# Supplementary material for: Body composition and physical activity as mediators in the relationship between socioeconomic status and blood pressure in young South African women: a structural equation model analysis
Source: PubMed Central journal article supplement (PMC6303607; doi:10.1136/bmjopen-2018-023404), 2018-12-19
Supplement: bmjopen-2018-023404.draft_revisions.pdf [file bmjopen-2018-023404.draft_revisions.pdf]

# BMJ Open

BMJ Open is committed to open peer review. As part of this commitment we make the peer review history of every article we publish publicly available.

When an article is published we post the peer reviewers' comments and the authors' responses online. We also post the versions of the paper that were used during peer review. These are the versions that the peer review comments apply to.

The versions of the paper that follow are the versions that were submitted during the peer review process. They are not the versions of record or the final published versions. They should not be cited or distributed as the published version of this manuscript.

BMJ Open is an open access journal and the full, final, typeset and author-corrected version of record of the manuscript is available on our site with no access controls, subscription charges or pay-per-view fees (<http://bmjopen.bmj.com>).

If you have any questions on BMJ Open's open peer review process please email [info.bmjopen@bmj.com](mailto:info.bmjopen@bmj.com)

# BMJ Open

## Body composition and physical activity as mediators in the relationship between socio-economic status and blood pressure in young South African women: A structural equation model analysis

|                               |                                                                                                                                                                                                                                                                                                                                                                                                                                                                                                                                                                                                                                                                                                                                                                                                                                                                                                                                      |
|-------------------------------|--------------------------------------------------------------------------------------------------------------------------------------------------------------------------------------------------------------------------------------------------------------------------------------------------------------------------------------------------------------------------------------------------------------------------------------------------------------------------------------------------------------------------------------------------------------------------------------------------------------------------------------------------------------------------------------------------------------------------------------------------------------------------------------------------------------------------------------------------------------------------------------------------------------------------------------|
| Journal:                      | <i>BMJ Open</i>                                                                                                                                                                                                                                                                                                                                                                                                                                                                                                                                                                                                                                                                                                                                                                                                                                                                                                                      |
| Manuscript ID                 | bmjopen-2018-023404                                                                                                                                                                                                                                                                                                                                                                                                                                                                                                                                                                                                                                                                                                                                                                                                                                                                                                                  |
| Article Type:                 | Research                                                                                                                                                                                                                                                                                                                                                                                                                                                                                                                                                                                                                                                                                                                                                                                                                                                                                                                             |
| Date Submitted by the Author: | 10-Apr-2018                                                                                                                                                                                                                                                                                                                                                                                                                                                                                                                                                                                                                                                                                                                                                                                                                                                                                                                          |
| Complete List of Authors:     | Munthali, Richard; University of the Witwatersrand, MRC/Wits Developmental Pathways for Health Research Unit<br>Manyema, Mercy; Wits University, Epidemiology and Biostatistics<br>Said-Mohamed, Rihlat; University of the Witwatersrand, MRC/Wits Developmental Pathways for Health<br>Kagura, Juliana; University of Witwatersrand, Paediatrics and Child health<br>Tollman, Stephen; University of the Witwatersrand,<br>Kahn, Kathleen; University of the Witwatersrand,<br>Gómez-Olivé, F. Xavier; University of the Witwatersrand, Medical Research Council/Wits Rural Health and Health Transitions Unit (Agincourt), School of Public Health, Faculty of Health Sciences<br>Micklesfield, Lisa; University of the Witwatersrand, MRC/Wits Developmental Pathways for Health Research Unit<br>Dunger, David; University of Cambridge, Paediatrics<br>Norris, Shane; University of Witwatersrand, Paediatrics and Child Health |
| Keywords:                     | Hypertension < CARDIOLOGY, Obesity, Socioeconomic status, Physical activity, Structural equation model, Body mass index                                                                                                                                                                                                                                                                                                                                                                                                                                                                                                                                                                                                                                                                                                                                                                                                              |
|                               |                                                                                                                                                                                                                                                                                                                                                                                                                                                                                                                                                                                                                                                                                                                                                                                                                                                                                                                                      |

SCHOLARONE™  
Manuscripts

1  
2  
3  
4 **Body composition and physical activity as mediators in the relationship between socio-economic status and**  
5 **blood pressure in young South African women: A structural equation model analysis**  
6  
7

8 Richard J Munthali<sup>1</sup>, Mercy Manyema<sup>1,2</sup>, Rihlat Said-Mohamed<sup>1</sup>, Juliana Kagura<sup>1</sup>, Stephen Tollman<sup>3,4,5</sup>, Kathleen  
9 Kahn<sup>3,4,5</sup>, F. Xavier Gómez-Olivé<sup>3</sup>, Lisa K. Micklesfield<sup>1</sup>, David Dunger<sup>6,1</sup>, Shane A. Norris<sup>1</sup>  
10  
11  
12

13 **Affiliations:**

14 <sup>1</sup>MRC/WITS Developmental Pathways for Health Research Unit, Department of Paediatrics, School of Clinical  
15 Medicine, Faculty of Health Sciences, University of the Witwatersrand, 7 York Rd, Parktown 2193, Johannesburg,  
16 South Africa  
17

18  
19 <sup>2</sup>DST-NRF Centre of Excellence in Human Development, University of the Witwatersrand, Johannesburg, South  
20 Africa  
21

22 <sup>3</sup>MRC/Wits Rural Public Health and Health Transitions Research Unit, School of Public Health, Faculty of Health  
23 Sciences, University of the Witwatersrand, Johannesburg, South Africa  
24

25 <sup>4</sup>INDEPTH Network, Accra, Ghana  
26

27 <sup>5</sup>Umeå Centre for Global Health Research, Sweden.  
28

29  
30 <sup>6</sup>Department of Paediatrics, MRC Wellcome Trust-MRC Institute of Metabolic Science, NIHR Cambridge  
31 Comprehensive Biomedical Research Centre, University of Cambridge, Box 116, Addenbrooke's Hospital, Hills  
32 Road, Cambridge CB2 0QQ, UK  
33  
34

35 **Conflict of interest:** The views expressed in the submitted article are our own and not an official position of the  
36 affiliated institutions or funder. Authors have no financial relationships relevant to this article to disclose.  
37  
38

39  
40 **Corresponding Author:** Dr. Richard J. Munthali

41  
42 MRC/Wits Developmental Pathways for Health Research Unit

43  
44 University of the Witwatersrand

45  
46 Johannesburg  
47

48  
49 Tel: +27119331122

50  
51 Email: munthali@aims.ac.za  
52  
53  
54  
55  
56  
57  
58  
59  
60

**Authors' emails:**

Richard Junganiko Munthali: munthali@aims.ac.za

Mercy Manyema: mercy.manyema@gmail.com

Rihlat Said-Mohamed: rihlat.saidmohamed@wits.ac.za

Juliana Kagura: julianakagura@gmail.com

Stephen Tollman: stephen.tollman@wits.ac.za

Kathleen Kahn: kathleen.kahn@wits.ac.za

F. Xavier Gómez-Olivé: F.Gomez-OliveCasas@wits.ac.za

Lisa K. Micklesfield: lisa.micklesfield@wits.ac.za

David Dunger: dbd25@cam.ac.uk

Shane A Norris: shane.norris@wits.ac.za

## Abstract

**Objectives** Varying hypertension prevalence across different socio-economic strata within a population has been well reported. However the causal factors and pathways across different settings are less clear, especially in sub-Saharan Africa. Therefore, this study aimed to compare blood pressure levels, and investigate the extent to which socioeconomic status (SES) is associated with blood pressure, in rural and urban South Africa women.

**Setting** Rural and urban South Africa.

**Design** Cross-section.

**Participants** Cross-sectional data on SES, total moderate-vigorous physical activity (PA), anthropometric and blood pressure data were collected on rural (n=509) and urban (n=510) young black women (18-23 years age). Pregnant and mentally or physically disabled women were excluded from the study.

**Results** The prevalence of combined overweight and obesity (46.5% versus 38.8%) and elevated blood pressure (27.0% versus 9.3%) were higher in urban than rural women respectively. Results from the structural equation modelling showed significant direct positive effects of BMI and SBP in rural, urban and combined datasets. Negative direct effects of SES on SBP and positive total effects of SES on SBP were observed in the rural and combined datasets respectively. In rural young women, SES had direct positive effects on BMI and was negatively associated with MVPA in urban and combined analyses. Body mass index mediated the positive total effects association between SES and SBP in combined analyses ( $\beta$ ; 95%CI, 0.46; 0.15 to 0.76).

**Conclusions** Though South Africa is undergoing nutritional and epidemiological transitions; the prevalence of elevated BP still varies between rural and urban young women. The association between socioeconomic status and SBP varies considerably in economically diverse populations with BMI being the most significant mediator. There is need to tailor prevention strategies to take account optimizing BMI when designing strategies to reduce future risk of hypertension in young women.

**Keywords** Blood pressure, Body mass index, Hypertension, Obesity, Urban, Rural, Socioeconomic status, Structural equation model, Physical activity

### Strengths

1. The use of structural modelling allowed us to explore direct and indirect (mediation) effects of social economic status, physical activities and body mass index on elevated blood pressure from representative sample of rural and urban population of South African young women.
2. Although the urban and rural cohorts were from two different studies, the same research unit conducted both studies and, therefore, the methodology was harmonized between the two sites, thereby allowing for accurate comparison.

### Limitations

1. Other unmeasured data, such as undernutrition in infancy, and dietary patterns were not included in the current analyses. We are currently working on research to address this limitation.
2. The low reliability of self-report data on physical activity could introduce bias. Thus, there is need for more precise, objective measures of physical activity to strengthen the results of our analysis.
3. There is need to do comparison on longitudinal data, especially as the socioeconomic environment is changing rapidly due to rural-urban labor migration and other factors would be helpful to examine these associations over time.

## Introduction

High blood pressure (hypertension) is a leading risk factor contributing to the global disease burden, accounting for 7% of global disability-adjusted life years (DALYs) and contributing to the 34.5 million non-communicable disease (NCD) related deaths in 2010 [1, 2]. A recent global meta-analysis, involving 19.1 million individuals, reported that on average there has been a decrease in blood pressure globally, but the low- to middle-income countries (LMICs) have seen an increase in hypertension [3]. The prevalence of high blood pressure in LMICs is estimated at 30% [4, 5] and it is the most significant risk factor for cardiovascular disease, most notably stroke [6]. In 2000, hypertension was estimated to have caused 9% of all deaths and over 390 000 DALYs in South Africa. Further, hypertension contributed to 50% of all strokes and 42% of ischaemic heart disease (IHD), signifying a substantial public health burden [7]. A systematic review of sub-Saharan African (SSA) data shows prevalence rates of hypertension of up to 41% with higher prevalence rates noted in urban compared to rural populations [8, 9]. A recent study in men and women aged 40 to 60 years of age in six sites across four SSA countries, including South Africa, showed the same trend with South African urban and rural cohorts having the highest prevalence (41.6 to 54.1%) [10].

Low and middle-income countries are experiencing both epidemiological and nutritional transitions with urban populations further along the transition as demonstrated by the higher prevalence of obesity and NCDs [4, 5, 8, 10-15]. Some evidence has shown that there are differences in the levels of blood pressure between rural and urban settings [8], while other studies have found no significant differences [16]. According to Glass and McAtee, internal biological systems are sculpted by an interaction between genes and prolonged exposure to particular external environments, a principle they call embodiment [17]. Thus the differences in built and social environments between rural and urban settings may explain the differences in disease prevalence. A Ghanaian study showed that both systolic and diastolic blood pressure were significantly lower in rural participants compared to urban participants [18]. However, a similar study in adolescents found that blood pressure levels were only lower in rural boys, with no difference in the girls [19]. Pediatric and adolescent hypertension have been reported to track into adulthood in a South African urban population [20]. Results on elevated blood pressure from studies in rural South African children have reported prevalence rates varying from 1.0% to 25.4% [21-24]. The factors explaining these differences have not been fully studied in LMICs.

Socioeconomic factors such as education, household income and household assets have been associated with blood pressure levels [25-27]. In a US cohort of young adults, a higher household income remained associated with lower systolic blood pressure (SBP) even after controlling for all potential covariates including age, sex and bio-behavioral factors [28]. Similarly, in a French sample of 30-79 year olds, SBP independently increased and was inversely associated with both individual education and residential neighborhood education [29]. Studies in African countries have also found varying associations between SES and blood pressure patterns, with both positive and negative associations reported [8, 30, 31]. Some studies have speculated that the association between SES and body mass index (BMI), physical activity levels, diet, smoking, alcohol intake and malnutrition may influence blood pressure

1  
2  
3 patterns [18, 28, 31, 32]. Physical activity has been inversely associated with blood pressure and BMI directly  
4 associated with BP in more advanced economies, but inconsistent associations have been reported in LMICs [25,  
5 33-37].  
6  
7

8  
9 There is a need to examine blood pressure and its determinants in young South African adults given the high rates of  
10 overweight and obesity and hypertension observed in this age group [20, 38]. Recent South African reports also  
11 indicate that the highest pregnancy rates occur in the age range of 20-24 years, with 26.2% of births reported,  
12 followed closely by the 25-29 year age group (25.7%) [39], and therefore targeting young adult women would also  
13 reduce adverse health outcomes in their children. To better target policies or programmes in future to address  
14 hypertension and obesity in the different settings, it is important to examine more closely rural-urban differences in  
15 hypertension due to differences in the epidemiology of obesity, SES divergence in the South African context [23,  
16 26, 30, 40-43]. Therefore, this study aims to compare blood pressure between rural and urban young adult South  
17 African women, and to determine whether there is an association between SES and blood pressure and whether it is  
18 mediated physical activity and BMI.  
19  
20  
21  
22  
23  
24

## 25 **Methods**

### 26 **Study sample and site**

27  
28 The rural Agincourt site, 2016 potential the female participants between the ages of 18 and 23 years were in the  
29 existing Agincourt Health and Socio-demographic Surveillance System database [44]. Only 996 were located during  
30 the data collection period and were invited to participate, of these 509 female participants were recruited after giving  
31 consent to participate. The urban sample consisted of 510 young women between the ages of 21 and 24 years who  
32 were randomly selected from the sample of 720 females who were part of the Birth-to-Twenty plus (BT20+) Young  
33 Adult Survey [45, 46]. Young women (n=51) who were pregnant at the time of the study were excluded.  
34 Measurements and questionnaires were completed by trained research assistants and nurses, and were standardised  
35 between both sites, to eliminate biases. The study protocols were approved by the Human Research Ethics  
36 Committee of the University of the Witwatersrand (Clearance certificates M120138 for the Ntshembo-Hope Cross  
37 Sectional Survey in Agincourt and M111182 for the BT20+ survey). A written consent to participate was provided  
38 by participants and mentally or physically disabled women were excluded from the study.  
39  
40  
41  
42  
43  
44  
45

### 46 **Blood pressure**

47  
48 Blood pressure (mm Hg) was the outcome variable and it was measured using an Omron 6 automated machine  
49 (Kyoto, Japan). A five minute seated rest was observed before taking the blood pressure measurements. Participants'  
50 seated blood pressure was measured three times on the right side, with a 2 min interval between each measurement.  
51 The mean for the second and third readings was recorded for the current analysis.  
52  
53

54  
55 According to the Seventh Report of the Joint National Committee on Prevention, Detection, Evaluation, and  
56 Treatment of High Blood Pressure [47], five categories of blood pressure have been established for adults 18 years  
57  
58  
59



of age and older as shown in Table 1. These cut-offs were utilized in the current study. Prehypertension and hypertension were combined to create a new variable called elevated BP.

**Table 1:** Blood pressure classification [47]

| <b>Classification</b>      | <b>Systolic<br/>Blood Pressure</b> | <b>or</b> | <b>Diastolic<br/>Blood Pressure</b> |
|----------------------------|------------------------------------|-----------|-------------------------------------|
| Low                        | <90                                | or        | < 60                                |
| Normal                     | <120                               | and       | <80                                 |
| Prehypertension            | 120-139                            | or        | 80-90                               |
| High: Stage 1 Hypertension | 140-159                            | or        | 90-99                               |
| High: Stage 2 hypertension | ≥160                               | or        | ≥100                                |

Systolic Blood Pressure was used in structural equation models (SEM) as it is more relevant in adults, and a good predictor of adverse health outcomes later in life [48], such as CVDs.

### **Anthropometry**

At both sites, participants' height and weight were measured by trained research assistants using standard techniques [49, 50]. Weight was measured in light clothing and barefoot to the nearest 0.1 kg using a digital scale (Tanita model TBF-410; Arlington Heights; USA). Height was measured barefoot to the nearest 0.1 cm using a stadiometer (Holtain, Crymych, UK). Waist circumference was measured with a non-stretchable fibreglass tape at the level of the umbilicus. Body mass index (BMI) was calculated as  $\text{weight/height}^2$  ( $\text{kg/m}^2$ ).

### **Socio-economic status (SES)**

Physical assets owned in the participants' household were used as a proxy for socio-economic status index [51]. It was generated by summing the number of assets owned in the household from the following: television, car, washing machine, fridge, phone, radio, microwave, cell phone, DVD/Video, DSTV (cable channel), computer, internet, medical aid. Previous studies in this population have shown that the sum of physical assets (household assets) is closely related to the household per capital expenditure and household income [51-53]. The household SES is regarded as a good measure of accumulated household wealth so it is a more reflective wealth index than income of a household's wealth over time.

### **Physical activity**

1  
2  
3 The Global Physical Activity Questionnaire (GPAQ), developed for global physical activity surveillance, was  
4 completed via interview to obtain self-reported physical activity [54]. Total moderate-vigorous intensity physical  
5 activity (MVPA) in minutes per week (mins/wk) was calculated by adding occupation, travel-related and leisure  
6 time moderate and vigorous intensity physical activity. Sitting time (mins/wk) was used as a proxy for sedentary  
7 time.  
8  
9

## 10 11 **Statistical analyses**

12  
13 Analysis of variance and student's t test, and Chi-squared tests and Wilcoxon rank sum test for non-parametric  
14 variables, were conducted to compare study characteristics between urban and rural young women. Structural  
15 equation modeling (SEM), with missing data option, was used to test and estimate the direct and indirect  
16 associations between variables, most especially the mediation roles of physical activity (MVPA) or sedentary time  
17 (sitting), and body composition (BMI and waist circumference), in the association between SES and blood pressure  
18 (systolic blood pressure).  
19  
20  
21

22  
23 Direct, indirect and total effects were computed and recorded, and the proportion of the total effect mediated was  
24 calculated. To evaluate the best fitting model for our data, we calculated different goodness of fit indices including  
25 Chi-squared test, Root mean squared error of approximation (RMSEA), Comparative fit index (CFI), Tucker-Lewis  
26 index (TLI) and Standardized root mean squared residual (SRMR) [55]. Though the Chi-squared test has been  
27 popularly used as a goodness of fit index, it has been reported to be biased and not reliable as the only goodness of  
28 fit index. It is also highly sensitive to sample size [56, 57], and often inflated with non-normal data such as physical  
29 activity data and we therefore employed the Hu and Bentler's Two-Index Presentation Strategy (1999) combination  
30 rule, with cut off values depending on the fitness index, to determine the best model fit [55, 58].  
31  
32  
33

34  
35 If the direct and indirect effects had opposite signs (negative or positive effects) the proportion mediated was  
36 assessed using the absolute values for all indirect and direct effects [59]. All the analyses were conducted using  
37 STATA (version 13.0; STATA Corp., College Station, TX, USA).  
38  
39

## 40 **Results**

### 41 42 **Study characteristics**

43  
44 Descriptive statistics for the non-pregnant study participants (urban, n=492; rural, n=476) are presented in Table 2.  
45 There was no difference in BMI or waist circumference between the urban and rural participants, but the prevalence  
46 of overweight and obesity was significantly higher in the urban (46.5%) compared to the rural young women  
47 (38.8%). Household SES was significantly higher in the urban compared to the rural group. Self reported physical  
48 activity (total MVPA) was significantly higher in the rural than urban women ( $p<0.001$ ), and the urban women spent  
49 significantly more time sitting than their rural counterparts ( $p<0.001$ ). Systolic and diastolic BP were significantly  
50 higher in the urban group, as was the prevalence of elevated BP (27.0 vs. 9.3%).  
51  
52  
53  
54  
55  
56  
57  
58  
59  
60

### Structural equation models for BMI and waist circumference

Results from the SEMs for SES associations with SBP via MVPA and BMI are presented in Tables 3a, 3b and 3c for urban, rural and combined analyses respectively, and also shown in Figures 1, 2, 3. No significant direct or indirect effects via (MVPA or BMI) of SES on SBP were observed in either the urban or rural women, but there were significant direct effects of SES on MVPA. Results showed that individuals with a higher SES index were less likely to be physically active in pooled data and urban women. In rural women, a one-unit increase in total household assets was associated with a decrease of 0.65 mmHg (-1.19 to -0.10) in SBP and an increase of 0.27 kg/m<sup>2</sup> in BMI (0.1 to 0.53) (Tables 3a, 3b and Figures 1, 2). The SEM for the combined sample showed a significant indirect effect of household SES on SBP via BMI, with 50% of the total effect being mediated by BMI (Table 3c and Figure 3). Direct positive effects of BMI on SBP were observed in both settings and the pooled sample with a 1 kg/m<sup>2</sup> increase in BMI being associated with an increase of 0.37 mmHg (0.21 to 0.53) and 0.33 (0.12 to 0.54) mmHg SBP in urban and rural young women, respectively. Similar results were observed when including waist circumference as the body composition indicator (data not shown).

### Discussion

A rising prevalence of hypertension has been reported in South Africa, with Peer et al. reporting a higher prevalence in 2008 (35.6%) compared to 1990 (21.6 %) in men and women aged 25-74 years in an urban black community in Cape Town, South Africa [40]. We have shown in young adult women from urban and rural South Africa, an overall elevated BP prevalence of 18.4 % (27.0 % in urban and 9.3 % in rural). We have also shown a direct effect of BMI on SBP in the urban and rural women separately, as well as when pooled, thereby providing further evidence of an association between overall adiposity and blood pressure. The total effects of SES on SBP were the same in both settings.

Prevalence data on elevated BP and hypertension from other countries in sub-Saharan Africa have shown conflicting results when comparing urban and rural communities. In Malawi, a higher prevalence of hypertension in urban compared to rural communities has been reported and attributed to differences in lifestyle as rural communities participate in subsistence based agricultural activities while the urban community has a more westernized lifestyle with higher salt intake and physical inactivity [9]. Similarly, data from Ghana have shown a higher mean SBP and DBP and a higher prevalence of hypertension in urban communities [18, 60]. In the PURE study in South Africa, Pisa and colleagues reported that both urban adult men and women had higher mean blood pressures in comparison to their rural peers though the overall CVD risk factors were equally prevalent in both settings [41]. In contrast, findings from Cameroon have reported a higher BP prevalence in rural compared to urban men and women older than 40 years old, while Kenyan studies have reported no significant differences [16, 61]. Results from six urban and rural sites in four sub-Saharan African countries – Kenya, South Africa, Ghana and Burkina Faso – have reported a prevalence of hypertension in women aged between 40 and 60 years ranging from 15.1% in rural Burkina Faso to 54.1% in urban South Africa [10]. It was also reported that in all three South African sites, both rural and urban, the

1  
2  
3 prevalence of hypertension was higher than in the other three countries [10]. These findings show the complex  
4 health transitions occurring in SSA and the impact that this is having on cardio-metabolic disease risk.  
5

6  
7 Our study showed significant differences in SES between the urban and rural samples, as well a big variation in SES  
8 between these two settings. The social patterning of CVD risk factors, including hypertension, in SSA and LMICs  
9 has in part been attributed to differences in countries' socioeconomic development. Previous results from five  
10 countries, (two high income and three LMICs), reported that hypertension and other CVD risk factors were  
11 substantially associated with education and wealth status; individuals with less education and lower wealth generally  
12 showing higher prevalence of CVD risk factors [62]. The effect of SES in this study is most evident in the rural  
13 women for whom household SES was lower (compared to urban) and who may be transitioning faster (both  
14 nutritionally and economically) than the urban women. Though SES is positively associated with BMI in rural  
15 young women, it is negatively associated with SBP. There may be other factors, such as physical activity due to  
16 agricultural activities or dietary patterns, which were not recorded. In addition, the weight gain observed might not  
17 be due to fat mass but rather to muscle mass and bone mass, which has been reported to be associated with SBP  
18 before [63].  
19  
20  
21  
22  
23  
24

25 In Mexico, women in rural and upper SES categories were likely to have a higher SBP, while we have reported that  
26 a higher SES was associated with a decrease in SBP in rural communities. At population level, there is a need to  
27 consider different SES categories and monitor the effect of transitioning from one category to another on  
28 hypertension, since these categories may respond differently to an increase or a decrease in their SES. Kagura and  
29 colleagues tracked SES in South African children and reported that moving from the low SES in infancy to a higher  
30 SES in adolescence had a protective effect on SBP level in young adulthood [26]. Our results have shown that this  
31 could be more pronounced in rural areas.  
32  
33  
34  
35

36 We observed a positive association between SES and BMI in the rural sample and the same direction of effects was  
37 observed in the urban (though not significant), which is in line with results reported in many LMICs including South  
38 Africa, but in contrast with those reported in higher income populations [33, 34, 62]. A systematic review of studies  
39 between 1989 to 2007 reported that SES was positively associated with obesity in the middle transitioning  
40 economies such as South Africa and Jamaica [64]. We have shown that both in the rural and urban participants (not  
41 significant), a higher SES resulted in reduced SBP, while the pooled (combined) analysis showed a positive total  
42 effect association between SES and SBP. This could be due to the introduction of more variation in SES when data  
43 from both sites are combined; with many individuals with low SES in the rural area, the associations became skewed  
44 towards the low SES individuals. This may suggest that different transitional levels of SES have different effects on  
45 hypertension risk depending on the environment (either urban or rural). Though not significant, the total effects of  
46 SES on SBP are the same in both rural and urban hence the differences in prevalence cannot be explained by the  
47 setting or SES alone. In urban and rural settings of four countries (Kenya, Namibia, Nigeria and Tanzania), the  
48 prevalence of age standardized hypertension was similarly high and ranging from 19.3 % to 38.0 % [11]. Cois and  
49 colleagues reported that a higher SES was associated with lower SBP in a nationally representative sample of South  
50 African women [25] using SEM models. Physical exercise, alcohol use, smoking and resting heart rate and BMI  
51  
52  
53  
54  
55  
56  
57  
58  
59  
60

1  
2  
3 were reported to be the mediators of the indirect of the association between SES and SBP in men but not in women,  
4 suggesting that other factors may play a major role in women [25]. Similarly, our results show that neither PA nor  
5 BMI mediate the association between SES and SBP in urban and rural settings, suggesting that other factors may  
6 explain the association. Among those, dietary patterns and stress have been reported to be independently associated  
7 with SBP [65, 66].  
8  
9

10  
11 The significant direct associations between BMI and SBP or hypertension are in line with other findings in South  
12 Africa and within the SSA region [11, 33, 40, 42, 67, 68]. This link was consistent in rural, urban and combined data  
13 sets, indicating the importance of BMI in the aetiology of blood pressure. Munthali et al reported that the link  
14 between obesity and hypertension could be observed as early as five years of age. Children with early onset of  
15 obesity were at higher risk of developing hypertension in late adolescence [38].  
16  
17  
18

19 In this study, using SEM models to explore the mediation role of BMI and PA helped quantify potential  
20 contributions of these variables to the effect of SES on SBP. The results show that PA was not a significant mediator  
21 in the association between SES and BP in the urban or the rural samples. SES was negatively associated with  
22 MVPA in urban and pooled samples, indicating that as individuals transition from low to higher SES, they reduce  
23 their physical activity level. We speculate that these differences in the association between SES and SBP in both our  
24 rural and urban results and in those from high-income countries are due to differences in levels of nutritional and  
25 epidemiological transition in these regions [69, 70]. Those with low SES in high-income countries are likely to  
26 consume cheaper, more energy dense foods, participate in less leisure time physical activity and be more sedentary  
27 [71, 72] In LMICs, agricultural activities remain a part of everyday life and a day-to-day activity in rural living,  
28 while those with higher SES in the same settings rapidly adopt the westernized life style with less PA, fewer  
29 agricultural activities and home grown food. However, this speculation is not supported by the data on PA in this  
30 study despite the rural participants having a higher PA. Our understanding of the Agincourt rural economy is that  
31 agriculture is quite a minor aspect though very useful to augment the household income.  
32  
33  
34  
35  
36  
37  
38

39 The limitations of this study are that other unmeasured data, such as undernutrition in infancy, which is a known risk  
40 factor for high blood pressure later in life [73], and dietary patterns were not included in the current analyses. We  
41 are currently working on research to address this limitation. We can also not rule out the role of genetics. Secondly,  
42 the low reliability of self-report data on physical activity could introduce bias. Thus, there is need for more precise,  
43 objective measures of physical activity to strengthen the results of our analysis. Lastly, longitudinal data, especially  
44 as the socioeconomic environment is changing rapidly due to rural-urban labor migration and other factors would be  
45 helpful to examine these associations over time.  
46  
47  
48

## 49 **Conclusions**

50  
51 Though the prevalence of overweight or obesity is relatively higher in both rural and urban than those reported in  
52 other SSA countries, women in the urban setting were at more risk for elevated blood pressure than their rural  
53 counterparts. The link between socioeconomic status and SBP varies in a more economically diverse population, as  
54  
55  
56  
57  
58  
59  
60

1  
2  
3 seen with the combined rural and urban dataset, with BMI being the most likely mediator. There is need to consider  
4 optimizing BMI as a key intervention strategy in young adults in part to combat hypertension.  
5

### 6 7 **Funding**

8  
9 Norris is supported by the UK MRC DfID African Research Leader Scheme and by the DST-NRF Centre of  
10 Excellence in Human Development at the University of the Witwatersrand, Johannesburg. Birth to Twenty data  
11 collection was supported by the Wellcome Trust under Grant [092097/Z/10/Z]. The MRC/Wits- Agincourt Unit is  
12 supported by the South African Medical Research Council, and the Wellcome Trust under Grants [058893/Z/99/A,  
13 069683/Z/02/Z, 085477/Z/08/Z, 085477/B/08/Z]. Opinions expressed and conclusions arrived at, are those of the  
14 authors and are not to be attributed to the CoE in Human Development.  
15  
16

### 17 18 **Conflict of interest**

19 Authors have no conflicts of interest to disclose.

### 20 21 **Consent for publication**

22 Not applicable

### 23 24 **Availability of data and material**

25 The datasets used and/or analysed during the current study are available from the Developmental Pathways  
26 for Health Research Unit data management department by contacting Prof. Shane A Norris on reasonable request  
27

### 28 29 **Competing interest**

30 The authors declare that they have no competing interests

### 31 32 **Authors' contributions**

33 RJM and SAN conceptualized the manuscript. RJM analyzed the data. RJM MM RSM JK ST KK FXG LKM DD  
34 SAN interpreted the data. RJM wrote the manuscript and all authors were involved in editing and approving the final  
35 manuscript.  
36

### 37 38 **Acknowledgements**

39 We wish to thank the Bt20+ and Agincourt participants for taking part in the study and the Bt20+ and Agincourt  
40 team for their relentless support throughout the study.  
41

### 42 43 **Ethics Approval and Consent to Participate**

44 Prior to the study, the study protocols were approved by the Human Research Ethics Committee of the  
45 University of the Witwatersrand (Clearance certificates M120138 for the Ntshembo-Hope Cross Sectional  
46 Survey in Agincourt and M111182 for the BT20+ survey). Independent written informed consent to  
47 participate was obtained from participants.  
48  
49  
50  
51  
52  
53  
54  
55  
56  
57  
58  
59  
60



## References

1. Lim SS, Vos T, Flaxman AD, Danaei G, Shibuya K, Adair-Rohani H, AlMazroa MA, Amann M, Anderson HR, Andrews KG *et al*: **A comparative risk assessment of burden of disease and injury attributable to 67 risk factors and risk factor clusters in 21 regions, 1990–2010: a systematic analysis for the Global Burden of Disease Study 2010.** *The Lancet* 2012, **380**(9859):2224-2260.
2. Lozano R, Naghavi M, Foreman K, Lim S, Shibuya K, Aboyans V, Abraham J, Adair T, Aggarwal R, Ahn SY: **Global and regional mortality from 235 causes of death for 20 age groups in 1990 and 2010: a systematic analysis for the Global Burden of Disease Study 2010.** *The Lancet* 2013, **380**(9859):2095-2128.
3. Ezzati M, Geleijnse J: **Worldwide trends in blood pressure from 1975 to 2015.** *The Lancet* 2017, **389**(10064):37-55.
4. Sarki AM, Nduka CU, Stranges S, Kandala N-B, Uthman OA: **Prevalence of Hypertension in Low- and Middle-Income Countries: A Systematic Review and Meta-Analysis.** *Medicine* 2015, **94**(50):e1959.
5. Chow CK, Teo KK, Rangarajan S, Islam S, Gupta R, Avezum A, Bahonar A, Chifamba J, Dagenais G, Diaz R: **Prevalence, awareness, treatment, and control of hypertension in rural and urban communities in high-, middle-, and low-income countries.** *Jama* 2013, **310**(9):959-968.
6. Kearney PM, Whelton M, Reynolds K, Muntner P, Whelton PK, He J: **Global burden of hypertension: analysis of worldwide data.** *The lancet* 2005, **365**(9455):217-223.
7. Norman R, Gaziano T, Laubscher R, Steyn K, Bradshaw D, Collaboration SACRA: **Estimating the burden of disease attributable to high blood pressure in South Africa in 2000.** *South African Medical Journal* 2007, **97**(8):692-698.
8. Addo J, Smeeth L, Leon DA: **Hypertension in Sub-Saharan Africa a systematic review.** *Hypertension* 2007, **50**(6):1012-1018.
9. Simmons D, Barbour G, Congleton J, Levy J, Meacher P, Saul H, Sowerby T: **Blood pressure and salt intake in Malawi: an urban rural study.** *Journal of epidemiology and community health* 1986, **40**(2):188-192.
10. Gómez-Olivé FX, Ali SA, Made F, Kyobutungi C, Nonterah E, Micklesfield L, Alberts M, Boua R, Hazelhurst S, Debpuur C: **Stark Regional and Sex Differences in the Prevalence and Awareness of Hypertension: An H3Africa AWI-Gen Study Across 6 Sites in Sub-Saharan Africa.** *Global Heart* 2017.
11. Hendriks ME, Wit FW, Roos MT, Brewster LM, Akande TM, de Beer IH, Mfinanga SG, Kahwa AM, Gatongi P, Van Rooy G: **Hypertension in sub-Saharan Africa: cross-sectional surveys in four rural and urban communities.** *PloS one* 2012, **7**(3):e32638.
12. Lemogoum D, Seedat YK, Mabadeje AF, Mendis S, Bovet P, Onwubere B: **International Forum for Hypertension control and prevention in Africa. Recommendations for prevention, diagnosis and**

- 1  
2  
3 **management of hypertension and cardiovascular risk factors in sub-Saharan Africa. *J Hypertens*  
4 2003, **21**.  
5**
- 6 13. Schutte A, Botha S, Fourie C, Gafane-Matemane L, Kruger R, Lammertyn L, Malan L, Mels C, Schutte R,  
7 Smith W: **Recent advances in understanding hypertension development in sub-Saharan Africa.**  
8 *Journal of Human Hypertension* 2017.  
9
- 10 14. Thorogood M, Connor MD, Lewando Hundt G, Tollman SM: **Understanding and managing**  
11 **hypertension in an African sub-district: A multidisciplinary approach**<sup>1</sup>. *Scandinavian Journal of*  
12 *Public Health* 2007, **35**(69 suppl):52-59.  
13
- 14 15. Yusufali A, Khatib R, Islam S, AlHabib K, Kelishadi R, Rangarajan S, Yusuf S: **LBOS 03-01**  
15 **PREVALENCE, AWARENESS, TREATMENT, AND CONTROL OF HYPERTENSION IN THE**  
16 **MIDDLE EAST: RESULTS FROM THE PROSPECTIVE URBAN RURAL EPIDEMIOLOGY**  
17 **(PURE) STUDY. *J Hypertens* 2016, **34** Suppl 1:e551.  
18**
- 19 16. Poulter N, Khaw K, Hopwood B, Mugambi M, Peart W, Rose G, Sever P: **Blood pressure and its**  
20 **correlates in an African tribe in urban and rural environments. *Journal of epidemiology and*  
21 *community health* 1984, **38**(3):181-185.  
22**
- 23 17. Glass TA, McAtee MJ: **Behavioral science at the crossroads in public health: extending horizons,**  
24 **envisioning the future. *Social science & medicine* 2006, **62**(7):1650-1671.  
25**
- 26 18. Agyemang C: **Rural and urban differences in blood pressure and hypertension in Ghana, West**  
27 **Africa. *Public Health* 2006, **120**.  
28**
- 29 19. Agyemang C, Redekop WK, Owusu-Dabo E, Bruijnzeels MA: **Blood pressure patterns in rural, semi-**  
30 **urban and urban children in the Ashanti region on Ghana, West Africa. *BMC Public Health* 2005, **5**.  
31**
- 32 20. Kagura J, Adair LS, Musa MG, Pettifor JM, Norris SA: **Blood pressure tracking in urban black South**  
33 **African children: birth to twenty cohort. *BMC pediatrics* 2015, **15**(1):1.  
34**
- 35 21. Goon D, Amusa L, Mhlongo D, Khoza L, Any-Anwu F: **Elevated blood pressure among Rural South**  
36 **African Children in Thohoyandou, South Africa. *Iran J Pub Health* 2013, **42**.  
37**
- 38 22. Kemp C, Pienaar AE, Schutte AE: **The prevalence of hypertension and the relationship with body**  
39 **composition in Grade 1 learners in the North West Province of South Africa. *South African Journal of*  
40 *Sports Medicine* 2011, **23**(4).  
41**
- 42 23. Monyeki K, Kemper H, Makgae P: **The association of fat patterning with blood pressure in rural South**  
43 **African children: the Ellisras Longitudinal Growth and Health Study. *International journal of*  
44 *epidemiology* 2006, **35**(1):114-120.  
45**
- 46 24. Schutte A, Van Rooyen J, Huisman H, Kruger H, Malan N, De Ridder J: **Dietary risk markers that**  
47 **contribute to the aetiology of hypertension in black South African children: the THUSA BANA**  
48 **study. *Journal of human hypertension* 2003, **17**(1):29-35.  
49**
- 50 25. Cois A, Ehrlich R: **Analysing the socioeconomic determinants of hypertension in South Africa: a**  
51 **structural equation modelling approach. *BMC public health* 2014, **14**(1):414.  
52  
53  
54  
55  
56  
57  
58  
59  
60**



- 1  
2  
3 26. Kagura J, Adair LS, Pisa PT, Griffiths PL, Pettifor JM, Norris SA: **Association of socioeconomic status**  
4 **change between infancy and adolescence, and blood pressure, in South African young adults: Birth**  
5 **to Twenty Cohort.** *BMJ open* 2016, **6**(3):e008805.
- 7 27. Wilson DK, Kliewer W, Plybon L, Sica DA: **Socioeconomic status and blood pressure reactivity in**  
8 **healthy black adolescents.** *Hypertension* 2000, **35**(1):496-500.
- 10 28. Brummett BH, Babyak MA, Siegler IC, Shanahan M, Harris KM, Elder GH, Williams RB: **Systolic Blood**  
11 **Pressure, Socioeconomic Status, and Biobehavioral Risk Factors in a Nationally Representative US**  
12 **Young Adult Sample.** *Hypertension* 2011, **58**(2):161-166.
- 14 29. Chaix B, Bean K, Leal C, Thomas F, Havard S, Evans D, Jégo B, Pannier B: **Individual/Neighborhood**  
15 **Social Factors and Blood Pressure in the RECORD Cohort Study.** *Which Risk Factors Explain the*  
16 *Associations?* 2010, **55**(3):769-775.
- 19 30. Griffiths PL, Sheppard ZA, Johnson W, Cameron N, Pettifor JM, Norris SA: **Associations between**  
20 **household and neighbourhood socioeconomic status and systolic blood pressure among urban South**  
21 **African adolescents.** *Journal of biosocial science* 2012, **44**(04):433-458.
- 23 31. Longo-Mbenza B, Luila EL, M'Buyamba-Kabangu J: **Nutritional status, socio-economic status, heart**  
24 **rate, and blood pressure in African school children and adolescents.** *International journal of*  
25 *cardiology* 2007, **121**(2):171-177.
- 27 32. Aounallah-Skhiri H, El Ati J, Traissac P, Romdhane HB, Eymard-Duvernay S, Delpeuch F, Achour N,  
28 Maire B: **Blood pressure and associated factors in a North African adolescent population. A national**  
29 **cross-sectional study in Tunisia.** *BMC Public Health* 2012, **12**(1):1.
- 31 33. Afrifa-Anane E, Agyemang C, Codjoe SNA, Ogedegbe G, Aikins Ad-G: **The association of physical**  
32 **activity, body mass index and the blood pressure levels among urban poor youth in Accra, Ghana.**  
33 *BMC public health* 2015, **15**(1):269.
- 35 34. Anane AE, Agyemang C, Codjoe SNA, Ogedegbe G, Aikins A: **The association of physical activity,**  
36 **Body mass index and blood pressure among urban poor youth in Accra, Ghana.** *BMC Public Health*  
37 2015, **15**.
- 39 35. Hu G, Barengo NC, Tuomilehto J, Lakka TA, Nissinen A, Jousilahti P: **Relationship of physical activity**  
40 **and body mass index to the risk of hypertension: a prospective study in Finland.** *Hypertension* 2004,  
41 **43**(1):25-30.
- 43 36. Juraschek SP, Blaha MJ, Whelton SP, Blumenthal R, Jones SR, Keteyian SJ, Schairer J, Brawner CA, Al-  
44 Mallah MH: **Physical fitness and hypertension in a population at risk for cardiovascular disease: the**  
45 **Henry Ford Exercise Testing (FIT) Project.** *Journal of the American Heart Association* 2014,  
46 **3**(6):e001268.
- 48 37. Väistö J, Eloranta A-M, Viitasalo A, Tompuri T, Lintu N, Karjalainen P, Lampinen E-K, Ågren J,  
49 Laaksonen DE, Lakka H-M: **Physical activity and sedentary behaviour in relation to cardiometabolic**  
50 **risk in children: cross-sectional findings from the Physical Activity and Nutrition in Children**  
51 **(PANIC) Study.** *International Journal of Behavioral Nutrition and Physical Activity* 2014, **11**(1):55.
- 52  
53  
54  
55  
56  
57  
58  
59  
60

- 1  
2  
3 38. Munthali RJ, Kagura J, Lombard Z, Norris SA: **Childhood adiposity trajectories are associated with late**  
4 **adolescent blood pressure: birth to twenty cohort.** *BMC Public Health* 2016, **16**(1):1-10.
- 5  
6 39. STATSSA: **Mortality and causes of death in South Africa, 2015: Findings from death notification.** In.  
7 Pretoria: Statistics South Africa; 2017 1–140. .
- 8  
9 40. Peer N, Steyn K, Lombard C, Gwebushe N, Levitt N: **A high burden of hypertension in the urban black**  
10 **population of Cape Town: The Cardiovascular Risk in Black South Africans (CRIBSA) Study.** *PLoS*  
11 *One* 2013, **8**(11):e78567.
- 12  
13 41. Pisa P, Behanan R, Vorster H, Kruger A: **Social drift of cardiovascular disease risk factors in Africans**  
14 **from the North West Province of South Africa: the PURE study: cardiovascular topics.**  
15 *Cardiovascular journal of Africa* 2012, **23**(7):371-388.
- 16  
17 42. Steyn K, Fourie J, Lombard C, Katzenellenbogen J, Bourne L, Jooste P: **Hypertension in the black**  
18 **community of the Cape Peninsula, South Africa.** *East African medical journal* 1996, **73**(11):758-763.
- 19  
20 43. Tibazarwa K, Ntyintyane L, Sliwa K, Gertholtz T, Carrington M, Wilkinson D, Stewart S: **A time bomb**  
21 **of cardiovascular risk factors in South Africa: results from the Heart of Soweto Study “Heart**  
22 **Awareness Days”.** *International journal of cardiology* 2009, **132**(2):233-239.
- 23  
24 44. Kahn K, Collinson MA, Gómez-Olivé FX, Mokoena O, Twine R, Mee P, Afolabi SA, Clark BD, Kabudula  
25 CW, Khosa A: **Profile: Agincourt health and socio-demographic surveillance system.** *International*  
26 *journal of epidemiology* 2012, **41**(4):988-1001.
- 27  
28  
29 45. Pradeilles R, Rousham EK, Norris SA, Griffiths PL: **Urban South African adolescents' perceptions of**  
30 **their neighborhood socio-economic environments: the Birth to Twenty plus cohort study.** *Children*  
31 *Youth and Environments* 2014, **24**(3):173-200.
- 32  
33 46. Richter L, Norris S, Pettifor J, Yach D, Cameron N: **Cohort profile: Mandela's children: the 1990 Birth**  
34 **to Twenty study in South Africa.** *International journal of epidemiology* 2007, **36**(3):504-511.
- 35  
36 47. Chobanian AV: **Joint National Committee on Prevention, Detection, Evaluation, and Treatment of**  
37 **High Blood Pressure. National Heart, Lung, and Blood Institute; National High Blood Pressure**  
38 **Education Program Coordinating Committee: Seventh report of the Joint National Committee on**  
39 **Prevention, Detection, Evaluation, and Treatment of High Blood Pressure.** *Hypertension* 2003,  
40 **42**:1206-1252.
- 41  
42  
43 48. Strandberg TE, Pitkala K: **What is the most important component of blood pressure: systolic, diastolic**  
44 **or pulse pressure?** *Current opinion in nephrology and hypertension* 2003, **12**(3):293-297.
- 45  
46 49. Cameron N: **The measurement of human growth:** Taylor & Francis; 1984.
- 47  
48 50. Lohman TG, Roche AF, Martorell R: **Anthropometric standardization reference manual:** Human  
49 kinetics books; 1988.
- 50  
51 51. Houweling TA, Kunst AE, Mackenbach JP: **Measuring health inequality among children in developing**  
52 **countries: does the choice of the indicator of economic status matter?** *International journal for equity*  
53 *in health* 2003, **2**(1):8.
- 54  
55  
56  
57  
58  
59  
60

- 1  
2  
3 52. Feeley AB, Musenge E, Pettifor JM, Norris SA: **Investigation into longitudinal dietary behaviours and household socio-economic indicators and their association with BMI Z-score and fat mass in South African adolescents: the Birth to Twenty (Bt20) cohort.** *Public health nutrition* 2013, **16**(04):693-703.
- 4  
5  
6  
7 53. Jones LL, Griffiths PL, Adair LS, Norris SA, Richter LM, Cameron N: **A comparison of the socio-economic determinants of growth retardation in South African and Filipino infants.** *Public health nutrition* 2008, **11**(12):1220-1228.
- 8  
9  
10  
11 54. Bull FC, Maslin TS, Armstrong T: **Global physical activity questionnaire (GPAQ): nine country reliability and validity study.** *Journal of Physical Activity and health* 2009, **6**(6):790-804.
- 12  
13  
14  
15 55. Hu Lt, Bentler PM: **Cutoff criteria for fit indexes in covariance structure analysis: Conventional criteria versus new alternatives.** *Structural equation modeling: a multidisciplinary journal* 1999, **6**(1):1-55.
- 16  
17  
18  
19 56. Schermelleh-Engel K, Moosbrugger H, Müller H: **Evaluating the fit of structural equation models: Tests of significance and descriptive goodness-of-fit measures.** *Methods of psychological research online* 2003, **8**(2):23-74.
- 20  
21  
22  
23 57. Vandenberg RJ: **Introduction: Statistical and Methodological Myths and Urban Legends: Where, Pray Tell, Did They Get This Idea?** In.: Sage Publications Sage CA: Thousand Oaks, CA; 2006.
- 24  
25  
26 58. Fan X, Sivo SA: **Sensitivity of fit indexes to misspecified structural or measurement model components: Rationale of two-index strategy revisited.** *Structural Equation Modeling* 2005, **12**(3):343-367.
- 27  
28  
29  
30 59. Alwin DF, Hauser RM: **The decomposition of effects in path analysis.** *American sociological review* 1975:37-47.
- 31  
32  
33 60. Kerry SM, Emmett L, Micah FB, Martin-Peprah R, Antwi S, Phillips RO, Plange-Rhule J, Eastwood JB, Cappuccio FP: **Rural and semi-urban differences in salt intake, and its dietary sources, in Ashanti, West Africa.** *Ethnicity & disease* 2005, **15**(1):33-39.
- 34  
35  
36  
37 61. Lissack CNA, Sobngwi E, Ngassam E, Ngoa LSE: **Rural and urban differences in metabolic profiles in a Cameroonian population.** *Pan African Medical Journal* 2011, **10**.
- 38  
39  
40 62. Stringhini S, Forrester TE, Plange-Rhule J, Lambert EV, Viswanathan B, Riesen W, Korte W, Levitt N, Tong L, Dugas LR: **The social patterning of risk factors for noncommunicable diseases in five countries: evidence from the modeling the epidemiologic transition study (METS).** *BMC Public Health* 2016, **16**(1):956.
- 41  
42  
43  
44 63. de Hoog ML, van Eijnsden M, Stronks K, Gemke RJ, Vrijkotte TG: **Association between body size and blood pressure in children from different ethnic origins.** *Cardiovascular diabetology* 2012, **11**(1):136.
- 45  
46  
47  
48 64. Dinsa G, Goryakin Y, Fumagalli E, Suhreke M: **Obesity and socioeconomic status in developing countries: a systematic review.** *Obesity reviews* 2012, **13**(11):1067-1079.
- 49  
50  
51  
52 65. Masala G, Bendinelli B, Versari D, Saieva C, Ceroti M, Santagiuliana F, Caini S, Salvini S, Sera F, Taddei S: **Anthropometric and dietary determinants of blood pressure in over 7000 Mediterranean women:**
- 53  
54  
55  
56  
57  
58  
59  
60

- 1  
2  
3 **the European Prospective Investigation into Cancer and Nutrition-Florence cohort.** *Journal of*  
4 *hypertension* 2008, **26**(11):2112-2120.
- 5  
6 66. Wilson BL, Albright GL, Steiner SS, Andreassi JL: **Cardiodynamic response to psychological and cold**  
7 **pressor stress: further evidence for stimulus response specificity and directional fractionation.**  
8 *Biofeedback and Self-regulation* 1991, **16**(1):45-53.
- 9  
10 67. Goon D, Amusa L, Mhlongo D, Khoza L, Any-Anwu F: **Elevated blood pressure among rural South**  
11 **African children in Thohoyandou, South Africa.** *Iranian journal of public health* 2013, **42**(5):489.
- 12  
13 68. Moselakgomo VK, Toriola AL, Shaw BS, Goon DT, Akinyemi O: **Body mass index, overweight, and**  
14 **blood pressure among adolescent schoolchildren in Limpopo province, South Africa.** *Revista Paulista*  
15 *de Pediatria* 2012, **30**(4):562-569.
- 16  
17 69. Lynch JW, Smith GD, Kaplan GA, House JS: **Income inequality and mortality: importance to health of**  
18 **individual income, psychosocial environment, or material conditions.** *BMJ: British Medical Journal*  
19 2000, **320**(7243):1200.
- 20  
21 70. Ploubidis GB, Mathenge W, De Stavola B, Grundy E, Foster A, Kuper H: **Socioeconomic position and**  
22 **later life prevalence of hypertension, diabetes and visual impairment in Nakuru, Kenya.** *International*  
23 *journal of public health* 2013, **58**(1):133-141.
- 24  
25 71. Drewnowski A: **The cost of US foods as related to their nutritive value.** *The American journal of*  
26 *clinical nutrition* 2010, **92**(5):1181-1188.
- 27  
28 72. Popkin BM: **The nutrition transition and obesity in the developing world.** *The Journal of nutrition*  
29 2001, **131**(3):871S-873S.
- 30  
31 73. Sawaya AL, Sesso R, Florencio TM, Fernandes MT, Martins PA: **Association between chronic**  
32 **undernutrition and hypertension.** *Maternal & child nutrition* 2005, **1**(3):155-163.
- 33  
34  
35  
36  
37  
38  
39  
40  
41  
42  
43  
44  
45  
46  
47  
48  
49  
50  
51  
52  
53  
54  
55  
56  
57  
58  
59  
60

Table 2: Descriptive characteristics

|                                              | Total          | n   | Urban         | n   | Rural          | p value |
|----------------------------------------------|----------------|-----|---------------|-----|----------------|---------|
| Age (years)                                  | 22.04 (1.24)   | 492 | 22.77 (0.49)  | 476 | 21.28 (1.31)   | 0.001   |
| Weight (kg)                                  | 64.62 (14.82)  | 492 | 64.67 (15.6)  | 473 | 64.55 (14.03)  | 0.90    |
| Height (m)                                   | 1.61 (0.007)   | 492 | 1.60 (0.07)   | 475 | 1.61 (0.07)    | 0.001   |
| BMI (kg/m <sup>2</sup> )                     | 25.05 (5.59)   | 492 | 25.32 (5.91)  | 473 | 24.78 (5.24)   | 0.13    |
| BMI classification (%)                       |                |     |               |     |                | 0.015   |
| Underweight (<18.4 kg/m <sup>2</sup> )       | 5.98           |     | 7.10          |     | 4.82           |         |
| Normal weight (18.5-24.9 kg/m <sup>2</sup> ) | 51.34          |     | 46.45         |     | 56.39          |         |
| Overweight (25-29.9 kg/m <sup>2</sup> )      | 26.19          |     | 29.21         |     | 23.06          |         |
| Obese (≥30 kg/m <sup>2</sup> )               | 16.49          |     | 17.24         |     | 15.72          |         |
| Waist circumference (cm)                     | 80.60 (12.08)  | 493 | 80.18 (12.63) | 477 | 81.03 (11.47)  | 0.26    |
| Household SES index (sum of assets)          | 7.24 (2.70)    | 493 | 8.83 (2.37)   | 476 | 5.59 (1.91)    | 0.0000  |
| Total MVPA (min/week)*                       | 870(280-1810)  | 492 | 420(160-900)  | 385 | 1680(970-2580) | <0.001  |
| Sitting time (mins/day)*                     | 300 (240-480)  | 492 | 360 (240-480) | 385 | 300 (180-360)  | <0.001  |
| Systolic blood pressure                      | 106.68 (11.64) | 492 | 110.30 (11.4) | 471 | 102.89 (10.7)  | 0.000   |
| Diastolic blood pressure                     | 70.23 (9.00)   | 492 | 72.78 (8.3)   | 471 | 67.57 (9.0)    | 0.000   |
| BP classification (%)                        |                |     |               |     |                | 0.000   |
| Low BP                                       | 12.46          |     | 5.49          |     | 19.75          |         |
| Normal BP                                    | 69.16          |     | 67.48         |     | 70.91          |         |
| Prehypertension                              | 16.20          |     | 23.58         |     | 8.49           |         |
| Hypertensive                                 | 2.18           |     | 3.46          |     | 0.85           |         |
| Elevated BP (%)                              | 18.38          |     | 27.04         |     | 9.34           | 0.000   |

Data presented as mean (SD) otherwise stated

\* Median(IQR)

**Table 3a:** Structural equation model for SES, MVPA and BMI on SBP in urban women

| Effect of:<br>N=489     | Outcome: | Direct effects(95% CI)   | Indirect effects( 95% CI) | Total effects(95% CI)     | Proportion of total effect mediated |
|-------------------------|----------|--------------------------|---------------------------|---------------------------|-------------------------------------|
| <b>Household assets</b> | SBP      | -0.34 (-0.75; 0.07)      |                           | -0.29 (-0.70; 0.12)       | 0.13 <sup>a</sup>                   |
|                         | via BMI  |                          | 0.05 (-0.05; 0.14)        |                           |                                     |
|                         | BMI      | 0.13 (-0.09; 0.35)       |                           | 0.11 (-0.11; 0.33)        | 0.1 <sup>a</sup>                    |
|                         | via MVPA |                          | -0.014 (-0.05; 0.013)     |                           |                                     |
|                         | MVPA     | -41.71 (-73.48; -9.94)** |                           | -41.71 (-73.48; -9.94)**  |                                     |
| <b>MVPA</b>             | SBP      | -0.0002 (-0.001; 0.001)  |                           | -0.0000 (-0.0012; 0.0011) | 0.3 <sup>a</sup>                    |
|                         | via BMI  |                          | 0.0001 (-0.0001; 0.0004)  |                           |                                     |
| <b>BMI</b>              | SBP      | 0.37 (0.21; 0.53)***     |                           | 0.37 (0.21; 0.53)***      |                                     |

Adjusted for age; \* P<0.05; \*\* P< 0.01; \*\*\*P< 0.001; SBP; systolic blood pressure, MVPA; moderate to vigorous intensity physical activity, BMI; body mass index, SES; social economic status, <sup>a</sup> Assessed using the absolute values for both indirect and direct effects

**Urban Fit Indices:** LR test of model vs. saturated: chi2(4) = 0.97, Prob > chi2 = 0.91; RMSEA = 0.00; **CFI= 1.00** Comparative fit index;

TLI= 1.12 Tucker-Lewis index; **SRMR=0.011:** Standardized root mean squared residual, CD= 0.017 Coefficient of determination.

1  
2  
3  
4  
5  
6  
7  
8  
9  
10  
11  
12  
13  
14  
15  
16  
17  
18  
19  
20  
21  
22  
23  
24  
25  
26  
27  
28  
29  
30  
31  
32  
33  
34  
35  
36  
37  
38  
39  
40  
41  
42  
43  
44  
45  
46  
47

**Table 3b:** Structural equation model for SES, MVPA and BMI on SBP in rural women

| Effect of:<br>N= 378    | Outcome:        | Direct effects(95% CI)   | Indirect effects( 95% CI) | Total effects(95% CI)    | Proportion of total effect mediated |
|-------------------------|-----------------|--------------------------|---------------------------|--------------------------|-------------------------------------|
| <b>Household assets</b> | SBP<br>via BMI  | -0.65 (-1.19; -0.096)*   | 0.08 (-0.04; 0.19)        | -0.56 (-1.12; -0.02)*    | 0.11 <sup>a</sup>                   |
|                         | BMI<br>via MVPA | 0.27 (0.01; 0.53)*       | -0.01 (-0.04; 0.01)       | 0.26 (-0.005; 0.53)*     | 0.04                                |
|                         | MVPA            | -29.51 (-87.81; 28.78)   |                           | -29.51 (-87.81; 28.78)   |                                     |
| <b>MVPA</b>             | SBP<br>via BMI  | 0.0004 (-.0005729 .0013) | 0.0001 (-0.0000; 0.0003)  | 0.0005 (-0.0005; 0.0015) | 0.2                                 |
|                         | SBP             |                          |                           |                          |                                     |
| <b>BMI</b>              | SBP             | 0.33 (0.12; 0.54)**      |                           | 0.33 (0.12; 0.54)**      |                                     |

Adjusted for age; \* P<0.05; \*\* P< 0.01; \*\*\*P< 0.001; SBP; systolic blood pressure, MVPA; moderate to vigorous physical activity, BMI; body mass index, SES; social economic status, <sup>a</sup> Assessed using the absolute values for both indirect and direct effects

**Rural Fit Indices:** LR test of model vs. saturated: chi2(4) = 10.51, Prob > chi2 = 0.03; RMSEA = 0.066; **CFI= 0.72** Comparative fit index; TLI= 0.37 Tucker-Lewis index; **SRMR= 0.04** : Standardized root mean squared residual, CD= 0.03 Coefficient of determination.

**Table 3c:** Structural equation model for SES, MVPA and BMI on SBP in the pooled sample of urban and rural women

| Effect of:<br>N=867     | Outcome: | Direct effects(95% CI)        | Indirect effects( 95% CI) | Total effects(95% CI)         | Proportion of total effect mediated |
|-------------------------|----------|-------------------------------|---------------------------|-------------------------------|-------------------------------------|
| <b>Household assets</b> | SBP      | 0.23 (-0.08; 0.54)            |                           | 0.46 (0.15; 0.76)**           | 0.5                                 |
|                         | via BMI  |                               | 0.23 (0.10; 0.35)***      |                               |                                     |
|                         | BMI      | 0.20 (0.05; 0.34)**           |                           | 0.15 (0.01; 0.29)*            | 0.25 <sup>a</sup>                   |
|                         | via MVPA |                               | -0.05 (-.100; 0.003)      |                               |                                     |
|                         | MVPA     | -144.83 (-170.55; -119.12)*** |                           | -144.83 (-170.55; -119.12)*** |                                     |
| <b>MVPA</b>             | SBP      | -0.001 (-0.002; -0.0005)**    |                           | -0.001 (-0.002; -0.0003)**    | 0.1 <sup>a</sup>                    |
|                         | via BMI  |                               | 0.0001 (-0.0000; 0.0002)  |                               |                                     |
| <b>BMI</b>              | SBP      | 0.35 (0.21; 0.49)***          |                           | 0.35 (0.21; 0.49)***          |                                     |

Adjusted for age; \* P<0.05; \*\* P< 0.01; \*\*\*P< 0.001; SBP; systolic blood pressure, MVPA; moderate to vigorous intensity physical activity, BMI; body mass index, SES; social economic status, <sup>a</sup> Assessed using the absolute values for both indirect and direct effects

**Pooled Fit Indices:** LR test of model vs. saturated:  $\chi^2(4) = 24.829$ , Prob >  $\chi^2 = 0.000$ ; RMSEA = 0.077; **CFI= 0.89** Comparative fit index; TLI= 0.75 Tucker-Lewis index; **SRMR=0.033**: Standardized root mean squared residual, CD=0.137 Coefficient of determination.



1  
2  
3  
4  
5  
6  
7  
8  
9  
10  
11  
12  
13  
14  
15  
16  
17  
18  
19  
20  
21  
22  
23  
24  
25  
26  
27  
28  
29  
30  
31  
32  
33  
34  
35  
36  
37  
38  
39  
40  
41  
42  
43  
44  
45  
46  
47

**Figure legends**

Figure 1: Structural equation model for SES, MVPA and BMI on SBP in urban

Figure 2: Structural equation model for SES, MVPA and BMI on SBP in rural

Figure 3: Structural equation model for SES, MVPA and BMI on SBP pooled

For peer review only

1  
2  
3  
4  
5  
6  
7  
8  
9  
10  
11  
12  
13  
14  
15  
16  
17  
18  
19  
20  
21  
22  
23  
24  
25  
26  
27  
28  
29  
30  
31  
32  
33  
34  
35  
36  
37  
38  
39  
40  
41  
42  
43  
44  
45  
46  
47  
48  
49  
50  
51  
52  
53  
54  
55  
56  
57  
58  
59  
60

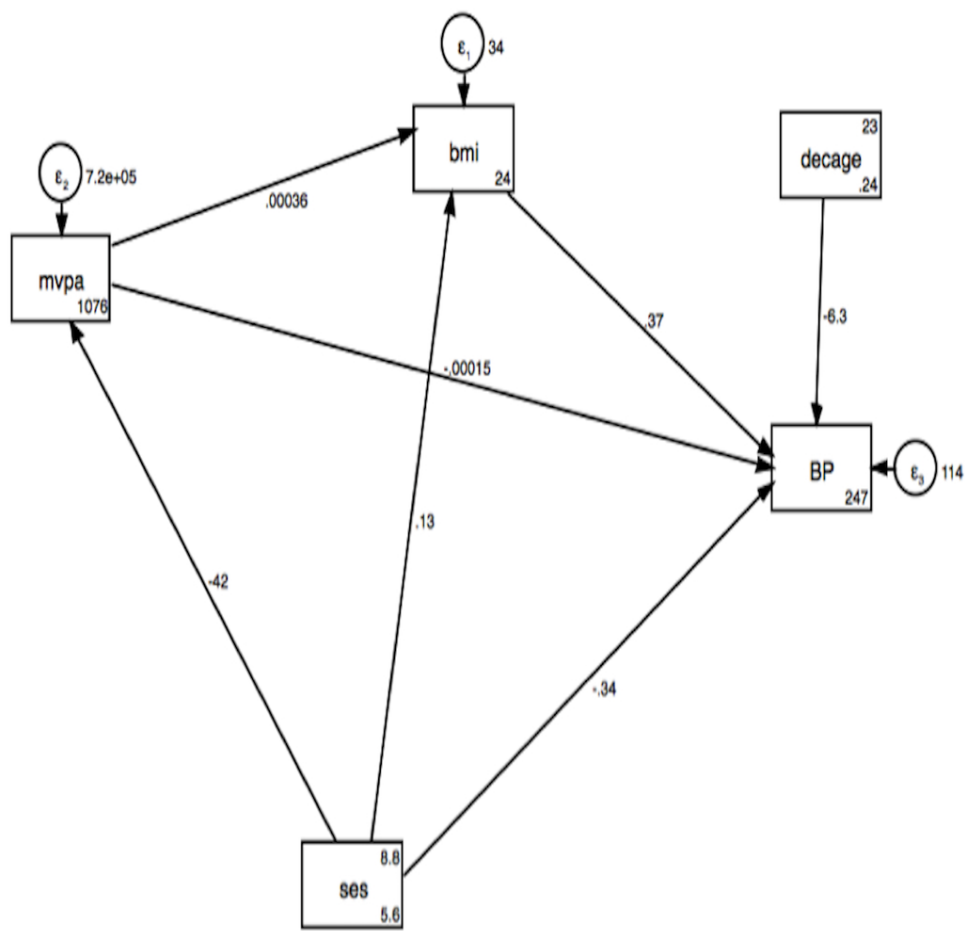

Structural equation model for SES, MVPA and BMI on SBP in urban

90x90mm (300 x 300 DPI)

1  
2  
3  
4  
5  
6  
7  
8  
9  
10  
11  
12  
13  
14  
15  
16  
17  
18  
19  
20  
21  
22  
23  
24  
25  
26  
27  
28  
29  
30  
31  
32  
33  
34  
35  
36  
37  
38  
39  
40  
41  
42  
43  
44  
45  
46  
47  
48  
49  
50  
51  
52  
53  
54  
55  
56  
57  
58  
59  
60

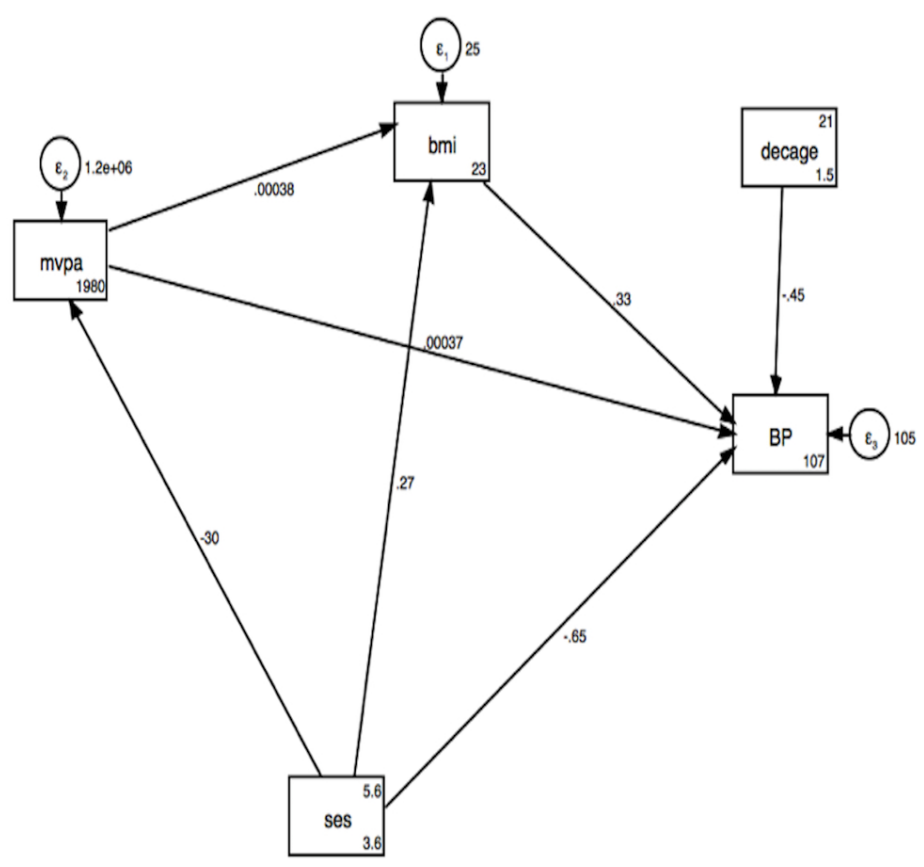

Structural equation model for SES, MVPA and BMI on SBP in rural  
90x90mm (300 x 300 DPI)

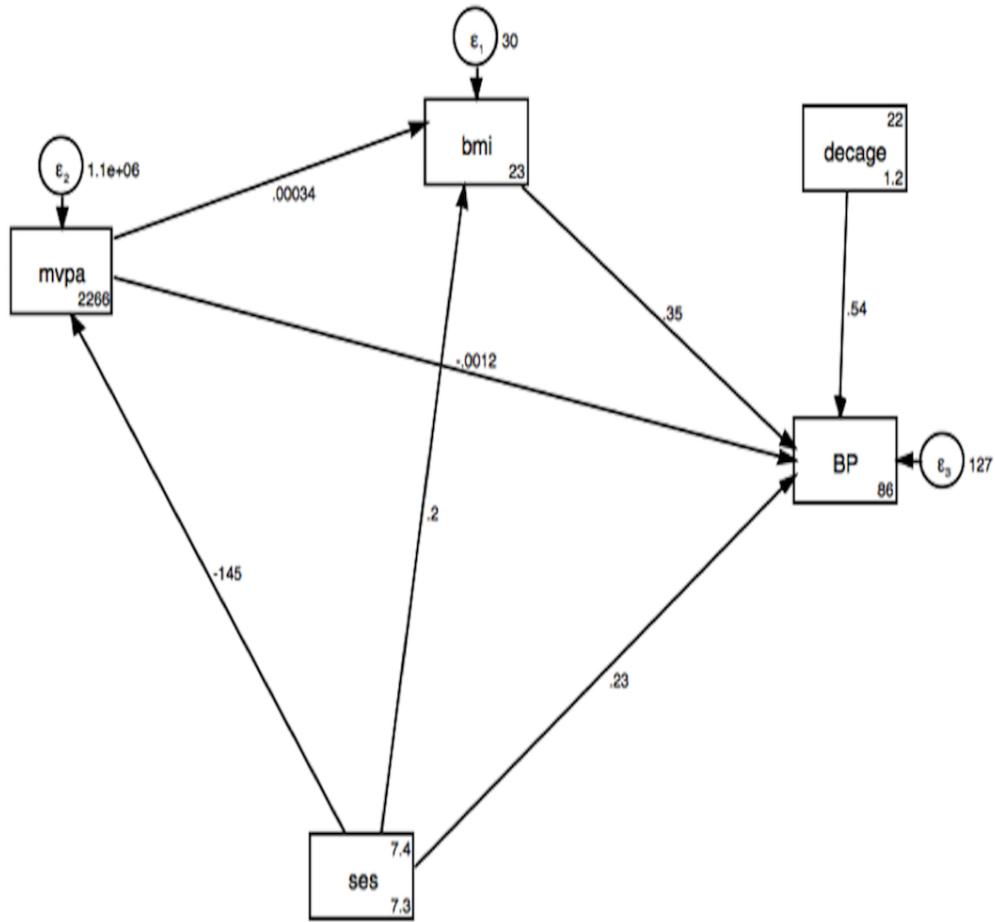

Structural equation model for SES, MVPA and BMI on SBP pooled

90x90mm (300 x 300 DPI)

## STROBE Statement—checklist of items that should be included in reports of observational studies

|                           | Item No | Recommendation                                                                                                                                                                                                                                                                                                                                                                                                                                                                                                                                                                                                                                                                                                                                                                   |
|---------------------------|---------|----------------------------------------------------------------------------------------------------------------------------------------------------------------------------------------------------------------------------------------------------------------------------------------------------------------------------------------------------------------------------------------------------------------------------------------------------------------------------------------------------------------------------------------------------------------------------------------------------------------------------------------------------------------------------------------------------------------------------------------------------------------------------------|
| <b>Title and abstract</b> | 1       | (a) Indicate the study's design with a commonly used term in the title or the abstract<br><b>MS Page 4 Par 2</b><br>(b) Provide in the abstract an informative and balanced summary of what was done and what was found <b>MS Page 4</b>                                                                                                                                                                                                                                                                                                                                                                                                                                                                                                                                         |
| <b>Introduction</b>       |         |                                                                                                                                                                                                                                                                                                                                                                                                                                                                                                                                                                                                                                                                                                                                                                                  |
| Background/rationale      | 2       | Explain the scientific background and rationale for the investigation being reported<br><b>MS Pages 5-6</b>                                                                                                                                                                                                                                                                                                                                                                                                                                                                                                                                                                                                                                                                      |
| Objectives                | 3       | State specific objectives, including any prespecified hypotheses<br><b>MS Page 6 Par 2</b>                                                                                                                                                                                                                                                                                                                                                                                                                                                                                                                                                                                                                                                                                       |
| <b>Methods</b>            |         |                                                                                                                                                                                                                                                                                                                                                                                                                                                                                                                                                                                                                                                                                                                                                                                  |
| Study design              | 4       | Present key elements of study design early in the paper<br><b>Methods: MS Page 6 Par 3</b>                                                                                                                                                                                                                                                                                                                                                                                                                                                                                                                                                                                                                                                                                       |
| Setting                   | 5       | Describe the setting, locations, and relevant dates, including periods of recruitment, exposure, follow-up, and data collection<br><b>Methods: MS Page 6 Par 3</b>                                                                                                                                                                                                                                                                                                                                                                                                                                                                                                                                                                                                               |
| Participants              | 6       | (a) <i>Cohort study</i> —Give the eligibility criteria, and the sources and methods of selection of participants. Describe methods of follow-up <b>N/A</b><br><br><i>Case-control study</i> —Give the eligibility criteria, and the sources and methods of case ascertainment and control selection. Give the rationale for the choice of cases and controls <b>N/A</b><br><i>Cross-sectional study</i> —Give the eligibility criteria, and the sources and methods of selection of participants <b>Methods: MS Page 6 Par 3</b><br>(b) <i>Cohort study</i> —For matched studies, give matching criteria and number of exposed and unexposed <b>N/A</b><br><i>Case-control study</i> —For matched studies, give matching criteria and the number of controls per case <b>N/A</b> |
| Variables                 | 7       | Clearly define all outcomes, exposures, predictors, potential confounders, and effect modifiers. Give diagnostic criteria, if applicable <b>Methods: MS Page 6 Par 4 – Page 8 Par 1</b>                                                                                                                                                                                                                                                                                                                                                                                                                                                                                                                                                                                          |
| Data sources/measurement  | 8*      | For each variable of interest, give sources of data and details of methods of assessment (measurement). Describe comparability of assessment methods if there is more than one group <b>Methods: MS Page 6 Par 4 – Page 8 Par 1</b>                                                                                                                                                                                                                                                                                                                                                                                                                                                                                                                                              |
| Bias                      | 9       | Describe any efforts to address potential sources of bias <b>Methods: MS Page 6 Par 3</b>                                                                                                                                                                                                                                                                                                                                                                                                                                                                                                                                                                                                                                                                                        |
| Study size                | 10      | Explain how the study size was arrived at <b>Methods: MS Page 6 Par 3</b>                                                                                                                                                                                                                                                                                                                                                                                                                                                                                                                                                                                                                                                                                                        |
| Quantitative variables    | 11      | Explain how quantitative variables were handled in the analyses. If applicable, describe which groupings were chosen and why <b>Methods: MS Page 8 Par 2</b>                                                                                                                                                                                                                                                                                                                                                                                                                                                                                                                                                                                                                     |
| Statistical methods       | 12      | (a) Describe all statistical methods, including those used to control for confounding<br><b>Statistical analyses: MS Page 8 Par 2 and 3</b><br>(b) Describe any methods used to examine subgroups and interactions <b>N/A</b><br>(c) Explain how missing data were addressed <b>Statistical analyses: MS Page 8 Par 2</b><br>(d) <i>Cohort study</i> —If applicable, explain how loss to follow-up was addressed<br><i>Case-control study</i> —If applicable, explain how matching of cases and controls was                                                                                                                                                                                                                                                                     |

1  
2 addressed N/A

3 *Cross-sectional study*—If applicable, describe analytical methods taking account of  
4 sampling strategy N/A

---

5 (e) Describe any sensitivity analyses N/A

6 Continued on next page

7  
8  
9  
10  
11  
12  
13  
14  
15  
16  
17  
18  
19  
20  
21  
22  
23  
24  
25  
26  
27  
28  
29  
30  
31  
32  
33  
34  
35  
36  
37  
38  
39  
40  
41  
42  
43  
44  
45  
46  
47  
48  
49  
50  
51  
52  
53  
54  
55  
56  
57  
58  
59  
60

For peer review only

## Results

|                  |     |                                                                                                                                                                                                                                                                                                                                                                                                                                                                  |
|------------------|-----|------------------------------------------------------------------------------------------------------------------------------------------------------------------------------------------------------------------------------------------------------------------------------------------------------------------------------------------------------------------------------------------------------------------------------------------------------------------|
| Participants     | 13* | (a) Report numbers of individuals at each stage of study—eg numbers potentially eligible, examined for eligibility, confirmed eligible, included in the study, completing follow-up, and analysed <b>Results: Page 8 Par 5 – Page 9 Par 1</b><br>(b) Give reasons for non-participation at each stage <b>N/A</b><br>(c) Consider use of a flow diagram <b>N/A</b>                                                                                                |
| Descriptive data | 14* | (a) Give characteristics of study participants (eg demographic, clinical, social) and information on exposures and potential confounders <b>Page 8 Par 5 – Page 9 Par 1</b><br>(b) Indicate number of participants with missing data for each variable of interest <b>Results: Page 8 Par 5</b><br>(c) <i>Cohort study</i> —Summarise follow-up time (eg, average and total amount) <b>N/A</b>                                                                   |
| Outcome data     | 15* | <i>Cohort study</i> —Report numbers of outcome events or summary measures over time <b>N/A</b><br><i>Case-control study</i> —Report numbers in each exposure category, or summary measures of exposure <b>N/A</b><br><i>Cross-sectional study</i> —Report numbers of outcome events or summary measures <b>Results: Page 8 Par 5</b>                                                                                                                             |
| Main results     | 16  | (a) Give unadjusted estimates and, if applicable, confounder-adjusted estimates and their precision (eg, 95% confidence interval). Make clear which confounders were adjusted for and why they were included <b>Results: Page 9 Par 1</b><br>(b) Report category boundaries when continuous variables were categorized <b>N/A</b><br>(c) If relevant, consider translating estimates of relative risk into absolute risk for a meaningful time period <b>N/A</b> |
| Other analyses   | 17  | Report other analyses done—eg analyses of subgroups and interactions, and sensitivity analyses <b>N/A</b>                                                                                                                                                                                                                                                                                                                                                        |

## Discussion

|                  |    |                                                                                                                                                                                                                |
|------------------|----|----------------------------------------------------------------------------------------------------------------------------------------------------------------------------------------------------------------|
| Key results      | 18 | Summarise key results with reference to study objectives <b>Discussion: Page 9 Par 2</b>                                                                                                                       |
| Limitations      | 19 | Discuss limitations of the study, taking into account sources of potential bias or imprecision. Discuss both direction and magnitude of any potential bias <b>Discussion: Page 11 Par 4</b>                    |
| Interpretation   | 20 | Give a cautious overall interpretation of results considering objectives, limitations, multiplicity of analyses, results from similar studies, and other relevant evidence <b>Page 9 Par 3 – Page 11 Par 3</b> |
| Generalisability | 21 | Discuss the generalisability (external validity) of the study results <b>Discussion: Page 9 Par 3 – Page 11</b>                                                                                                |

## Other information

|         |    |                                                                                                                                                                                             |
|---------|----|---------------------------------------------------------------------------------------------------------------------------------------------------------------------------------------------|
| Funding | 22 | Give the source of funding and the role of the funders for the present study and, if applicable, for the original study on which the present article is based <b>Funding: Page 12 Par 1</b> |
|---------|----|---------------------------------------------------------------------------------------------------------------------------------------------------------------------------------------------|

\*Give information separately for cases and controls in case-control studies and, if applicable, for exposed and unexposed groups in cohort and cross-sectional studies.

**Note:** An Explanation and Elaboration article discusses each checklist item and gives methodological background and published examples of transparent reporting. The STROBE checklist is best used in conjunction with this article (freely available on the Web sites of PLoS Medicine at <http://www.plosmedicine.org/>, Annals of Internal Medicine at <http://www.annals.org/>, and Epidemiology at <http://www.epidem.com/>). Information on the STROBE Initiative is available at [www.strobe-statement.org](http://www.strobe-statement.org).

# BMJ Open

## Body composition and physical activity as mediators in the relationship between socio-economic status and blood pressure in young South African women: A structural equation model analysis

|                                 |                                                                                                                                                                                                                                                                                                                                                                                                                                                                                                                                                                                                                                                                                                                                                                                                                                                                                                                                      |
|---------------------------------|--------------------------------------------------------------------------------------------------------------------------------------------------------------------------------------------------------------------------------------------------------------------------------------------------------------------------------------------------------------------------------------------------------------------------------------------------------------------------------------------------------------------------------------------------------------------------------------------------------------------------------------------------------------------------------------------------------------------------------------------------------------------------------------------------------------------------------------------------------------------------------------------------------------------------------------|
| Journal:                        | <i>BMJ Open</i>                                                                                                                                                                                                                                                                                                                                                                                                                                                                                                                                                                                                                                                                                                                                                                                                                                                                                                                      |
| Manuscript ID                   | bmjopen-2018-023404.R1                                                                                                                                                                                                                                                                                                                                                                                                                                                                                                                                                                                                                                                                                                                                                                                                                                                                                                               |
| Article Type:                   | Research                                                                                                                                                                                                                                                                                                                                                                                                                                                                                                                                                                                                                                                                                                                                                                                                                                                                                                                             |
| Date Submitted by the Author:   | 12-Jul-2018                                                                                                                                                                                                                                                                                                                                                                                                                                                                                                                                                                                                                                                                                                                                                                                                                                                                                                                          |
| Complete List of Authors:       | Munthali, Richard; University of the Witwatersrand, MRC/Wits Developmental Pathways for Health Research Unit<br>Manyema, Mercy; Wits University, Epidemiology and Biostatistics<br>Said-Mohamed, Rihlat; University of the Witwatersrand, MRC/Wits Developmental Pathways for Health<br>Kagura, Juliana; University of Witwatersrand, Paediatrics and Child health<br>Tollman, Stephen; University of the Witwatersrand,<br>Kahn, Kathleen; University of the Witwatersrand,<br>Gómez-Olivé, F. Xavier; University of the Witwatersrand, Medical Research Council/Wits Rural Health and Health Transitions Unit (Agincourt), School of Public Health, Faculty of Health Sciences<br>Micklesfield, Lisa; University of the Witwatersrand, MRC/Wits Developmental Pathways for Health Research Unit<br>Dunger, David; University of Cambridge, Paediatrics<br>Norris, Shane; University of Witwatersrand, Paediatrics and Child Health |
| <b>Primary Subject Heading</b>: | Epidemiology                                                                                                                                                                                                                                                                                                                                                                                                                                                                                                                                                                                                                                                                                                                                                                                                                                                                                                                         |
| Secondary Subject Heading:      | Public health, Epidemiology                                                                                                                                                                                                                                                                                                                                                                                                                                                                                                                                                                                                                                                                                                                                                                                                                                                                                                          |
| Keywords:                       | Hypertension < CARDIOLOGY, Obesity, Socioeconomic status, Physical activity, Structural equation model, Body mass index                                                                                                                                                                                                                                                                                                                                                                                                                                                                                                                                                                                                                                                                                                                                                                                                              |
|                                 |                                                                                                                                                                                                                                                                                                                                                                                                                                                                                                                                                                                                                                                                                                                                                                                                                                                                                                                                      |

SCHOLARONE™  
Manuscripts



1  
2  
3 1  
4 2 **Body composition and physical activity as mediators in the relationship between socio-economic status and**  
5 3 **blood pressure in young South African women: A structural equation model analysis**  
6 4  
7 5

8 6 Richard J Munthali<sup>1</sup>, Mercy Manyema<sup>1,2</sup>, Rihlat Said-Mohamed<sup>1</sup>, Juliana Kagura<sup>1</sup>, Stephen Tollman<sup>3,4,5</sup>, Kathleen  
9 7 Kahn<sup>3,4,5</sup>, F. Xavier Gómez-Olivé<sup>3</sup>, Lisa K. Micklesfield<sup>1</sup>, David Dunger<sup>6,1</sup>, Shane A. Norris<sup>1</sup>  
10  
11

12 8  
13 9 **Affiliations:**

14 10 <sup>1</sup>MRC/WITS Developmental Pathways for Health Research Unit, Department of Paediatrics, School of Clinical  
15 11 Medicine, Faculty of Health Sciences, University of the Witwatersrand, 7 York Rd, Parktown 2193, Johannesburg,  
16 12 South Africa

17  
18  
19 13 <sup>2</sup>DST-NRF Centre of Excellence in Human Development, University of the Witwatersrand, Johannesburg, South  
20 14 Africa

21  
22 15 <sup>3</sup>MRC/Wits Rural Public Health and Health Transitions Research Unit, School of Public Health, Faculty of Health  
23 16 Sciences, University of the Witwatersrand, Johannesburg, South Africa

24 17  
25 18 <sup>4</sup>INDEPTH Network, Accra, Ghana

26 19  
27 20 <sup>5</sup>Umeå Centre for Global Health Research, Sweden.

28 21  
29 22 <sup>6</sup>Department of Paediatrics, MRC Wellcome Trust-MRC Institute of Metabolic Science, NIHR Cambridge  
30 23 Comprehensive Biomedical Research Centre, University of Cambridge, Box 116, Addenbrooke's Hospital, Hills  
31 24 Road, Cambridge CB2 0QQ, UK  
32 25  
33 26

34 27 **Conflict of interest:** The views expressed in the submitted article are our own and not an official position of the  
35 28 affiliated institutions or funder. Authors have no financial relationships relevant to this article to disclose.  
36 29  
37  
38

39 30 **Corresponding Author:** Dr. Richard J. Munthali

40  
41  
42 31 MRC/Wits Developmental Pathways for Health Research Unit

43  
44 32 University of the Witwatersrand

45  
46 33 Johannesburg

47 34 Tel: +27119331122

48  
49 35 Email: munthali@aims.ac.za  
50  
51  
52  
53 36  
54 37  
55 38  
56 39  
57  
58  
59  
60

**Authors' emails:**

Richard Junganiko Munthali: munthali@aims.ac.za  
Mercy Manyema: mercy.manyema@gmail.com  
Rihlat Said-Mohamed: rihlat.saidmohamed@wits.ac.za  
Juliana Kagura: julianakagura@gmail.com  
Stephen Tollman: stephen.tollman@wits.ac.za  
Kathleen Kahn: kathleen.kahn@wits.ac.za  
F. Xavier Gómez-Olivé: F.Gomez-OliveCasas@wits.ac.za  
Lisa K. Micklesfield: lisa.micklesfield@wits.ac.za  
David Dunger: dbd25@cam.ac.uk  
Shane A Norris: shane.norris@wits.ac.za

1  
2  
3 87 **Abstract**

4 88

5 89 **Objectives** Varying hypertension prevalence across different socio-economic strata within a population has been  
6 90 well reported. However the causal factors and pathways across different settings are less clear, especially in sub-  
7 91 Saharan Africa. Therefore, this study aimed to compare blood pressure (BP) levels, and investigate the extent to  
8 92 which socioeconomic status (SES) is associated with blood pressure, in rural and urban South Africa women.  
9 93

10 94 **Setting** Rural and urban South Africa.  
11 95

12 96 **Design** Cross-sectional.  
13 97

14 98 **Participants** Cross-sectional data on SES, total moderate-vigorous physical activity (MVPA), anthropometric and  
15 99 blood pressure were collected on rural (n=509) and urban (n=510) young black women (18-23 years age). Pregnant  
16 100 and mentally or physically disabled women were excluded from the study.  
17 101

18 102 **Results** The prevalence of combined overweight and obesity (46.5% versus 38.8%) and elevated BP (27.0% versus  
19 103 9.3%) were higher in urban than rural women respectively. Results from the structural equation modelling showed  
20 104 significant direct positive effects of body mass index (BMI) on systolic BP (SBP) in rural, urban and pooled  
21 105 datasets. Negative direct effects of SES on SBP and positive total effects of SES on SBP were observed in the rural  
22 106 and pooled datasets respectively. In rural young women, SES had direct positive effects on BMI and was negatively  
23 107 associated with MVPA in urban and pooled analyses. BMI mediated the positive total effects association between  
24 108 SES and SBP in pooled analyses ( $\beta$ ; 95%CI, 0.46; 0.15 to 0.76).  
25 109

26 110 **Conclusions** Though South Africa is undergoing nutritional and epidemiological transitions; the prevalence of  
27 111 elevated BP still varies between rural and urban young women. The association between SES and SBP varies  
28 112 considerably in economically diverse populations with BMI being the most significant mediator. There is a need to  
29 113 tailor prevention strategies to take into account optimizing BMI when designing strategies to reduce future risk of  
30 114 hypertension in young women.  
31 115

32 116 **Keywords** Blood pressure, Body mass index, Hypertension, Obesity, Urban, Rural, Socioeconomic status,  
33 117 Structural equation model, Physical activity  
34 118  
35 119  
36 120  
37 121  
38 122  
39 123  
40 124  
41 125

1  
2  
3 126  
4 127  
5 128  
6 129  
7 130  
8  
9 131  
10  
11  
12

### Strengths

1. The use of structural equation modelling allowed us to explore direct and indirect (mediation) effects of social economic status, physical activity and body mass index on elevated blood pressure from a representative sample of rural and urban populations of South African young women.
2. Although the urban and rural cohorts were from two different studies, the same research unit conducted both studies and, therefore, the data collection and management process were consistent between the two sites, thereby allowing for accurate comparison.

### Limitations

1. Other unmeasured data, such as undernutrition in infancy, and dietary patterns were not included in the current analyses.
2. The low reliability of self-report data on physical activity could introduce bias. Thus, there is need for more accurate, objective measures of physical activity to strengthen the results of our analysis.
3. There is a need to do comparison on longitudinal data, especially as the socioeconomic environment is changing rapidly due to rural-urban labor migration and other factors would be helpful to examine these associations over time.

13  
14  
15  
16  
17  
18  
19  
20  
21  
22  
23  
24  
25  
26  
27  
28  
29  
30  
31  
32  
33  
34 132  
35 133  
36 134  
37 135  
38 136  
39 137  
40 138  
41 139  
42 140  
43 141  
44 142  
45 143  
46 144  
47 145  
48 146  
49 147  
50  
51  
52  
53  
54  
55  
56  
57  
58  
59  
60

## 148 Introduction

149  
150 High blood pressure (BP) or hypertension is a leading risk factor accounting for 7% of global disability-adjusted life  
151 years (DALYs) and contributing to the 34.5 million non-communicable disease (NCD) related deaths in 2010 [1, 2].  
152 A recent global meta-analysis, involving 19.1 million individuals, reported that on average there has been a decrease  
153 in BP globally, but low- to middle-income countries (LMICs) have seen an increase in hypertension [3]. The  
154 prevalence of high BP in LMICs is estimated at 30% [4, 5] and it is the most significant risk factor for  
155 cardiovascular disease, most notably stroke [6]. In 2000, hypertension was estimated to have caused 9% of all deaths  
156 and over 390 000 DALYs in South Africa. Further, hypertension contributed to 50% of all strokes and 42% of  
157 ischaemic heart disease (IHD), signifying a substantial public health burden [7]. A systematic review of sub-Saharan  
158 African (SSA) data shows prevalence rates of hypertension of up to 41% with higher prevalence rates noted in urban  
159 compared to rural populations [8, 9]. A study in men and women aged 40 to 60 years of age in six sites across four  
160 SSA countries, including South Africa, showed the same trend with South African urban and rural cohorts having  
161 the highest prevalence of hypertension (41.6 to 54.1%) [10].

162  
163 LMICs are experiencing both epidemiological and nutritional transitions with urban populations further along the  
164 transition as demonstrated by the higher prevalence of obesity and NCDs [4, 5, 8, 10-15]. Some evidence has shown  
165 that there are differences in the levels of BP between rural and urban settings [8], while other studies have found no  
166 significant differences [16]. According to Glass and McAtee, internal biological systems are sculpted by an  
167 interaction between genes and prolonged exposure to particular external environments, a principle they call  
168 embodiment [17]. Thus the differences in built and social environments between rural and urban settings may  
169 explain the differences in disease prevalence. A Ghanaian study showed that both systolic blood pressure (SBP) and  
170 diastolic blood pressure (DBP) were significantly lower in rural participants compared to urban participants [18].  
171 However, a similar study in adolescents found that BP levels were only lower in rural boys, with no difference in the  
172 girls [19]. Pediatric and adolescent hypertension have been reported to track into adulthood in a South African urban  
173 population [20]. Results on elevated BP from studies in rural South African children have reported prevalence rates  
174 varying from 1.0% to 25.4% [21-24]. The factors explaining these differences have not been fully studied in LMICs.

175  
176 Socioeconomic factors such as education, household income and household assets have been associated with BP  
177 levels [25-27]. In a US cohort of young adults, a higher household income remained associated with lower SBP even  
178 after controlling for all potential covariates including age, sex and bio-behavioral factors [28]. Similarly, in a French  
179 sample of 30-79 year olds, SBP independently increased and was inversely associated with both individual  
180 education and residential neighborhood education [29]. Studies in African countries have also found varying  
181 associations between socioeconomic status (SES) and BP patterns, with both positive and negative associations  
182 reported [8, 30, 31]. Some studies have speculated that the association between SES and body mass index (BMI),  
183 physical activity levels, diet, smoking, alcohol intake and malnutrition may influence BP patterns [18, 28, 31, 32].

1  
2  
3 184 Physical activity has been inversely associated with blood pressure and BMI directly associated with BP in more  
4 185 advanced economies, but inconsistent associations have been reported in LMICs [25, 33-37].

5 186  
6  
7 187 There is a need to examine BP and its determinants in young South African adults given the high rates of overweight  
8 188 and obesity and hypertension observed in this age group [20, 38]. Recent South African reports also indicate that the  
9 189 highest pregnancy rates occur in the age range of 20-24 years, with 26.2% of births reported, followed closely by the  
10 190 25-29 year age group (25.7%) [39], and therefore targeting young adult women would also reduce adverse health  
11 191 outcomes in their children. It is important to closely examine rural-urban differences in hypertension due to  
12 192 differences in the epidemiology of obesity and SES divergence in the South African context, in order to better suit  
13 193 interventions to the different settings [23, 26, 30, 40-43]. Therefore, this study aims to compare BP levels between  
14 194 rural and urban young adult South African women, and to determine whether there is an association between SES  
15 195 and BP, and whether it is mediated by physical activity and BMI.

## 196 197 **Methods**

### 198 **Study sample and site**

199 The rural Agincourt site, 2016 potential the female participants between the ages of 18 and 23 years were in the  
200 existing Agincourt Health and Socio-demographic Surveillance System database [44]. Only 996 were located during  
201 the data collection period and were invited to participate and of these, 509 female participants were recruited. The  
202 urban sample consisted of 510 young women between the ages of 22 and 23 years who were randomly selected  
203 from the sample of 720 females who were part of the Birth-to-Twenty plus (BT20+) Young Adult Survey [45, 46].  
204 Young women (n=51; 33 in rural and 18 in urban) who were pregnant at the time of the study were excluded, see the  
205 study design flow chart in **Figure 1**. Measurements and questionnaires were completed by trained research assistants  
206 and nurses, and were standardised between both sites, to eliminate biases. The study protocols were approved by the  
207 Human Research Ethics Committee of the University of the Witwatersrand (Clearance certificates M120138 for the  
208 Ntshembo-Hope Cross Sectional Survey in Agincourt and M111182 for the BT20+ survey). Written consent to  
209 participate was provided by participants, and mentally or physically disabled women were excluded from the study.

### 210 **Patient and Public Involvement**

211 No patients private or public were involved in this study, as it was a community population based.

### 212 213 **Blood pressure**

214 Blood pressure (mm Hg) was the outcome variable and it was measured using an Omron 6 automated machine  
215 (Kyoto, Japan). A five minute seated rest was observed before taking the BP measurements. Participants' seated BP  
216 was measured three times on the right side, with a 2-minute interval between each measurement. The mean for the

217 second and third readings was recorded for the current analysis. We had various cuff sizes and the appropriate size  
218 was used to accommodate differences in arm circumference.

219  
220 According to the Seventh Report of the Joint National Committee on Prevention, Detection, Evaluation, and  
221 Treatment of High Blood Pressure [47], five categories of BP have been established for adults 18 years of age and  
222 older as shown in Table 1. These cut-offs were utilized in the current study. Prehypertension and hypertension were  
223 combined to create a new variable called elevated BP.

224  
225 **Table 1:** Blood pressure classification [47]

| Classification             | Systolic<br>Blood Pressure | or  | Diastolic<br>Blood Pressure |     |
|----------------------------|----------------------------|-----|-----------------------------|-----|
| Low                        | <90                        | or  | < 60                        | 226 |
| Normal                     | <120                       | and | <80                         | 227 |
| Prehypertension            | 120-139                    | or  | 80-90                       | 228 |
| High: Stage 1 Hypertension | 140-159                    | or  | 90-99                       | 229 |
| High: Stage 2 hypertension | ≥160                       | or  | ≥100                        | 230 |
|                            |                            |     |                             | 231 |
|                            |                            |     |                             | 232 |
|                            |                            |     |                             | 233 |
|                            |                            |     |                             | 234 |

235 SBP was used in structural equation models (SEM) as it is more relevant in adults, and a good predictor of adverse  
236 health outcomes later in life [48], such as CVDs.

### 237 Anthropometry

238 At both sites, participants' height and weight were measured by trained research assistants using standard techniques  
239 [49, 50] . Weight was measured in light clothing and barefoot to the nearest 0.1 kg using a digital scale (Tanita  
240 model TBF-410; Arlington Heights; USA). Height was measured barefoot to the nearest 0.1 cm using a  
241 stadiometer (Holtain, Crymych, UK). Waist circumference was measured with a non-stretchable fibreglass tape at  
242 the level of the umbilicus. BMI was calculated as weight/height<sup>2</sup> (kg/m<sup>2</sup>).

243

244

### 245 Socio-economic status (SES)

1  
2  
3 246 Physical assets owned in the participants' household were used as a proxy for SES index [51]. It was generated by  
4 247 summing the number of assets owned in the household from the following: television, car, washing machine, fridge,  
5 248 phone, radio, microwave, cell phone, DVD/Video, DSTV (cable channel), computer, internet, medical aid. Previous  
6 249 studies in this population have shown that the sum of physical assets (household assets) is closely related to the  
7 250 household per capital expenditure and household income [51-53]. The household SES is regarded as a good measure  
8 251 of accumulated household wealth so it is a more reflective wealth index than income of a household's wealth over  
9 252 time.

### 14 253 **Physical activity**

16 254 The Global Physical Activity Questionnaire (GPAQ), developed for global physical activity surveillance, was  
17 255 completed via interview to obtain self-reported physical activity [54]. Total MVPA in minutes per week (mins/wk)  
18 256 was calculated by adding occupation, travel-related and leisure time moderate and vigorous intensity physical  
19 257 activity. Sitting time (mins/wk) was used as a proxy for sedentary time.

### 23 258 **Statistical analyses**

25 259 Analysis of variance and student's t test, and Chi-squared tests and Wilcoxon rank sum test for non-parametric  
26 260 variables, were conducted to compare study characteristics between urban and rural young women. Structural  
27 261 equation modeling (SEM), with missing data option, was used to test and estimate the direct and indirect  
28 262 associations between variables, most especially the mediation roles of physical activity (MVPA) or sedentary time  
29 263 (sitting), and body composition (BMI and WC), in the association between SES and SBP. SEMs allow us to assess  
30 264 the mediation effects of multiple mediators [55]. SEM decomposed SES-BP associations into two parts, direct  
31 265 (unmediated) and indirect (mediated through MVPA/sitting and BMI/WC).

36 266 Direct, indirect and total effects were computed and recorded, and the proportion of the total effect mediated was  
37 267 calculated. To evaluate the best fitting model for our data, we calculated different goodness of fit indices including  
38 268 Chi-squared test, Root mean squared error of approximation (RMSEA), Comparative fit index (CFI), Tucker-Lewis  
39 269 index (TLI) and Standardized root mean squared residual (SRMR) [56]. Though the Chi-squared test has been  
40 270 popularly used as a goodness of fit index, it has been reported to be biased and not reliable as the only goodness of  
41 271 fit index. It is also highly sensitive to sample size [57, 58], and often inflated with non-normal data such as physical  
42 272 activity data and we therefore employed the Hu and Bentler's Two-Index Presentation Strategy (1999) combination  
43 273 rule, with cut off values depending on the fitness index, to determine the best model fit [56, 59]. We estimated the  
44 274 coefficients ( $\beta$ ) with 95% confidence intervals (95% CI) for the direct, indirect and total effects and also calculated  
45 275 the proportion of association mediated by indirect effects. If the direct and indirect effects had opposite signs  
46 276 (negative or positive effects) the proportion mediated was assessed using the absolute values for all indirect and  
47 277 direct effects [60].

54 278 All the analyses were conducted using STATA (version 13.0; STATA Corp., College Station, TX, USA). We  
55 279 confirmed SEM results by running the SEM with the Satorra-Bentler and Huber-White (Robust) Sandwich



280 Estimator options [61] in STATA (version 15.1; STATA Corp., College Station, TX, USA). These options relax the  
281 normality assumption hence are robust to non-normal data, which would be the case for mvpa and SES in the  
282 current study. A P-value < 0.05 was considered statistically significant.

283

284

## 285 **Results**

### 286 **Study characteristics**

287 Descriptive statistics for the non-pregnant study participants (urban, n=492; rural, n=476) are presented in Table 2.  
288 There was no difference in BMI or waist circumference between the urban and rural participants, but the prevalence  
289 of overweight and obesity was significantly higher in the urban (46.5%) compared to the rural young women  
290 (38.8%). Household SES was significantly higher in the urban compared to the rural group. Self-reported MVPA  
291 was significantly higher in the rural than urban women ( $p < 0.001$ ), and the urban women spent significantly more  
292 time sitting than their rural counterparts ( $p < 0.001$ ). Systolic and diastolic BP were significantly higher in the urban  
293 group, as was the prevalence of elevated BP (27.0 vs. 9.3%).

294

### 295 **Structural equation models for body mass index and Waist circumference**

296 Results from the SEMs for SES associations with SBP via MVPA and BMI are presented in Tables 3a, 3b and 3c for  
297 urban, rural and pooled analyses respectively, and also shown in Figures 1, 2, 3. No significant direct or indirect  
298 effects via (MVPA or BMI) of SES on SBP were observed in either the urban or rural women, but there were  
299 significant direct effects of SES on MVPA. Results showed that individuals with a higher SES index were less likely  
300 to be physically active in pooled data and urban women. In rural women, a one-unit increase in total household  
301 assets was associated with a decrease of 0.65 mmHg (95% CI: -1.19 to -0.10) in SBP and an increase of 0.27 kg/m<sup>2</sup>  
302 in BMI (95% CI: 0.1 to 0.53) (**Tables 3a, 3b and Figures 2, 3**). The SEM for the pooled sample showed a  
303 significant indirect effect of household SES on SBP via BMI, with 50% of the total effect being mediated by BMI  
304 (**Table 3c and Figure 4**). Direct positive effects of BMI on SBP were observed in both settings and the pooled  
305 sample with a 1 kg/m<sup>2</sup> increase in BMI being associated with an increase of 0.37 mmHg (95% CI: 0.21 to 0.53) and  
306 0.33 (95% CI: 0.12 to 0.54) mmHg SBP in urban and rural young women, respectively. Similar results were  
307 observed when including waist circumference as the body composition indicator (data not shown).

308

## 309 **Discussion**

1  
2  
3 310 A rising prevalence of hypertension has been reported in South Africa. Peer and colleagues reported a higher  
4 311 prevalence in 2008 (35.6%) compared to 1990 (21.6 %) in men and women aged 25-74 years in an urban black  
5 312 community in Cape Town, South Africa [40]. We have shown in young adult women from urban and rural South  
6 313 Africa, an overall elevated BP prevalence of 18.4 % (27.0 % in urban and 9.3 % in rural). We have also shown a  
7 314 direct effect of BMI on SBP in the urban and rural women separately, as well as when pooled, thereby providing  
8 315 further evidence of an association between overall adiposity and blood pressure. The total effects of SES on SBP  
9 316 were the same in both settings.

13  
14 317 Prevalence data on elevated BP and hypertension from other countries in SSA have shown conflicting results when  
15 318 comparing urban and rural communities. In Malawi, a higher prevalence of hypertension in urban compared to rural  
16 319 communities has been reported and attributed to differences in lifestyle as rural communities participate in  
17 320 subsistence based agricultural activities while the urban community has a more westernized lifestyle with higher salt  
18 321 intake and lower physical inactivity [9]. Similarly, data from Ghana have shown a higher mean SBP and DBP and a  
19 322 higher prevalence of hypertension in urban communities [18, 62]. In the PURE study in South Africa, Pisa and  
20 323 colleagues reported that both urban adult men and women had higher mean blood pressures in comparison to their  
21 324 rural peers though the overall CVD risk factors were equally prevalent in both settings [41]. In contrast, findings  
22 325 from Cameroon have reported a higher BP prevalence in rural compared to urban men and women older than 40  
23 326 years old, while Kenyan studies have reported no significant differences [16, 63]. Results from six urban and rural  
24 327 sites in four SSA countries – Kenya, South Africa, Ghana and Burkina Faso – have reported a prevalence of  
25 328 hypertension in women aged between 40 and 60 years ranging from 15.1% in rural Burkina Faso to 54.1% in urban  
26 329 South Africa [10]. It was also reported that in all three South African sites, both rural and urban, the prevalence of  
27 330 hypertension was higher than in the other three countries [10]. These findings show the complex health transitions  
28 331 occurring in SSA and the impact that this is having on cardio-metabolic disease risk.

32  
33  
34  
35  
36 332 Our study showed significant differences in SES between the urban and rural samples, as well a big variation in SES  
37 333 within these two settings. The social patterning of CVD risk factors, including hypertension, in SSA and LMICs has  
38 334 in part been attributed to differences in countries' socioeconomic development. Previous results from five countries,  
39 335 (two high income and three LMICs), reported that hypertension and other CVD risk factors were substantially  
40 336 associated with education and wealth status; individuals with less education and lower wealth generally showing  
41 337 higher prevalence of CVD risk factors [64]. The effect of SES in this study is most evident in the rural women for  
42 338 whom household SES was lower (compared to urban) and who may be transitioning faster (both nutritionally and  
43 339 economically) than the urban young women. Though SES is positively associated with BMI in rural young women,  
44 340 it is negatively associated with SBP. There may be other factors, such as physical activity due to agricultural  
45 341 activities or dietary patterns, which were not recorded. In addition, the weight gain observed might not be due to fat  
46 342 mass, which has been reported to be positively associated with SBP before [65], but rather to muscle mass and bone  
47 343 mass.

53  
54 344 In Mexico, women in rural and upper SES categories were likely to have a higher SBP, while we have reported that  
55 345 a higher SES was associated with a decrease in SBP in rural communities. At a population level, there is a need to

1  
2  
3 346 consider different SES categories and monitor the effects of transitioning from one SES category to another on  
4 347 hypertension, since these categories may respond differently to an increase or a decrease in their SES. Kagura and  
5 348 colleagues tracked SES in South African children and reported that moving from the low SES in infancy to a higher  
6 349 SES in adolescence had a protective effect on SBP level in young adulthood [26]. Our results have shown that this  
7 350 could be more pronounced in rural areas.

10  
11 351 We observed a positive association between SES and BMI in the rural sample and the same direction of effects was  
12 352 observed in the urban, though not significant. This is in line with results reported in many LMICs including South  
13 353 Africa, but in contrast with those reported in higher income populations [33, 34, 64]. A systematic review of studies  
14 354 between 1989 to 2007 reported that SES was positively associated with obesity in the middle transitioning  
15 355 economies such as South Africa and Jamaica [66]. We have shown that both in the rural and urban participants (not  
16 356 significant), a higher SES resulted in reduced SBP, while the pooled analysis showed a positive total effect  
17 357 association between SES and SBP. This could be due to the introduction of more variation in SES when data from  
18 358 both sites are pooled; with many individuals with low SES in the rural area, the associations became skewed towards  
19 359 the low SES individuals. This may suggest that different transitional levels of SES have different effects on  
20 360 hypertension risk depending on the environment (either urban or rural). Though not significant, the total effects of  
21 361 SES on SBP are the same in both rural and urban hence the differences in prevalence cannot be explained by the  
22 362 setting or SES alone. In urban and rural settings of four countries (Kenya, Namibia, Nigeria and Tanzania), the  
23 363 prevalence of age standardized hypertension was similarly high and ranging from 19.3 % to 38.0 % [11]. Cois and  
24 364 colleagues reported that a higher SES was associated with lower SBP in a nationally representative sample of South  
25 365 African women [25] using SEM models. Alcohol use, PA, smoking and resting heart rate and BMI were reported to  
26 366 be the mediators of the indirect of the association between SES and SBP in men but not in women, suggesting that  
27 367 other factors may play a major role in women [25]. Similarly, our results show that neither PA nor BMI mediate the  
28 368 association between SES and SBP in urban and rural settings, suggesting that other factors may explain the  
29 369 association. Among those, dietary patterns and stress have been reported to be independently associated with SBP  
30 370 [67, 68].

31  
32  
33  
34  
35  
36  
37  
38  
39  
40  
41 371 The significant direct associations between BMI and SBP are in line with other findings in South Africa and within  
42 372 the SSA region [11, 33, 40, 42, 69, 70]. This link was consistent in rural, urban and pooled data sets, indicating the  
43 373 importance of BMI in the aetiology of high BP. Munthali and colleagues reported that the link between obesity and  
44 374 hypertension could be observed as early as five years of age. Children with early onset of obesity were at higher risk  
45 375 of developing hypertension in late adolescence [38].

46  
47  
48  
49 376 In this study, using SEM models to explore the mediation role of BMI and PA helped quantify potential  
50 377 contributions of these variables to the effect of SES on SBP. The results show that PA was not a significant mediator  
51 378 in the association between SES and BP in the urban or the rural samples. SES was negatively associated with  
52 379 MVPA in urban and pooled samples, indicating that as individuals transition from low to higher SES, they reduce  
53 380 their physical activity level. We speculate that these differences in the association between SES and SBP in both our  
54 381 rural and urban results and in those from high-income countries are due to differences in levels of nutritional and  
55  
56  
57  
58  
59  
60

1  
2  
3 382 epidemiological transition in these regions [71, 72]. Those with low SES in high-income countries are likely to  
4 383 consume cheaper, more energy dense foods, participate in less leisure time PA and be more sedentary [73, 74] In  
5 384 LMICs, agricultural activities remain a part of everyday life and a day-to-day activity in rural living, while those  
6 385 with higher SES in the same settings rapidly adopt the westernized life style with less PA, fewer agricultural  
7 386 activities and home grown food. However, this speculation is not supported by the data on PA in this study despite  
8 387 the rural participants having a higher PA. Our understanding of the Agincourt rural economy is that agriculture is  
9 388 quite a minor aspect though very useful to augment the household income.

10 389 The limitations of this study are that other unmeasured data, such as undernutrition in infancy, which is a known risk  
11 390 factor for high BP later in life [75], and dietary patterns were not included in the current analyses. We are currently  
12 391 working on research to address this limitation. We can also not rule out the role of genetics. Secondly, the low  
13 392 reliability of self-report data on PA could introduce bias. Thus, there is need for more precise, objective measures of  
14 393 physical activity to strengthen the results of our analysis. Lastly, longitudinal data, especially as the socioeconomic  
15 394 environment is changing rapidly due to rural-urban labor migration and other factors would be helpful to examine  
16 395 these associations over time. The cross-sectional design lacks a temporal component between the factors analyzed.  
17 396 Thus, it is difficult to say anything certain about the direction of the associations, hence the need for the longitudinal  
18 397 data.

19 398

## 20 399 **Conclusions**

21 400 Though the prevalence of overweight or obesity is relatively higher in both rural and urban than those reported in  
22 401 other SSA countries, women in the urban setting were at more risk for elevated blood pressure than their rural  
23 402 counterparts. The link between SES and SBP varies in a more economically diverse population, as seen with the  
24 403 pooled rural and urban dataset, with BMI being the most likely mediator. There is need to consider optimizing BMI  
25 404 as a key intervention strategy in young adults in part to combat hypertension. Our findings should be replicated with  
26 405 prospective data.

27 406

## 28 407 **Funding**

29 408 Norris is supported by the UK MRC DfID African Research Leader Scheme and by the DST-NRF Centre of  
30 409 Excellence in Human Development at the University of the Witwatersrand, Johannesburg. Birth to Twenty data  
31 410 collection was supported by the Wellcome Trust under Grant [092097/Z/10/Z]. The MRC/Wits- Agincourt Unit is  
32 411 supported by the South African Medical Research Council, and the Wellcome Trust under Grants [058893/Z/99/A,  
33 412 069683/Z/02/Z, 085477/Z/08/Z, 085477/B/08/Z]. Opinions expressed and conclusions arrived at, are those of the  
34 413 authors and are not to be attributed to the CoE in Human Development.

## 35 414 **Conflict of interest**

1  
2  
3 415 Authors have no conflicts of interest to disclose.

4 416 **Consent for publication**

5  
6 417 Not applicable

7 418 **Data Sharing**

8  
9 419 The datasets used and/or analysed during the current study are available from the Developmental Pathways  
10 420 for Health Research Unit data management department by contacting Prof. Shane A Norris on reasonable request

11 421 **Competing interest**

12 422 The authors declare that they have no competing interests

13 423 **Authors' contributions**

14 424 RJM and SAN conceptualized the manuscript. RJM analyzed the data. RJM MM RSM JK ST KK FXG LKM DD  
15  
16 425 SAN interpreted the data. RJM wrote the manuscript and all authors were involved in editing and approving the final  
17  
18 426 manuscript.

19 427 **Acknowledgements**

20 428 We wish to thank the Bt20+ and Agincourt participants for taking part in the study and the Bt20+ and Agincourt  
21  
22 429 team for their relentless support throughout the study.

23 430

24 431 **Ethics Approval and Consent to Participate**

25 432 Prior to the study, the study protocols were approved by the Human Research Ethics Committee of the University of  
26  
27 433 the Witwatersrand (Clearance certificates M120138 for the Ntshembo-Hope Cross Sectional Survey in Agincourt  
28  
29 434 and M111182 for the BT20+ survey). Independent written informed consent to participate was obtained from  
30  
31 435 participants.

32 436

33 437

34 438

35 439

36 440

37 441

38 442

39 443

40 444

41 445

446 **References**

- 447 1. Lim SS, Vos T, Flaxman AD, Danaei G, Shibuya K, Adair-Rohani H, AlMazroa MA, Amann M,  
448 Anderson HR, Andrews KG *et al*: **A comparative risk assessment of burden of disease  
449 and injury attributable to 67 risk factors and risk factor clusters in 21 regions, 1990–  
450 2010: a systematic analysis for the Global Burden of Disease Study 2010.** *The Lancet*  
451 2012, **380**(9859):2224-2260.
- 452 2. Lozano R, Naghavi M, Foreman K, Lim S, Shibuya K, Aboyans V, Abraham J, Adair T,  
453 Aggarwal R, Ahn SY: **Global and regional mortality from 235 causes of death for 20 age  
454 groups in 1990 and 2010: a systematic analysis for the Global Burden of Disease  
455 Study 2010.** *The Lancet* 2013, **380**(9859):2095-2128.
- 456 3. Ezzati M, Geleijnse J: **Worldwide trends in blood pressure from 1975 to 2015.** *The  
457 Lancet* 2017, **389**(10064):37-55.
- 458 4. Sarki AM, Nduka CU, Stranges S, Kandala N-B, Uthman OA: **Prevalence of Hypertension in  
459 Low- and Middle-Income Countries: A Systematic Review and Meta-Analysis.** *Medicine*  
460 2015, **94**(50):e1959.
- 461 5. Chow CK, Teo KK, Rangarajan S, Islam S, Gupta R, Avezum A, Bahonar A, Chifamba J,  
462 Dagenais G, Diaz R: **Prevalence, awareness, treatment, and control of hypertension in  
463 rural and urban communities in high-, middle-, and low-income countries.** *Jama* 2013,  
464 **310**(9):959-968.
- 465 6. Kearney PM, Whelton M, Reynolds K, Muntner P, Whelton PK, He J: **Global burden of  
466 hypertension: analysis of worldwide data.** *The lancet* 2005, **365**(9455):217-223.
- 467 7. Norman R, Gaziano T, Laubscher R, Steyn K, Bradshaw D, Collaboration SACRA: **Estimating  
468 the burden of disease attributable to high blood pressure in South Africa in 2000.**  
469 *South African Medical Journal* 2007, **97**(8):692-698.
- 470 8. Addo J, Smeeth L, Leon DA: **Hypertension in Sub-Saharan Africa a systematic review.**  
471 *Hypertension* 2007, **50**(6):1012-1018.
- 472 9. Simmons D, Barbour G, Congleton J, Levy J, Meacher P, Saul H, Sowerby T: **Blood pressure  
473 and salt intake in Malawi: an urban rural study.** *Journal of epidemiology and community  
474 health* 1986, **40**(2):188-192.
- 475 10. Gómez-Olivé FX, Ali SA, Made F, Kyobutungi C, Nonterah E, Micklesfield L, Alberts M, Boua R,  
476 Hazelhurst S, Debpuur C: **Stark Regional and Sex Differences in the Prevalence and  
477 Awareness of Hypertension: An H3Africa AWI-Gen Study Across 6 Sites in Sub-  
478 Saharan Africa.** *Global Heart* 2017.
- 479 11. Hendriks ME, Wit FW, Roos MT, Brewster LM, Akande TM, de Beer IH, Mfinanga SG, Kahwa  
480 AM, Gatongi P, Van Rooy G: **Hypertension in sub-Saharan Africa: cross-sectional  
481 surveys in four rural and urban communities.** *PloS one* 2012, **7**(3):e32638.
- 482 12. Lemogoum D, Seedat YK, Mabadeje AF, Mendis S, Bovet P, Onwubere B: **International  
483 Forum for Hypertension control and prevention in Africa. Recommendations for  
484 prevention, diagnosis and management of hypertension and cardiovascular risk  
485 factors in sub-Saharan Africa.** *J Hypertens* 2003, **21**.
- 486 13. Schutte A, Botha S, Fourie C, Gafane-Matemane L, Kruger R, Lammertyn L, Malan L, Mels C,  
487 Schutte R, Smith W: **Recent advances in understanding hypertension development in  
488 sub-Saharan Africa.** *Journal of Human Hypertension* 2017.
- 489 14. Thorogood M, Connor MD, Lewando Hundt G, Tollman SM: **Understanding and managing  
490 hypertension in an African sub-district: A multidisciplinary approach1.** *Scandinavian  
491 Journal of Public Health* 2007, **35**(69 suppl):52-59.
- 492 15. Yusufali A, Khatib R, Islam S, AlHabib K, Kelishadi R, Rangarajan S, Yusuf S: **LBOS 03-01  
493 PREVALENCE, AWARENESS, TREATMENT, AND CONTROL OF HYPERTENSION IN THE**



- 1  
2  
3 494 **MIDDLE EAST: RESULTS FROM THE PROSPECTIVE URBAN RURAL EPIDEMIOLOGY**  
4 495 **(PURE) STUDY.** *J Hypertens* 2016, **34 Suppl 1**:e551.
- 5 496 16. Poulter N, Khaw K, Hopwood B, Mugambi M, Peart W, Rose G, Sever P: **Blood pressure and**  
6 497 **its correlates in an African tribe in urban and rural environments.** *Journal of*  
7 498 *epidemiology and community health* 1984, **38(3)**:181-185.
- 8 499 17. Glass TA, McAtee MJ: **Behavioral science at the crossroads in public health: extending**  
9 500 **horizons, envisioning the future.** *Social science & medicine* 2006, **62(7)**:1650-1671.
- 10 501 18. Agyemang C: **Rural and urban differences in blood pressure and hypertension in**  
11 502 **Ghana, West Africa.** *Public Health* 2006, **120**.
- 12 503 19. Agyemang C, Redekop WK, Owusu-Dabo E, Bruijnzeels MA: **Blood pressure patterns in**  
13 504 **rural, semi-urban and urban children in the Ashanti region on Ghana, West Africa.**  
14 505 *BMC Public Health* 2005, **5**.
- 15 506 20. Kagura J, Adair LS, Musa MG, Pettifor JM, Norris SA: **Blood pressure tracking in urban**  
16 507 **black South African children: birth to twenty cohort.** *BMC pediatrics* 2015, **15(1)**:1.
- 17 508 21. Goon D, Amusa L, Mhlongo D, Khoza L, Any-Anwu F: **Elevated blood pressure among**  
18 509 **Rural South African Children in Thohoyandou, South Africa.** *Iran J Pub Health* 2013, **42**.
- 19 510 22. Kemp C, Pienaar AE, Schutte AE: **The prevalence of hypertension and the relationship**  
20 511 **with body composition in Grade 1 learners in the North West Province of South**  
21 512 **Africa.** *South African Journal of Sports Medicine* 2011, **23(4)**.
- 22 513 23. Monyeki K, Kemper H, Makgae P: **The association of fat patterning with blood pressure**  
23 514 **in rural South African children: the Ellisras Longitudinal Growth and Health Study.**  
24 515 *International journal of epidemiology* 2006, **35(1)**:114-120.
- 25 516 24. Schutte A, Van Rooyen J, Huisman H, Kruger H, Malan N, De Ridder J: **Dietary risk markers**  
26 517 **that contribute to the aetiology of hypertension in black South African children: the**  
27 518 **THUSA BANA study.** *Journal of human hypertension* 2003, **17(1)**:29-35.
- 28 519 25. Cois A, Ehrlich R: **Analysing the socioeconomic determinants of hypertension in South**  
29 520 **Africa: a structural equation modelling approach.** *BMC public health* 2014, **14(1)**:414.
- 30 521 26. Kagura J, Adair LS, Pisa PT, Griffiths PL, Pettifor JM, Norris SA: **Association of**  
31 522 **socioeconomic status change between infancy and adolescence, and blood pressure,**  
32 523 **in South African young adults: Birth to Twenty Cohort.** *BMJ open* 2016, **6(3)**:e008805.
- 33 524 27. Wilson DK, Kliewer W, Plybon L, Sica DA: **Socioeconomic status and blood pressure**  
34 525 **reactivity in healthy black adolescents.** *Hypertension* 2000, **35(1)**:496-500.
- 35 526 28. Brummett BH, Babyak MA, Siegler IC, Shanahan M, Harris KM, Elder GH, Williams RB:  
36 527 **Systolic Blood Pressure, Socioeconomic Status, and Biobehavioral Risk Factors in a**  
37 528 **Nationally Representative US Young Adult Sample.** *Hypertension* 2011, **58(2)**:161-166.
- 38 529 29. Chaix B, Bean K, Leal C, Thomas F, Havard S, Evans D, Jégo B, Pannier B:  
39 530 **Individual/Neighborhood Social Factors and Blood Pressure in the RECORD Cohort**  
40 531 **Study.** *Which Risk Factors Explain the Associations?* 2010, **55(3)**:769-775.
- 41 532 30. Griffiths PL, Sheppard ZA, Johnson W, Cameron N, Pettifor JM, Norris SA: **Associations**  
42 533 **between household and neighbourhood socioeconomic status and systolic blood**  
43 534 **pressure among urban South African adolescents.** *Journal of biosocial science* 2012,  
44 535 **44(04)**:433-458.
- 45 536 31. Longo-Mbenza B, Luila EL, M'Buyamba-Kabangu J: **Nutritional status, socio-economic**  
46 537 **status, heart rate, and blood pressure in African school children and adolescents.**  
47 538 *International journal of cardiology* 2007, **121(2)**:171-177.
- 48 539 32. Aounallah-Skhiri H, El Ati J, Traissac P, Romdhane HB, Eymard-Duvernay S, Delpuech F,  
49 540 Achour N, Maire B: **Blood pressure and associated factors in a North African adolescent**  
50 541 **population. A national cross-sectional study in Tunisia.** *BMC Public Health* 2012,  
51 542 **12(1)**:1.
- 52  
53  
54  
55  
56  
57  
58  
59  
60

- 1  
2  
3 543 33. Afrifa-Anane E, Agyemang C, Codjoe SNA, Ogedegbe G, Aikins Ad-G: **The association of physical activity, body mass index and the blood pressure levels among urban poor youth in Accra, Ghana.** *BMC public health* 2015, **15**(1):269.
- 4 544  
5 545  
6 546 34. Anane AE, Agyemang C, Codjoe SNA, Ogedegbe G, Aikins A: **The association of physical activity, Body mass index and blood pressure among urban poor youth in Accra, Ghana.** *BMC Public Health* 2015, **15**.
- 7 547  
8 548  
9 549 35. Hu G, Barengo NC, Tuomilehto J, Lakka TA, Nissinen A, Jousilahti P: **Relationship of physical activity and body mass index to the risk of hypertension: a prospective study in Finland.** *Hypertension* 2004, **43**(1):25-30.
- 10 550  
11 551  
12 552 36. Juraschek SP, Blaha MJ, Whelton SP, Blumenthal R, Jones SR, Keteyian SJ, Schairer J, Brawner CA, Al-Mallah MH: **Physical fitness and hypertension in a population at risk for cardiovascular disease: the Henry Ford Exercise Testing (FIT) Project.** *Journal of the American Heart Association* 2014, **3**(6):e001268.
- 13 553  
14 554  
15 555  
16 556 37. Väistö J, Eloranta A-M, Viitasalo A, Tompuri T, Lintu N, Karjalainen P, Lampinen E-K, Ågren J, Laaksonen DE, Lakka H-M: **Physical activity and sedentary behaviour in relation to cardiometabolic risk in children: cross-sectional findings from the Physical Activity and Nutrition in Children (PANIC) Study.** *International Journal of Behavioral Nutrition and Physical Activity* 2014, **11**(1):55.
- 17 557  
18 558  
19 559  
20 560  
21 561 38. Munthali RJ, Kagura J, Lombard Z, Norris SA: **Childhood adiposity trajectories are associated with late adolescent blood pressure: birth to twenty cohort.** *BMC Public Health* 2016, **16**(1):1-10.
- 22 562  
23 563  
24 564 39. **STATSSA: Mortality and causes of death in South Africa, 2015: Findings from death notification.** In. Pretoria: Statistics South Africa; 2017 1-140. .
- 25 565  
26 566 40. Peer N, Steyn K, Lombard C, Gwebushe N, Levitt N: **A high burden of hypertension in the urban black population of Cape Town: The Cardiovascular Risk in Black South Africans (CRIBSA) Study.** *PLoS One* 2013, **8**(11):e78567.
- 27 567  
28 568  
29 569 41. Pisa P, Behanan R, Vorster H, Kruger A: **Social drift of cardiovascular disease risk factors in Africans from the North West Province of South Africa: the PURE study: cardiovascular topics.** *Cardiovascular journal of Africa* 2012, **23**(7):371-388.
- 30 570  
31 571  
32 572 42. Steyn K, Fourie J, Lombard C, Katzenellenbogen J, Bourne L, Jooste P: **Hypertension in the black community of the Cape Peninsula, South Africa.** *East African medical journal* 1996, **73**(11):758-763.
- 33 573  
34 574  
35 575 43. Tibazarwa K, Ntyintyane L, Sliwa K, Gerntholtz T, Carrington M, Wilkinson D, Stewart S: **A time bomb of cardiovascular risk factors in South Africa: results from the Heart of Soweto Study "Heart Awareness Days".** *International journal of cardiology* 2009, **132**(2):233-239.
- 36 576  
37 577  
38 578  
39 579 44. Kahn K, Collinson MA, Gómez-Olivé FX, Mokoena O, Twine R, Mee P, Afolabi SA, Clark BD, Kabudula CW, Khosa A: **Profile: Agincourt health and socio-demographic surveillance system.** *International journal of epidemiology* 2012, **41**(4):988-1001.
- 40 580  
41 581  
42 582 45. Pradeilles R, Rousham EK, Norris SA, Griffiths PL: **Urban South African adolescents' perceptions of their neighborhood socio-economic environments: the Birth to Twenty plus cohort study.** *Children Youth and Environments* 2014, **24**(3):173-200.
- 43 583  
44 584  
45 585 46. Richter L, Norris S, Pettifor J, Yach D, Cameron N: **Cohort profile: Mandela's children: the 1990 Birth to Twenty study in South Africa.** *International journal of epidemiology* 2007, **36**(3):504-511.
- 46 586  
47 587  
48 588 47. Chobanian AV: **Joint National Committee on Prevention, Detection, Evaluation, and Treatment of High Blood Pressure. National Heart, Lung, and Blood Institute; National High Blood Pressure Education Program Coordinating Committee: Seventh report of the Joint National Committee on Prevention, Detection, Evaluation, and Treatment of High Blood Pressure.** *Hypertension* 2003, **42**:1206-1252.
- 49 589  
50 590  
51 591  
52 592  
53 593  
54 594  
55 595  
56 596  
57  
58  
59  
60



- 1  
2  
3 593 48. Strandberg TE, Pitkala K: **What is the most important component of blood pressure: systolic, diastolic or pulse pressure?** *Current opinion in nephrology and hypertension* 2003, **12**(3):293-297.
- 4 594  
5 595  
6 596 49. Cameron N: **The measurement of human growth:** Taylor & Francis; 1984.
- 7 597 50. Lohman TG, Roche AF, Martorell R: **Anthropometric standardization reference manual:** Human kinetics books; 1988.
- 8 598  
9 599 51. Houweling TA, Kunst AE, Mackenbach JP: **Measuring health inequality among children in developing countries: does the choice of the indicator of economic status matter?** *International journal for equity in health* 2003, **2**(1):8.
- 10 600  
11 601  
12 602 52. Feeley AB, Musenge E, Pettifor JM, Norris SA: **Investigation into longitudinal dietary behaviours and household socio-economic indicators and their association with BMI Z-score and fat mass in South African adolescents: the Birth to Twenty (Bt20) cohort.** *Public health nutrition* 2013, **16**(04):693-703.
- 13 603  
14 604  
15 605 53. Jones LL, Griffiths PL, Adair LS, Norris SA, Richter LM, Cameron N: **A comparison of the socio-economic determinants of growth retardation in South African and Filipino infants.** *Public health nutrition* 2008, **11**(12):1220-1228.
- 16 606  
17 607  
18 608 54. Bull FC, Maslin TS, Armstrong T: **Global physical activity questionnaire (GPAQ): nine country reliability and validity study.** *Journal of Physical Activity and health* 2009, **6**(6):790-804.
- 19 609  
20 610  
21 611 55. VanderWeele TJ: **Mediation analysis: a practitioner's guide.** *Annual review of public health* 2016, **37**:17-32.
- 22 612  
23 613  
24 614 56. Hu Lt, Bentler PM: **Cutoff criteria for fit indexes in covariance structure analysis: Conventional criteria versus new alternatives.** *Structural equation modeling: a multidisciplinary journal* 1999, **6**(1):1-55.
- 25 615  
26 616  
27 617 57. Schermelleh-Engel K, Moosbrugger H, Müller H: **Evaluating the fit of structural equation models: Tests of significance and descriptive goodness-of-fit measures.** *Methods of psychological research online* 2003, **8**(2):23-74.
- 28 618  
29 619  
30 620 58. Vandenberg RJ: **Introduction: Statistical and Methodological Myths and Urban Legends: Where, Pray Tell, Did They Get This Idea?** In.: Sage Publications Sage CA: Thousand Oaks, CA; 2006.
- 31 621  
32 622  
33 623 59. Fan X, Sivo SA: **Sensitivity of fit indexes to misspecified structural or measurement model components: Rationale of two-index strategy revisited.** *Structural Equation Modeling* 2005, **12**(3):343-367.
- 34 624  
35 625  
36 626 60. Alwin DF, Hauser RM: **The decomposition of effects in path analysis.** *American sociological review* 1975:37-47.
- 37 627  
38 628 61. Williams R, Allison PD, Moral-Benito E: **Xtdpdml: Linear dynamic panel-data estimation using maximum likelihood and structural equation modeling.** In.; 2016.
- 39 629  
40 630 62. Kerry SM, Emmett L, Micah FB, Martin-Peprah R, Antwi S, Phillips RO, Plange-Rhule J, Eastwood JB, Cappuccio FP: **Rural and semi-urban differences in salt intake, and its dietary sources, in Ashanti, West Africa.** *Ethnicity & disease* 2005, **15**(1):33-39.
- 41 631  
42 632  
43 633 63. Lissack CNA, Sobngwi E, Ngassam E, Ngoa LSE: **Rural and urban differences in metabolic profiles in a Cameroonian population.** *Pan African Medical Journal* 2011, **10**.
- 44 634  
45 635 64. Stringhini S, Forrester TE, Plange-Rhule J, Lambert EV, Viswanathan B, Riesen W, Korte W, Levitt N, Tong L, Dugas LR: **The social patterning of risk factors for noncommunicable diseases in five countries: evidence from the modeling the epidemiologic transition study (METS).** *BMC Public Health* 2016, **16**(1):956.
- 46 636  
47 637  
48 638 65. de Hoog ML, van Eijnsden M, Stronks K, Gemke RJ, Vrijkotte TG: **Association between body size and blood pressure in children from different ethnic origins.** *Cardiovascular diabetology* 2012, **11**(1):136.
- 49 639  
50 640  
51 641  
52  
53  
54  
55  
56  
57  
58  
59  
60

- 1  
2  
3 642 66. Dinsa G, Goryakin Y, Fumagalli E, Suhrcke M: **Obesity and socioeconomic status in**  
4 643 **developing countries: a systematic review.** *Obesity reviews* 2012, **13**(11):1067-1079.  
5 644 67. Masala G, Bendinelli B, Versari D, Saieva C, Ceroti M, Santagiuliana F, Caini S, Salvini S, Sera  
6 645 F, Taddei S: **Anthropometric and dietary determinants of blood pressure in over 7000**  
7 646 **Mediterranean women: the European Prospective Investigation into Cancer and**  
8 647 **Nutrition-Florence cohort.** *Journal of hypertension* 2008, **26**(11):2112-2120.  
9 648 68. Wilson BL, Albright GL, Steiner SS, Andreassi JL: **Cardiodynamic response to**  
10 649 **psychological and cold pressor stress: further evidence for stimulus response**  
11 650 **specificity and directional fractionation.** *Biofeedback and Self-regulation* 1991, **16**(1):45-  
12 651 53.  
13 652 69. Goon D, Amusa L, Mhlongo D, Khoza L, Any-Anwu F: **Elevated blood pressure among**  
14 653 **rural South African children in Thohoyandou, South Africa.** *Iranian journal of public*  
15 654 *health* 2013, **42**(5):489.  
16 655 70. Moselakgomo VK, Toriola AL, Shaw BS, Goon DT, Akinyemi O: **Body mass index,**  
17 656 **overweight, and blood pressure among adolescent schoolchildren in Limpopo**  
18 657 **province, South Africa.** *Revista Paulista de Pediatria* 2012, **30**(4):562-569.  
19 658 71. Lynch JW, Smith GD, Kaplan GA, House JS: **Income inequality and mortality: importance**  
20 659 **to health of individual income, psychosocial environment, or material conditions.**  
21 660 *BMJ: British Medical Journal* 2000, **320**(7243):1200.  
22 661 72. Ploubidis GB, Mathenge W, De Stavola B, Grundy E, Foster A, Kuper H: **Socioeconomic**  
23 662 **position and later life prevalence of hypertension, diabetes and visual impairment in**  
24 663 **Nakuru, Kenya.** *International journal of public health* 2013, **58**(1):133-141.  
25 664 73. Drewnowski A: **The cost of US foods as related to their nutritive value.** *The American*  
26 665 *journal of clinical nutrition* 2010, **92**(5):1181-1188.  
27 666 74. Popkin BM: **The nutrition transition and obesity in the developing world.** *The Journal of*  
28 667 *nutrition* 2001, **131**(3):871S-873S.  
29 668 75. Sawaya AL, Sesso R, Florencio TM, Fernandes MT, Martins PA: **Association between**  
30 669 **chronic undernutrition and hypertension.** *Maternal & child nutrition* 2005, **1**(3):155-  
31 670 163.  
32  
33  
34  
35 671  
36  
37 672  
38  
39 673  
40  
41 674  
42  
43 675  
44  
45 676  
46  
47 677  
48  
49  
50  
51  
52  
53  
54  
55  
56  
57  
58  
59  
60

**Table 2:** Descriptive characteristics

|                                              | Total          | n   | Urban         | n   | Rural          | p value |
|----------------------------------------------|----------------|-----|---------------|-----|----------------|---------|
| Age (years)                                  | 22.04 (1.24)   | 492 | 22.77 (0.49)  | 476 | 21.28 (1.31)   | 0.001   |
| Weight (kg)                                  | 64.62 (14.82)  | 492 | 64.67 (15.6)  | 473 | 64.55 (14.03)  | 0.90    |
| Height (m)                                   | 1.61 (0.007)   | 492 | 1.60 (0.07)   | 475 | 1.61 (0.07)    | 0.001   |
| BMI (kg/m <sup>2</sup> )                     | 25.05 (5.59)   | 492 | 25.32 (5.91)  | 476 | 24.78 (5.24)   | 0.13    |
| BMI classification (%)                       |                | 492 |               | 476 |                | 0.015   |
| Underweight (<18.4 kg/m <sup>2</sup> )       | 5.98           |     | 7.10          |     | 4.82           |         |
| Normal weight (18.5-24.9 kg/m <sup>2</sup> ) | 51.34          |     | 46.45         |     | 56.39          |         |
| Overweight (25-29.9 kg/m <sup>2</sup> )      | 26.19          |     | 29.21         |     | 23.06          |         |
| Obese (≥30 kg/m <sup>2</sup> )               | 16.49          |     | 17.24         |     | 15.72          |         |
| Waist circumference (cm)                     | 80.60 (12.08)  | 492 | 80.18 (12.63) | 476 | 81.03 (11.47)  | 0.26    |
| Central obesity, WC ≥ 80 cm , %              | 43.81          | 492 | 45.70         | 476 | 44.74          | 0.55    |
| Household SES index (sum of assets)          | 7.24 (2.70)    | 492 | 8.83 (2.37)   | 476 | 5.59 (1.91)    | <0.001  |
| Total MVPA (min/week)*                       | 870(280-1810)  | 492 | 420(160-900)  | 385 | 1680(970-2580) | <0.001  |
| Sitting time (mins/day)*                     | 300 (240-480)  | 492 | 360 (240-480) | 385 | 300 (180-360)  | <0.001  |
| Systolic blood pressure                      | 106.68 (11.64) | 492 | 110.30 (11.4) | 471 | 102.89 (10.7)  | <0.001  |
| Diastolic blood pressure                     | 70.23 (9.00)   | 492 | 72.78 (8.3)   | 471 | 67.57 (9.0)    | <0.001  |
| BP classification (%)                        |                | 492 |               | 471 |                | <0.001  |
| Low BP                                       | 12.46          |     | 5.49          |     | 19.75          |         |
| Normal BP                                    | 69.16          |     | 67.48         |     | 70.91          |         |
| Prehypertension                              | 16.20          |     | 23.58         |     | 8.49           |         |
| Hypertensive                                 | 2.18           |     | 3.46          |     | 0.85           |         |
| Elevated BP (%)                              | 18.38          |     | 27.04         |     | 9.34           | <0.001  |
| Highest Education attained (%)               |                | 480 |               | 371 |                | <0.001  |
| Primary school                               | 1.18           |     | 0             |     | 2.70           |         |
| Secondary school                             | 60.75          |     | 48.33         |     | 76.81          |         |
| Tertiary education                           | 38.07          |     | 51.67         |     | 20.49          |         |

Data presented as mean (SD) otherwise stated; \* Median (IQR)

**Table 3a:** Structural equation model for SES, MVPA and BMI on SBP in urban women

| Effect of:<br>N=489 | Outcome: | Direct effects(95% CI)   | Indirect effects( 95% CI) | Total effects(95% CI)     | Proportion of total effect mediated |
|---------------------|----------|--------------------------|---------------------------|---------------------------|-------------------------------------|
| Household assets    | SBP      | -0.34 (-0.75; 0.07)      |                           | -0.29 (-0.70; 0.12)       | 0.13 <sup>a</sup>                   |
|                     | via BMI  |                          | 0.05 (-0.05; 0.14)        |                           |                                     |
|                     | BMI      | 0.13 (-0.09; 0.35)       |                           | 0.11 (-0.11; 0.33)        | 0.1 <sup>a</sup>                    |
|                     | via MVPA |                          | -0.014 (-0.05; 0.013)     |                           |                                     |
|                     | MVPA     | -41.71 (-73.48; -9.94)** |                           | -41.71 (-73.48; -9.94)**  |                                     |
| MVPA                | SBP      | -0.0002 (-0.001; 0.001)  |                           | -0.0000 (-0.0012; 0.0011) | 0.3 <sup>a</sup>                    |
|                     | via BMI  |                          | 0.0001 (-0.0001; 0.0004)  |                           |                                     |
| BMI                 | SBP      | 0.37 (0.21; 0.53)***     |                           | 0.37 (0.21; 0.53)***      |                                     |

Adjusted for age; \* P<0.05; \*\* P< 0.01; \*\*\*P< 0.001; SBP; systolic blood pressure, MVPA; moderate to vigorous intensity physical activity, BMI; body mass index, SES; social economic status, <sup>a</sup> Assessed using the absolute values for both indirect and direct effects

**Urban Fit Indices:** LR test of model vs. saturated:  $\chi^2(4) = 0.97$ , Prob >  $\chi^2 = 0.91$ ; RMSEA = 0.00; **CFI= 1.00** Comparative fit index;

TLI= 1.12 Tucker-Lewis index; **SRMR=0.011**: Standardized root mean squared residual, CD= 0.017 Coefficient of determination.

**Table 3b:** Structural equation model for SES, MVPA and BMI on SBP in rural women

| Effect of:<br>N= 378    | Outcome:        | Direct effects(95% CI)   | Indirect effects( 95% CI) | Total effects(95% CI)    | Proportion of total effect mediated |
|-------------------------|-----------------|--------------------------|---------------------------|--------------------------|-------------------------------------|
| <b>Household assets</b> | SBP<br>via BMI  | -0.65 (-1.19; -0.096)*   | 0.08 (-0.04; 0.19)        | -0.56 (-1.12; -0.02)*    | 0.11 <sup>a</sup>                   |
|                         | BMI<br>via MVPA | 0.27 (0.01; 0.53)*       | -0.01 (-0.04; 0.01)       | 0.26 (-0.005; 0.53)*     | 0.04                                |
|                         | MVPA            | -29.51 (-87.81; 28.78)   |                           | -29.51 (-87.81; 28.78)   |                                     |
| <b>MVPA</b>             | SBP<br>via BMI  | 0.0004 (-.0005729 .0013) | 0.0001 (-0.0000; 0.0003)  | 0.0005 (-0.0005; 0.0015) | 0.2                                 |
| <b>BMI</b>              | SBP             | 0.33 (0.12; 0.54)**      |                           | 0.33 (0.12; 0.54)**      |                                     |

Adjusted for age; \* P<0.05; \*\* P< 0.01; \*\*\*P< 0.001; SBP; systolic blood pressure, MVPA; moderate to vigorous physical activity, BMI; body mass index, SES; social economic status, <sup>a</sup> Assessed using the absolute values for both indirect and direct effects

**Rural Fit Indices:** LR test of model vs. saturated: chi2(4) = 10.51, Prob > chi2 = 0.03; RMSEA = 0.066; **CFI= 0.72** Comparative fit index; TLI= 0.37 Tucker-Lewis index; **SRMR= 0.04** : Standardized root mean squared residual, CD= 0.03 Coefficient of determination.

**Table 3c:** Structural equation model for SES, MVPA and BMI on SBP in the pooled sample of urban and rural women

| Effect of:<br>N=867     | Outcome: | Direct effects(95% CI)        | Indirect effects( 95% CI) | Total effects(95% CI)         | Proportion of total effect mediated |
|-------------------------|----------|-------------------------------|---------------------------|-------------------------------|-------------------------------------|
| <b>Household assets</b> | SBP      | 0.23 (-0.08; 0.54)            |                           | 0.46 (0.15; 0.76)**           | 0.5                                 |
|                         | via BMI  |                               | 0.23 (0.10; 0.35)***      |                               |                                     |
|                         | BMI      | 0.20 (0.05; 0.34)**           |                           | 0.15 (0.01; 0.29)*            | 0.25 <sup>a</sup>                   |
|                         | via MVPA |                               | -0.05 (-.100; 0.003)      |                               |                                     |
|                         | MVPA     | -144.83 (-170.55; -119.12)*** |                           | -144.83 (-170.55; -119.12)*** |                                     |
| <b>MVPA</b>             | SBP      | -0.001 (-0.002; -0.0005)**    |                           | -0.001 (-0.002; -0.0003)**    | 0.1 <sup>a</sup>                    |
|                         | via BMI  |                               | 0.0001 (-0.0000; 0.0002)  |                               |                                     |
| <b>BMI</b>              | SBP      | 0.35 (0.21; 0.49)***          |                           | 0.35 (0.21; 0.49)***          |                                     |

Adjusted for age; \* P<0.05; \*\* P< 0.01; \*\*\*P< 0.001; SBP; systolic blood pressure, MVPA; moderate to vigorous intensity physical activity, BMI; body mass index, SES; social economic status, <sup>a</sup> Assessed using the absolute values for both indirect and direct effects

**Pooled Fit Indices:** LR test of model vs. saturated:  $\chi^2(4) = 24.829$ , Prob >  $\chi^2 = 0.000$ ; RMSEA = 0.077; **CFI= 0.89** Comparative fit index; TLI= 0.75 Tucker-Lewis index; **SRMR=0.033**: Standardized root mean squared residual, CD=0.137 Coefficient of determination.

**Figure legends**

Figure 1: Selection of study participants in rural and urban

Figure 2: Structural equation model for SES, MVPA and BMI on SBP in urban

Figure 3: Structural equation model for SES, MVPA and BMI on SBP in rural

Figure 4: Structural equation model for SES, MVPA and BMI on SBP pooled

For peer review only

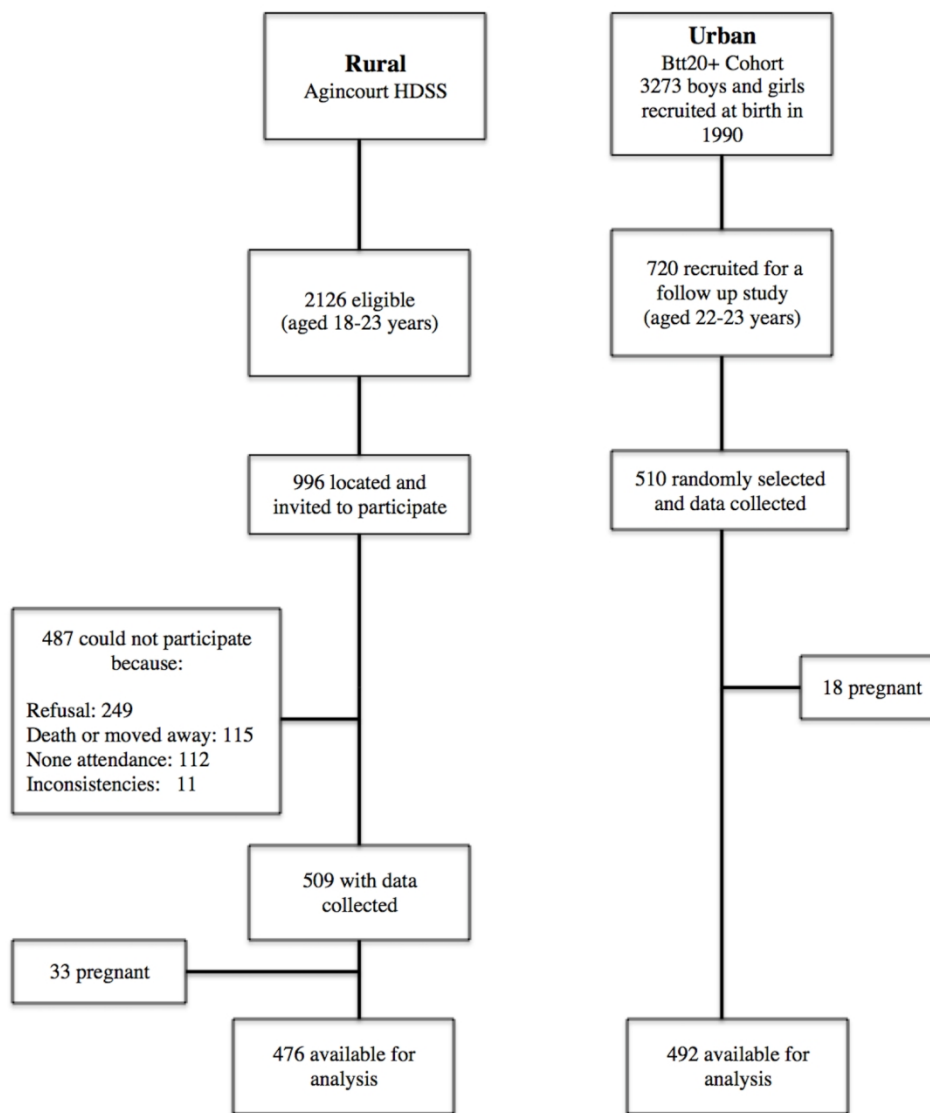

Figure 1: Selection of study participants in rural and urban

144x167mm (300 x 300 DPI)



1  
2  
3  
4  
5  
6  
7  
8  
9  
10  
11  
12  
13  
14  
15  
16  
17  
18  
19  
20  
21  
22  
23  
24  
25  
26  
27  
28  
29  
30  
31  
32  
33  
34  
35  
36  
37  
38  
39  
40  
41  
42  
43  
44  
45  
46  
47  
48  
49  
50  
51  
52  
53  
54  
55  
56  
57  
58  
59  
60

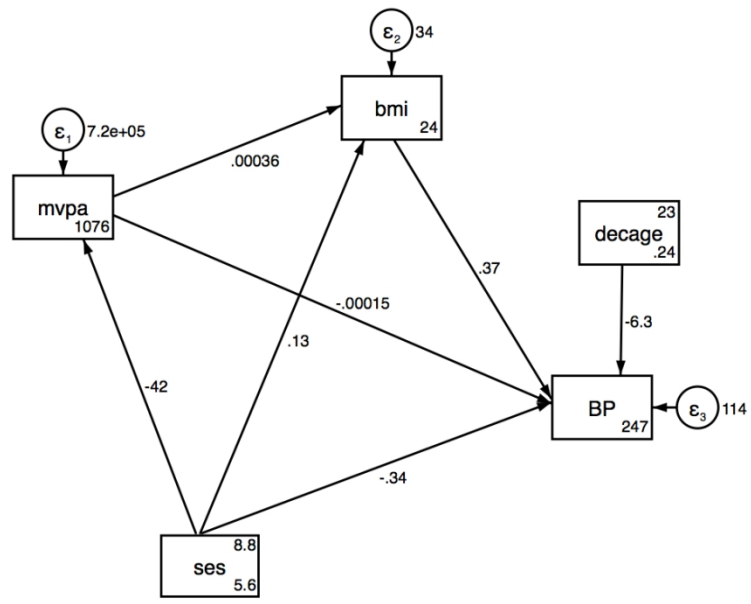

Figure 2: Structural equation model for SES, MVPA and BMI on SBP in urban  
106x70mm (300 x 300 DPI)

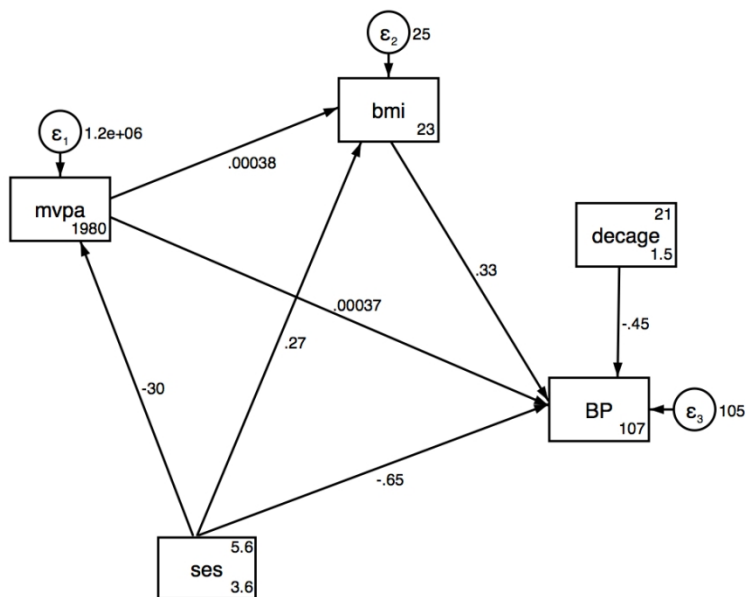

Figure 3: Structural equation model for SES, MVPA and BMI on SBP in rural  
106x70mm (300 x 300 DPI)

1  
2  
3  
4  
5  
6  
7  
8  
9  
10  
11  
12  
13  
14  
15  
16  
17  
18  
19  
20  
21  
22  
23  
24  
25  
26  
27  
28  
29  
30  
31  
32  
33  
34  
35  
36  
37  
38  
39  
40  
41  
42  
43  
44  
45  
46  
47  
48  
49  
50  
51  
52  
53  
54  
55  
56  
57  
58  
59  
60

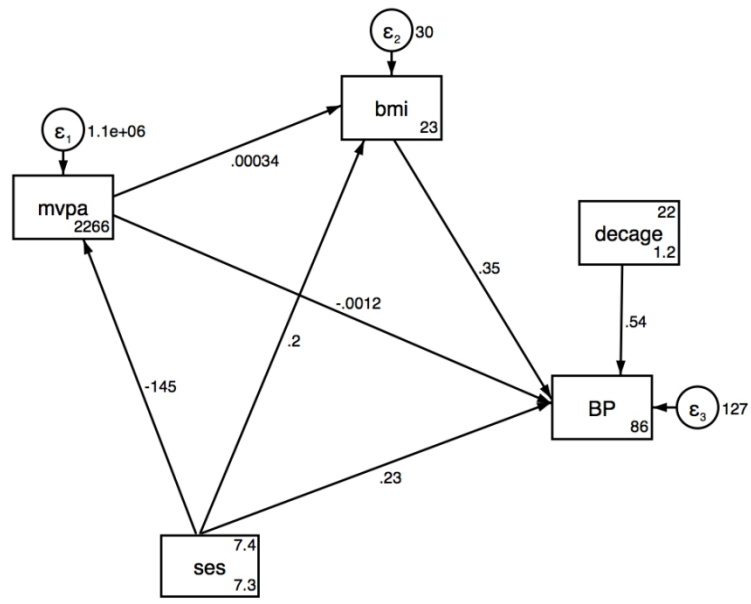

Figure 4: Structural equation model for SES, MVPA and BMI on SBP pooled  
106x70mm (300 x 300 DPI)

## STROBE Statement—checklist of items that should be included in reports of observational studies

|                           | Item No | Recommendation                                                                                                                                                                                                                                                                                                                                                                                                                                                                                                                                                                                                                                                                                                                                                                           |
|---------------------------|---------|------------------------------------------------------------------------------------------------------------------------------------------------------------------------------------------------------------------------------------------------------------------------------------------------------------------------------------------------------------------------------------------------------------------------------------------------------------------------------------------------------------------------------------------------------------------------------------------------------------------------------------------------------------------------------------------------------------------------------------------------------------------------------------------|
| <b>Title and abstract</b> | 1       | (a) Indicate the study's design with a commonly used term in the title or the abstract<br><b>MS Page 4 Par 2</b><br>(b) Provide in the abstract an informative and balanced summary of what was done and what was found <b>MS Page 4</b>                                                                                                                                                                                                                                                                                                                                                                                                                                                                                                                                                 |
| <b>Introduction</b>       |         |                                                                                                                                                                                                                                                                                                                                                                                                                                                                                                                                                                                                                                                                                                                                                                                          |
| Background/rationale      | 2       | Explain the scientific background and rationale for the investigation being reported<br><b>MS Pages 5-6</b>                                                                                                                                                                                                                                                                                                                                                                                                                                                                                                                                                                                                                                                                              |
| Objectives                | 3       | State specific objectives, including any prespecified hypotheses<br><b>MS Page 6 Par 2</b>                                                                                                                                                                                                                                                                                                                                                                                                                                                                                                                                                                                                                                                                                               |
| <b>Methods</b>            |         |                                                                                                                                                                                                                                                                                                                                                                                                                                                                                                                                                                                                                                                                                                                                                                                          |
| Study design              | 4       | Present key elements of study design early in the paper<br><b>Methods: MS Page 6 Par 3</b>                                                                                                                                                                                                                                                                                                                                                                                                                                                                                                                                                                                                                                                                                               |
| Setting                   | 5       | Describe the setting, locations, and relevant dates, including periods of recruitment, exposure, follow-up, and data collection<br><b>Methods: MS Page 6 Par 3</b>                                                                                                                                                                                                                                                                                                                                                                                                                                                                                                                                                                                                                       |
| Participants              | 6       | (a) <i>Cohort study</i> —Give the eligibility criteria, and the sources and methods of selection of participants. Describe methods of follow-up <b>N/A</b><br><br><i>Case-control study</i> —Give the eligibility criteria, and the sources and methods of case ascertainment and control selection. Give the rationale for the choice of cases and controls <b>N/A</b><br><br><i>Cross-sectional study</i> —Give the eligibility criteria, and the sources and methods of selection of participants <b>Methods: MS Page 6 Par 3</b><br>(b) <i>Cohort study</i> —For matched studies, give matching criteria and number of exposed and unexposed <b>N/A</b><br><br><i>Case-control study</i> —For matched studies, give matching criteria and the number of controls per case <b>N/A</b> |
| Variables                 | 7       | Clearly define all outcomes, exposures, predictors, potential confounders, and effect modifiers. Give diagnostic criteria, if applicable <b>Methods: MS Page 6 Par 4 – Page 8 Par 1</b>                                                                                                                                                                                                                                                                                                                                                                                                                                                                                                                                                                                                  |
| Data sources/measurement  | 8*      | For each variable of interest, give sources of data and details of methods of assessment (measurement). Describe comparability of assessment methods if there is more than one group <b>Methods: MS Page 6 Par 4 – Page 8 Par 1</b>                                                                                                                                                                                                                                                                                                                                                                                                                                                                                                                                                      |
| Bias                      | 9       | Describe any efforts to address potential sources of bias <b>Methods: MS Page 6 Par 3</b>                                                                                                                                                                                                                                                                                                                                                                                                                                                                                                                                                                                                                                                                                                |
| Study size                | 10      | Explain how the study size was arrived at <b>Methods: MS Page 6 Par 3</b>                                                                                                                                                                                                                                                                                                                                                                                                                                                                                                                                                                                                                                                                                                                |
| Quantitative variables    | 11      | Explain how quantitative variables were handled in the analyses. If applicable, describe which groupings were chosen and why <b>Methods: MS Page 8 Par 2</b>                                                                                                                                                                                                                                                                                                                                                                                                                                                                                                                                                                                                                             |
| Statistical methods       | 12      | (a) Describe all statistical methods, including those used to control for confounding<br><b>Statistical analyses: MS Page 8 Par 2 and 3</b><br>(b) Describe any methods used to examine subgroups and interactions <b>N/A</b><br>(c) Explain how missing data were addressed <b>Statistical analyses: MS Page 8 Par 2</b><br>(d) <i>Cohort study</i> —If applicable, explain how loss to follow-up was addressed<br><i>Case-control study</i> —If applicable, explain how matching of cases and controls was                                                                                                                                                                                                                                                                             |

1  
2  
3  
4  
5  
6  
7  
8  
9  
10  
11  
12  
13  
14  
15  
16  
17  
18  
19  
20  
21  
22  
23  
24  
25  
26  
27  
28  
29  
30  
31  
32  
33  
34  
35  
36  
37  
38  
39  
40  
41  
42  
43  
44  
45  
46  
47  
48  
49  
50  
51  
52  
53  
54  
55  
56  
57  
58  
59  
60

addressed **N/A**  
*Cross-sectional study*—If applicable, describe analytical methods taking account of  
sampling strategy **N/A**  

---

*(e)* Describe any sensitivity analyses **N/A**

Continued on next page

For peer review only

**Results**

|                  |     |                                                                                                                                                                                                                                                                                                                                                                                                                                                                  |
|------------------|-----|------------------------------------------------------------------------------------------------------------------------------------------------------------------------------------------------------------------------------------------------------------------------------------------------------------------------------------------------------------------------------------------------------------------------------------------------------------------|
| Participants     | 13* | (a) Report numbers of individuals at each stage of study—eg numbers potentially eligible, examined for eligibility, confirmed eligible, included in the study, completing follow-up, and analysed <b>Results: Page 8 Par 5 – Page 9 Par 1</b><br>(b) Give reasons for non-participation at each stage <b>N/A</b><br>(c) Consider use of a flow diagram <b>N/A</b>                                                                                                |
| Descriptive data | 14* | (a) Give characteristics of study participants (eg demographic, clinical, social) and information on exposures and potential confounders <b>Page 8 Par 5 – Page 9 Par 1</b><br>(b) Indicate number of participants with missing data for each variable of interest <b>Results: Page 8 Par 5</b><br>(c) <i>Cohort study</i> —Summarise follow-up time (eg, average and total amount) <b>N/A</b>                                                                   |
| Outcome data     | 15* | <i>Cohort study</i> —Report numbers of outcome events or summary measures over time <b>N/A</b><br><i>Case-control study</i> —Report numbers in each exposure category, or summary measures of exposure <b>N/A</b><br><i>Cross-sectional study</i> —Report numbers of outcome events or summary measures <b>Results: Page 8 Par 5</b>                                                                                                                             |
| Main results     | 16  | (a) Give unadjusted estimates and, if applicable, confounder-adjusted estimates and their precision (eg, 95% confidence interval). Make clear which confounders were adjusted for and why they were included <b>Results: Page 9 Par 1</b><br>(b) Report category boundaries when continuous variables were categorized <b>N/A</b><br>(c) If relevant, consider translating estimates of relative risk into absolute risk for a meaningful time period <b>N/A</b> |
| Other analyses   | 17  | Report other analyses done—eg analyses of subgroups and interactions, and sensitivity analyses <b>N/A</b>                                                                                                                                                                                                                                                                                                                                                        |

**Discussion**

|                  |    |                                                                                                                                                                                                                |
|------------------|----|----------------------------------------------------------------------------------------------------------------------------------------------------------------------------------------------------------------|
| Key results      | 18 | Summarise key results with reference to study objectives <b>Discussion: Page 9 Par 2</b>                                                                                                                       |
| Limitations      | 19 | Discuss limitations of the study, taking into account sources of potential bias or imprecision. Discuss both direction and magnitude of any potential bias <b>Discussion: Page 11 Par 4</b>                    |
| Interpretation   | 20 | Give a cautious overall interpretation of results considering objectives, limitations, multiplicity of analyses, results from similar studies, and other relevant evidence <b>Page 9 Par 3 – Page 11 Par 3</b> |
| Generalisability | 21 | Discuss the generalisability (external validity) of the study results <b>Discussion: Page 9 Par 3 – Page 11</b>                                                                                                |

**Other information**

|         |    |                                                                                                                                                                                             |
|---------|----|---------------------------------------------------------------------------------------------------------------------------------------------------------------------------------------------|
| Funding | 22 | Give the source of funding and the role of the funders for the present study and, if applicable, for the original study on which the present article is based <b>Funding: Page 12 Par 1</b> |
|---------|----|---------------------------------------------------------------------------------------------------------------------------------------------------------------------------------------------|

\*Give information separately for cases and controls in case-control studies and, if applicable, for exposed and unexposed groups in cohort and cross-sectional studies.

**Note:** An Explanation and Elaboration article discusses each checklist item and gives methodological background and published examples of transparent reporting. The STROBE checklist is best used in conjunction with this article (freely available on the Web sites of PLoS Medicine at <http://www.plosmedicine.org/>, Annals of Internal Medicine at <http://www.annals.org/>, and Epidemiology at <http://www.epidem.com/>). Information on the STROBE Initiative is available at [www.strobe-statement.org](http://www.strobe-statement.org).

# BMJ Open

## Body composition and physical activity as mediators in the relationship between socio-economic status and blood pressure in young South African women: A structural equation model analysis

|                                 |                                                                                                                                                                                                                                                                                                                                                                                                                                                                                                                                                                                                                                                                                                                                                                                                                                                                                                                                      |
|---------------------------------|--------------------------------------------------------------------------------------------------------------------------------------------------------------------------------------------------------------------------------------------------------------------------------------------------------------------------------------------------------------------------------------------------------------------------------------------------------------------------------------------------------------------------------------------------------------------------------------------------------------------------------------------------------------------------------------------------------------------------------------------------------------------------------------------------------------------------------------------------------------------------------------------------------------------------------------|
| Journal:                        | <i>BMJ Open</i>                                                                                                                                                                                                                                                                                                                                                                                                                                                                                                                                                                                                                                                                                                                                                                                                                                                                                                                      |
| Manuscript ID                   | bmjopen-2018-023404.R2                                                                                                                                                                                                                                                                                                                                                                                                                                                                                                                                                                                                                                                                                                                                                                                                                                                                                                               |
| Article Type:                   | Research                                                                                                                                                                                                                                                                                                                                                                                                                                                                                                                                                                                                                                                                                                                                                                                                                                                                                                                             |
| Date Submitted by the Author:   | 08-Nov-2018                                                                                                                                                                                                                                                                                                                                                                                                                                                                                                                                                                                                                                                                                                                                                                                                                                                                                                                          |
| Complete List of Authors:       | Munthali, Richard; University of the Witwatersrand, MRC/Wits Developmental Pathways for Health Research Unit<br>Manyema, Mercy; Wits University, Epidemiology and Biostatistics<br>Said-Mohamed, Rihlat; University of the Witwatersrand, MRC/Wits Developmental Pathways for Health<br>Kagura, Juliana; University of Witwatersrand, Paediatrics and Child health<br>Tollman, Stephen; University of the Witwatersrand,<br>Kahn, Kathleen; University of the Witwatersrand,<br>Gómez-Olivé, F. Xavier; University of the Witwatersrand, Medical Research Council/Wits Rural Health and Health Transitions Unit (Agincourt), School of Public Health, Faculty of Health Sciences<br>Micklesfield, Lisa; University of the Witwatersrand, MRC/Wits Developmental Pathways for Health Research Unit<br>Dunger, David; University of Cambridge, Paediatrics<br>Norris, Shane; University of Witwatersrand, Paediatrics and Child Health |
| <b>Primary Subject Heading</b>: | Epidemiology                                                                                                                                                                                                                                                                                                                                                                                                                                                                                                                                                                                                                                                                                                                                                                                                                                                                                                                         |
| Secondary Subject Heading:      | Public health, Epidemiology                                                                                                                                                                                                                                                                                                                                                                                                                                                                                                                                                                                                                                                                                                                                                                                                                                                                                                          |
| Keywords:                       | Hypertension < CARDIOLOGY, Obesity, Socioeconomic status, Physical activity, Structural equation model, Body mass index                                                                                                                                                                                                                                                                                                                                                                                                                                                                                                                                                                                                                                                                                                                                                                                                              |
|                                 |                                                                                                                                                                                                                                                                                                                                                                                                                                                                                                                                                                                                                                                                                                                                                                                                                                                                                                                                      |

SCHOLARONE™  
Manuscripts

1  
2  
3  
4 1  
5 2 **Body composition and physical activity as mediators in the relationship between socio-**  
6 3 **economic status and blood pressure in young South African women: A structural equation**  
7 4 **model analysis**  
8  
9

10 5  
11 6  
12  
13 7 Richard J Munthali<sup>1</sup>, Mercy Manyema<sup>1, 2</sup>, Rihlat Said-Mohamed<sup>1</sup>, Juliana Kagura<sup>1</sup>, Stephen  
14  
15 8 Tollman<sup>3,4,5</sup>, Kathleen Kahn<sup>3, 4,5</sup>, F. Xavier Gómez-Olivé<sup>3</sup>, Lisa K. Micklesfield<sup>1</sup>, David Dunger<sup>6,1</sup>,  
16  
17 9 Shane A. Norris<sup>1</sup>  
18  
19

20 10  
21  
22 11 **Affiliations:**

23 12 <sup>1</sup>MRC/WITS Developmental Pathways for Health Research Unit, Department of Paediatrics,  
24 13 School of Clinical Medicine, Faculty of Health Sciences, University of the Witwatersrand, 7 York  
25 14 Rd, Parktown 2193, Johannesburg, South Africa  
26  
27  
28

29 15 <sup>2</sup>DST-NRF Centre of Excellence in Human Development, University of the Witwatersrand,  
30 16 Johannesburg, South Africa  
31  
32

33 17 <sup>3</sup>MRC/Wits Rural Public Health and Health Transitions Research Unit, School of Public Health,  
34 18 Faculty of Health Sciences, University of the Witwatersrand, Johannesburg, South Africa  
35  
36  
37

38 20 <sup>4</sup>INDEPTH Network, Accra, Ghana  
39  
40

41 22 <sup>5</sup>Umeå Centre for Global Health Research, Sweden.  
42  
43

44 24 <sup>6</sup>Department of Paediatrics, MRC Wellcome Trust-MRC Institute of Metabolic Science, NIHR  
45 25 Cambridge Comprehensive Biomedical Research Centre, University of Cambridge, Box 116,  
46 26 Addenbrooke's Hospital, Hills Road, Cambridge CB2 0QQ, UK  
47  
48  
49

50 27  
51 28  
52  
53 29 **Conflict of interest:** The views expressed in the submitted article are our own and not an  
54 30 official position of the affiliated institutions or funder. Authors have no financial relationships  
55 31 relevant to this article to disclose.  
56  
57  
58  
59  
60



1  
2  
3 32  
4  
56 33 **Corresponding Author:** Dr. Richard J. Munthali8  
9 34 MRC/Wits Developmental Pathways for Health Research Unit10  
11 35 University of the Witwatersrand12  
13  
14 36 Johannesburg15  
16  
17 37 Tel: +2711933112218  
19  
20 38 Email: munthali@aims.ac.za21  
22 39

23 40

24 41

25 42

26 43 **Authors' emails:**

27 44

28 45 Richard Junganiko Munthali: munthali@aims.ac.za

29 46 Mercy Manyema: mercy.manyema@gmail.com

30 47 Rihlat Said-Mohamed: rihlat.saidmohamed@wits.ac.za

31 48 Juliana Kagura: julianakagura@gmail.com

32 49 Stephen Tollman: stephen.tollman@wits.ac.za

33 50 Kathleen Kahn: kathleen.kahn@wits.ac.za

34 51 F. Xavier Gómez-Olivé: F.Gomez-OliveCasas@wits.ac.za

35 52 Lisa K. Micklesfield: lisa.micklesfield@wits.ac.za

36 53 David Dunger: dbd25@cam.ac.uk

37 54 Shane A Norris: shane.norris@wits.ac.za

38 55

39 56  
40  
41  
42  
43  
44  
45  
46  
47  
48  
49  
50  
51  
52  
53  
54  
55  
56  
57  
58  
59  
60

1  
2  
3 57  
4  
5 58  
6  
7 59  
8  
9 60  
10  
11 61  
12  
13 62  
14  
15 63  
16  
17 64  
18 65  
19 66  
20  
21 67  
22 68  
23  
24 69  
25 70  
26 71  
27  
28 72  
29 73  
30  
31 74  
32 75  
33 76  
34  
35 77  
36 78  
37  
38 79  
39 80  
40  
41 81  
42 82  
43 83  
44 84  
45 85  
46  
47 86  
48  
49 87  
50 88  
51  
52 89  
53 90  
54 91  
55  
56  
57  
58  
59  
60

**Abstract**

For peer review only

1  
2  
3 92 **Objectives** Varying hypertension prevalence across different socio-economic strata within a  
4  
5 93 population has been well reported. However the causal factors and pathways across different  
6  
7 94 settings are less clear, especially in sub-Saharan Africa. Therefore, this study aimed to  
8  
9 95 compare blood pressure (BP) levels, and investigate the extent to which socioeconomic status  
10  
11 96 (SES) is associated with blood pressure, in rural and urban South Africa women.  
12  
13

14 97

15  
16 98 **Setting** Rural and urban South Africa.  
17  
18 99

19  
20 100 **Design** Cross-sectional.  
21  
22 101

23  
24 102 **Participants** Cross-sectional data on SES, total moderate-vigorous physical activity (MVPA),  
25  
26 103 anthropometric and blood pressure were collected on rural (n=509) and urban (n=510) young  
27  
28 104 black women (18-23 years age). Pregnant and mentally or physically disabled women were  
29  
30 105 excluded from the study.  
31  
32 106

33  
34 107 **Results** The prevalence of combined overweight and obesity (46.5% versus 38.8%) and  
35  
36 108 elevated BP (27.0% versus 9.3%) were higher in urban than rural women respectively. Results  
37  
38 109 from the structural equation modelling showed significant direct positive effects of body mass  
39  
40 110 index (BMI) on systolic BP (SBP) in rural, urban and pooled datasets. Negative direct effects of  
41  
42 111 SES on SBP and positive total effects of SES on SBP were observed in the rural and pooled  
43  
44 112 datasets respectively. In rural young women, SES had direct positive effects on BMI and was  
45  
46 113 negatively associated with MVPA in urban and pooled analyses. BMI mediated the positive total  
47  
48 114 effects association between SES and SBP in pooled analyses ( $\beta$ ; 95%CI, 0.46; 0.15 to 0.76).  
49  
50 115

51  
52 116 **Conclusions** Though South Africa is undergoing nutritional and epidemiological transitions; the  
53  
54 117 prevalence of elevated BP still varies between rural and urban young women. The association  
55  
56  
57  
58  
59  
60

1  
2  
3 118 between SES and SBP varies considerably in economically diverse populations with BMI being  
4  
5 119 the most significant mediator. There is a need to tailor prevention strategies to take into  
6  
7 120 account optimizing BMI when designing strategies to reduce future risk of hypertension in  
8  
9 121 young women.  
10

11  
12 122

13  
14 123 **Keywords** Blood pressure, Body mass index, Hypertension, Obesity, Urban, Rural,  
15  
16 124 Socioeconomic status, Structural equation model, Physical activity  
17

18 125

19  
20 126

21  
22 127

23  
24 128

25 129

26 130

27 131

28 132

29 133

30 134

31 135

32 136

33  
34 137  
35  
36  
37  
38  
39  
40  
41  
42  
43  
44  
45  
46  
47  
48  
49  
50  
51  
52  
53  
54  
55  
56  
57  
58  
59  
60

1  
2  
3 138  
4  
5**Strengths**

1. The use of structural equation modelling allowed us to explore direct and indirect (mediation) effects of social economic status, physical activity and body mass index on elevated blood pressure from a representative sample of rural and urban populations of South African young women.
2. Although the urban and rural cohorts were from two different studies, the same research unit conducted both studies and, therefore, the data collection and management process were consistent between the two sites, thereby allowing for accurate comparison.

**Limitations**

1. Other unmeasured data, such as undernutrition in infancy, and dietary patterns were not included in the current analyses.
2. The low reliability of self-report data on physical activity could introduce bias. Thus, there is need for more accurate, objective measures of physical activity

31 139  
32  
33 140  
34  
35 141  
36  
37 142  
38  
39 143  
40  
41 144  
42  
43 145  
44  
45 146  
46  
47 147  
48  
49 148  
50  
51 149  
52  
53 150  
54  
55  
56  
57  
58  
59  
60

151

152

153

154

155 **Introduction**

156

157 High blood pressure (BP) or hypertension is a leading risk factor accounting for 7% of global  
158 disability-adjusted life years (DALYs) and contributing to the 34.5 million non-communicable  
159 disease (NCD) related deaths in 2010 [1, 2]. A recent global meta-analysis, involving 19.1  
160 million individuals, reported that on average there has been a decrease in BP globally, but low-  
161 to middle-income countries (LMICs) have seen an increase in hypertension [3]. The prevalence  
162 of high BP in LMICs is estimated at 30% [4, 5] and it is the most significant risk factor for  
163 cardiovascular disease, most notably stroke [6]. In 2000, hypertension was estimated to have  
164 caused 9% of all deaths and over 390 000 DALYs in South Africa. Further, hypertension  
165 contributed to 50% of all strokes and 42% of ischaemic heart disease (IHD), signifying a  
166 substantial public health burden [7]. A systematic review of sub-Saharan African (SSA) data  
167 shows prevalence rates of hypertension of up to 41% with higher prevalence rates noted in  
168 urban compared to rural populations [8, 9]. A study in men and women aged 40 to 60 years of  
169 age in six sites across four SSA countries, including South Africa, showed the same trend with  
170 South African urban and rural cohorts having the highest prevalence of hypertension (41.6 to  
171 54.1%) [10].

172

173 LMICs are experiencing both epidemiological and nutritional transitions with urban populations  
174 further along the transition as demonstrated by the higher prevalence of obesity and NCDs [4,  
175 5, 8, 10-15]. Some evidence has shown that there are differences in the levels of BP between  
176 rural and urban settings [8], while other studies have found no significant differences [16].

1  
2  
3 177 According to Glass and McAtee, internal biological systems are sculpted by an interaction  
4  
5 178 between genes and prolonged exposure to particular external environments, a principle they call  
6  
7 179 embodiment [17]. Thus the differences in built and social environments between rural and urban  
8  
9 180 settings may explain the differences in disease prevalence. A Ghanaian study showed that  
10  
11 181 both systolic blood pressure (SBP) and diastolic blood pressure (DBP) were significantly lower  
12  
13 182 in rural participants compared to urban participants [18]. However, a similar study in  
14  
15 183 adolescents found that BP levels were only lower in rural boys, with no difference in the girls  
16  
17 184 [19]. Pediatric and adolescent hypertension have been reported to track into adulthood in a  
18  
19 185 South African urban population [20]. Results on elevated BP from studies in rural South African  
20  
21 186 children have reported prevalence rates varying from 1.0% to 25.4% [21-24]. The factors  
22  
23 187 explaining these differences have not been fully studied in LMICs.  
24  
25

26 188  
27  
28 189 Socioeconomic factors such as education, household income and household assets have been  
29  
30 190 associated with BP levels [25-27]. In a US cohort of young adults, a higher household income  
31  
32 191 remained associated with lower SBP even after controlling for all potential covariates including  
33  
34 192 age, sex and bio-behavioral factors [28]. Similarly, in a French sample of 30-79 year olds, SBP  
35  
36 193 independently increased and was inversely associated with both individual education and  
37  
38 194 residential neighborhood education [29]. Studies in African countries have also found varying  
39  
40 195 associations between socioeconomic status (SES) and BP patterns, with both positive and  
41  
42 196 negative associations reported [8, 30, 31]. Some studies have speculated that the association  
43  
44 197 between SES and body mass index (BMI), physical activity levels, diet, smoking, alcohol intake  
45  
46 198 and malnutrition may influence BP patterns [18, 28, 31, 32]. Physical activity has been  
47  
48 199 inversely associated with blood pressure and BMI directly associated with BP in more advanced  
49  
50 200 economies, but inconsistent associations have been reported in LMICs [25, 33-37].  
51  
52

53  
54 201  
55  
56  
57  
58  
59  
60

1  
2  
3 202 There is a need to examine BP and its determinants in young South African adults given the  
4  
5 203 high rates of overweight and obesity, and hypertension observed in this age group [20, 38].  
6  
7 204 Recent South African reports also indicate that the highest pregnancy rates occur in the age  
8  
9 205 range of 20-24 years, with 26.2% of births reported, followed closely by the 25-29 year age  
10  
11 206 group (25.7%) [39], and therefore targeting young adult women would also reduce adverse  
12  
13 207 health outcomes in their children. It is important to closely examine rural-urban differences in  
14  
15 208 hypertension due to differences in the epidemiology of obesity and SES divergence in the  
16  
17 209 South African context, in order to better suit interventions to the different settings [23, 26, 30,  
18  
19 210 40-43]. Therefore, this study aims to compare BP levels between rural and urban young adult  
20  
21 211 South African women, and to determine whether there is an association between SES and BP,  
22  
23 212 and whether it is mediated by physical activity and BMI.  
24  
25  
26  
27  
28

## 29 214 **Methods**

### 31 32 215 **Study sample and site**

33  
34  
35 216 The rural Agincourt site, 2016 potential female participants between the ages of 18 and 23  
36  
37 217 years were in the existing Agincourt Health and Socio-demographic Surveillance System  
38  
39 218 database [44]. Only 996 were located during the data collection period and were invited to  
40  
41 219 participate and of these, 509 female participants were recruited. The urban sample consisted  
42  
43 220 of 510 young women between the ages of 22 and 23 years who were randomly selected from  
44  
45 221 the sample of 720 females who were part of the Birth-to-Twenty plus (BT20+) Young Adult  
46  
47 222 Survey [45, 46]. Young women (n=51; 33 in rural and 18 in urban) who were pregnant at the  
48  
49 223 time of the study were excluded, see the study design flow chart in **Figure 1**. Measurements  
50  
51 224 and questionnaires were completed by trained research assistants and nurses, and were  
52  
53  
54 225 standardised between both sites, to eliminate biases. The study protocols were approved by the  
55  
56  
57  
58  
59



1  
2  
3 226 Human Research Ethics Committee of the University of the Witwatersrand (Clearance  
4  
5 227 certificates M120138 for the Ntshembo-Hope Cross Sectional Survey in Agincourt and M111182  
6  
7 228 for the BT20+ survey). Written consent to participate was provided by participants, and mentally  
8  
9 229 or physically disabled women were excluded from the study.

### 12 230 **Patient and Public Involvement**

15 231 No patients private or public were involved in this study, as it was a community  
16  
17 232 population based.

### 21 233 **Blood pressure**

23 234 Blood pressure (mm Hg) was the outcome variable and it was measured using an Omron 6  
24  
25 235 automated machine (Kyoto, Japan). A five minute seated rest was observed before taking the  
26  
27 236 BP measurements. Participants' seated BP was measured three times on the right side, with a  
28  
29 237 2-minute interval between each measurement. The mean for the second and third readings was  
30  
31 238 recorded for the current analysis. We had various cuff sizes and the appropriate size was used  
32  
33 239 to accommodate differences in arm circumference.

36 240 According to the Seventh Report of the Joint National Committee on Prevention, Detection,  
37  
38 241 Evaluation, and Treatment of High Blood Pressure [47], five categories of BP have been  
39  
40 242 established for adults 18 years of age and older as shown in Table 1. These cut-offs were  
41  
42 243 utilized in the current study. Prehypertension and hypertension were combined to create a new  
43  
44 244 variable called elevated BP.

46 245

49 246 **Table 1:** Blood pressure classification [47]

| <b>Classification</b>      | <b>Systolic</b>       |     | <b>Diastolic</b>      |
|----------------------------|-----------------------|-----|-----------------------|
|                            | <b>Blood Pressure</b> |     | <b>Blood Pressure</b> |
| Low                        | <90                   | or  | < 60                  |
| Normal                     | <120                  | and | <80                   |
| Prehypertension            | 120-139               | or  | 80-90                 |
| High: Stage 1 Hypertension | 140-159               | or  | 90-99                 |
| High: Stage 2 hypertension | ≥160                  | or  | ≥100                  |

247

248

249

250

251

252

253

254

255

256 SBP was used in structural equation models (SEM) as it is more relevant in adults, and a

257 good predictor of adverse health outcomes later in life [48], such as CVDs.

### 258 **Anthropometry**

259 At both sites, participants' height and weight were measured by trained research assistants

260 using standard techniques [49, 50] . Weight was measured in light clothing and barefoot to the

1  
2  
3 261 nearest 0.1 kg using a digital scale (Tanita model TBF-410; Arlington Heights; USA). Height  
4  
5 262 was measured barefoot to the nearest 0.1 cm using a stadiometer (Holtain, Crymych, UK).  
6  
7 263 Waist circumference was measured with a non-stretchable fibreglass tape at the level of the  
8  
9  
10 264 umbilicus. BMI was calculated as weight/height<sup>2</sup> (kg/m<sup>2</sup>).  
11  
12

### 13 265 **Socio-economic status (SES)**

14  
15  
16 266 Physical assets owned in the participants' household were used as a proxy for SES index [51].  
17  
18 267 It was generated by summing the number of assets owned in the household from the following:  
19  
20 268 television, car, washing machine, fridge, phone, radio, microwave, cell phone, DVD/Video, DSTV  
21  
22 269 (cable channel), computer, internet, medical aid. Previous studies in this population have  
23  
24 270 shown that the sum of physical assets (household assets) is closely related to the household  
25  
26 271 per capital expenditure and household income [51-53]. The household SES is regarded as a  
27  
28 272 good measure of accumulated household wealth so it is a more reflective wealth index than  
29  
30 273 income of a household's wealth over time.  
31  
32

### 33 274 **Physical activity**

34  
35  
36 275 The Global Physical Activity Questionnaire (GPAQ), developed for global physical activity  
37  
38 276 surveillance, was completed via interview to obtain self-reported physical activity [54]. Total  
39  
40 277 MVPA in minutes per week (mins/wk) was calculated by adding occupation, travel-related and  
41  
42 278 leisure time moderate and vigorous intensity physical activity. Sitting time (mins/wk) was used  
43  
44 279 as a proxy for sedentary time.  
45  
46  
47

### 48 280 **Statistical analyses**

49  
50  
51 281 Analysis of variance and student's t test, and Chi-squared tests and Wilcoxon rank sum test for  
52  
53 282 non-parametric variables, were conducted to compare study characteristics between urban and  
54  
55 283 rural young women. Structural equation modeling (SEM), was used to test and estimate the  
56  
57  
58  
59  
60

1  
2  
3 284 direct and indirect associations between variables, most especially the mediation roles of  
4  
5 285 physical activity (MVPA) or sedentary time (sitting), and body composition (BMI and WC), in the  
6  
7 286 association between SES and SBP. SEMs allow us to assess the mediation effects of multiple  
8  
9 287 mediators [55]. SEM decomposed SES-BP associations into two parts, direct (unmediated) and  
10  
11 288 indirect (mediated through MVPA/sitting and BMI/WC).

12  
13  
14 289 Direct, indirect and total effects were computed and recorded, and the proportion of the total  
15  
16 290 effect mediated was calculated. To evaluate the best fitting model for our data, we calculated  
17  
18 291 different goodness of fit indices including Chi-squared test, Root mean squared error of  
19  
20 292 approximation (RMSEA), Comparative fit index (CFI), Tucker-Lewis index (TLI) and Standardized  
21  
22 293 root mean squared residual (SRMR) [56]. Though the Chi-squared test has been popularly used  
23  
24 294 as a goodness of fit index, it has been reported to be biased and not reliable as the only  
25  
26 295 goodness of fit index. It is also highly sensitive to sample size [57, 58] , and often inflated with  
27  
28 296 non-normal data such as physical activity data and we therefore employed the Hu and  
29  
30 297 Bentler's Two-Index Presentation Strategy (1999) combination rule, with cut off values  
31  
32 298 depending on the fitness index, to determine the best model fit [56, 59]. We estimated the  
33  
34 299 coefficients ( $\beta$ ) with 95% confidence intervals (95% CI) for the direct, indirect and total effects  
35  
36 300 and also calculated the proportion of association mediated by indirect effects. If the direct and  
37  
38 301 indirect effects had opposite signs (negative or positive effects) the proportion mediated was  
39  
40 302 assessed using the absolute values for all indirect and direct effects [60].

41  
42  
43  
44  
45 303 All the analyses were conducted using STATA (version 13.0; STATA Corp., College Station,  
46  
47 304 TX, USA). We confirmed SEM results by running the SEM with the Satorra-Bentler and Huber-  
48  
49 305 White (Robust) Sandwich Estimator options [61] in STATA (version 15.1; STATA Corp.,  
50  
51 306 College Station, TX, USA). These options relax the normality assumption hence are robust to  
52  
53 307 non-normal data, which would be the case for mvpa and SES in the current study. A P-value <  
54  
55 308 0.05 was considered statistically significant.

1  
2  
3 3094  
5  
6 3107  
8  
9 31110  
11  
12 312 **Results**13  
14  
15 313 **Study characteristics**

16  
17  
18 314 Descriptive statistics for the non-pregnant study participants (urban, n=492; rural, n=476) are  
19  
20 315 presented in Table 2. There was no difference in BMI or waist circumference between the  
21  
22 316 urban and rural participants, but the prevalence of overweight and obesity was significantly  
23  
24 317 higher in the urban (46.5%) compared to the rural young women (38.8%). Household SES was  
25  
26 318 significantly higher in the urban compared to the rural group. Self-reported MVPA was  
27  
28 319 significantly higher in the rural than urban women ( $p<0.001$ ), and the urban women spent  
29  
30 320 significantly more time sitting than their rural counterparts ( $p<0.001$ ). Systolic and diastolic BP  
31  
32 321 were significantly higher in the urban group, as was the prevalence of elevated BP (27.0 vs.  
33  
34 322 9.3%).

35  
36  
37  
38 323 **Structural equation models for body mass index and waist circumference**

39  
40  
41 324 Results from the SEMs for SES associations with SBP via MVPA and BMI are presented in  
42  
43 325 Tables 3a, 3b and 3c for urban, rural and pooled analyses respectively, and also shown in  
44  
45 326 Figures 1, 2, 3. No significant direct or indirect effects via (MVPA or BMI) of SES on SBP  
46  
47 327 were observed in the urban women, but there were significant direct effects of SES on MVPA.  
48  
49 328 Results showed that individuals with a higher SES index were less likely to be physically active  
50  
51 329 in pooled data and urban women. In rural women, a one-unit increase in total household  
52  
53 330 assets was associated with a decrease of 0.65 mmHg (95% CI: -1.19 to -0.10) in SBP and an  
54  
55 331 increase of 0.27 kg/m<sup>2</sup> in BMI (95% CI: 0.1 to 0.53) (**Tables 3a, 3b and Figures 2, 3**). The

1  
2  
3 332 SEM for the pooled sample showed a significant indirect effect of household SES on SBP via  
4  
5 333 BMI, with 50% of the total effect being mediated by BMI (Table 3c and Figure 4). Direct  
6  
7 334 positive effects of BMI on SBP were observed in both settings and the pooled sample with a 1  
8  
9 335 kg/m<sup>2</sup> increase in BMI being associated with an increase of 0.37 mmHg (95% CI: 0.21 to 0.53)  
10  
11 336 and 0.33 (95% CI: 0.12 to 0.54) mmHg SBP in urban and rural young women, respectively.  
12  
13 337 Similar results were observed when including waist circumference as the body composition  
14  
15 338 indicator as shown in the SEM path diagrams with estimates in Figure S1 (supplementary  
16  
17 339 data). The results from the SEMs with the Satorra-Bentler adjustment option, accounting for  
18  
19 340 non-normality of the exposure, are shown in Figure S2 (supplementary data).  
20  
21  
22

## 23 341 Discussion

24  
25  
26 342 A rising prevalence of hypertension has been reported in South Africa. Peer and colleagues  
27  
28 343 reported a higher prevalence in 2008 (35.6%) compared to 1990 (21.6 %) in men and women  
29  
30 344 aged 25-74 years in an urban black community in Cape Town, South Africa [40]. We have  
31  
32 345 shown in young adult women from urban and rural South Africa, an overall elevated BP  
33  
34 346 prevalence of 18.4 % (27.0 % in urban and 9.3 % in rural). We have also shown a direct  
35  
36 347 effect of BMI on SBP in the urban and rural women separately, as well as when pooled,  
37  
38 348 thereby providing further evidence of an association between overall adiposity and blood  
39  
40 349 pressure. The total effects of SES on SBP were the same in both settings.  
41  
42

43  
44 350 Prevalence data on elevated BP and hypertension from other countries in SSA have shown  
45  
46 351 conflicting results when comparing urban and rural communities. In Malawi, a higher prevalence  
47  
48 352 of hypertension in urban compared to rural communities has been reported and attributed to  
49  
50 353 differences in lifestyle as rural communities participate in subsistence based agricultural  
51  
52 354 activities while the urban community has a more westernized lifestyle with higher salt intake  
53  
54 355 and lower physical inactivity [9]. Similarly, data from Ghana have shown a higher mean SBP  
55  
56  
57  
58  
59  
60

1  
2  
3 356 and DBP and a higher prevalence of hypertension in urban communities [18, 62]. In the  
4  
5 357 PURE study in South Africa, Pisa and colleagues reported that both urban adult men and  
6  
7 358 women had higher mean blood pressures in comparison to their rural peers though the overall  
8  
9 359 CVD risk factors were equally prevalent in both settings [41]. In contrast, findings from  
10  
11 360 Cameroon have reported a higher BP prevalence in rural compared to urban men and women  
12  
13 361 older than 40 years old, while Kenyan studies have reported no significant differences [16, 63].  
14  
15 362 Results from six urban and rural sites in four SSA countries - Kenya, South Africa, Ghana and  
16  
17 363 Burkina Faso - have reported a prevalence of hypertension in women aged between 40 and 60  
18  
19 364 years ranging from 15.1% in rural Burkina Faso to 54.1% in urban South Africa [10]. It was  
20  
21 365 also reported that in all three South African sites, both rural and urban, the prevalence of  
22  
23 366 hypertension was higher than in the other three countries [10]. These findings show the  
24  
25 367 complex health transitions occurring in SSA and the impact that this is having on cardio-  
26  
27 368 metabolic disease risk.

28  
29  
30  
31 369 Our study showed significant differences in SES between the urban and rural samples, as well  
32  
33 370 a big variation in SES within these two settings. The social patterning of CVD risk factors,  
34  
35 371 including hypertension, in SSA and LMICs has in part been attributed to differences in  
36  
37 372 countries' socioeconomic development. Previous results from five countries, (two high income  
38  
39 373 and three LMICs), reported that hypertension and other CVD risk factors were substantially  
40  
41 374 associated with education and wealth status; individuals with less education and lower wealth  
42  
43 375 generally showing higher prevalence of CVD risk factors [64] . The effect of SES in this study  
44  
45 376 is most evident in the rural women for whom household SES was lower (compared to urban)  
46  
47 377 and who may be transitioning faster (both nutritionally and economically) than the urban young  
48  
49 378 women. Though SES is positively associated with BMI in rural young women, it is negatively  
50  
51 379 associated with SBP. There may be other factors, such as physical activity due to agricultural  
52  
53 380 activities or dietary patterns, which were not recorded. In addition, the weight gain observed  
54  
55  
56  
57  
58  
59  
60

1  
2  
3 381 might not be due to fat mass, which has been reported to be positively associated with SBP  
4  
5 382 before [65], but rather to muscle mass and bone mass.  
6  
7

8 383 In Mexico, women in rural and upper SES categories were likely to have a higher SBP, while  
9  
10 384 we have reported that a higher SES was associated with a decrease in SBP in rural  
11  
12 385 communities. At a population level, there is a need to consider different SES categories and  
13  
14 386 monitor the effects of transitioning from one SES category to another on hypertension, since  
15  
16 387 these categories may respond differently to an increase or a decrease in their SES. Kagura  
17  
18 388 and colleagues tracked SES in South African children and reported that moving from the low  
19  
20 389 SES in infancy to a higher SES in adolescence had a protective effect on SBP level in young  
21  
22 390 adulthood [26]. Our results have shown that this could be more pronounced in rural areas.  
23  
24  
25

26 391 We observed a positive association between SES and BMI in the rural sample and the same  
27  
28 392 direction of effects was observed in the urban, though not significant. This is in line with results  
29  
30 393 reported in many LMICs including South Africa, but in contrast with those reported in higher  
31  
32 394 income populations [33, 34, 64]. A systematic review of studies between 1989 to 2007  
33  
34 395 reported that SES was positively associated with obesity in the middle transitioning economies  
35  
36 396 such as South Africa and Jamaica [66]. We have shown that both in the rural and urban  
37  
38 397 participants (not significant), a higher SES resulted in reduced SBP, while the pooled analysis  
39  
40 398 showed a positive total effect association between SES and SBP. This could be due to the  
41  
42 399 introduction of more variation in SES when data from both sites are pooled; with many  
43  
44 400 individuals with low SES in the rural area, the associations became skewed towards the low  
45  
46 401 SES individuals. This may suggest that different transitional levels of SES have different effects  
47  
48 402 on hypertension risk depending on the environment (either urban or rural). Though not  
49  
50 403 significant, the total effects of SES on SBP are the same in both rural and urban hence the  
51  
52 404 differences in prevalence cannot be explained by the setting or SES alone. In urban and rural  
53  
54 405 settings of four countries (Kenya, Namibia, Nigeria and Tanzania), the prevalence of age  
55  
56  
57  
58  
59  
60



1  
2  
3 406 standardized hypertension was similarly high and ranging from 19.3 % to 38.0 % [11]. Cois and  
4  
5 407 colleagues reported that a higher SES was associated with lower SBP in a nationally  
6  
7 408 representative sample of South African women [25] using SEM models. Alcohol use, PA,  
8  
9 409 smoking and resting heart rate and BMI were reported to be the mediators of the indirect of  
10  
11 410 the association between SES and SBP in men but not in women, suggesting that other factors  
12  
13 411 may play a major role in women [25]. Similarly, our results show that neither PA nor BMI  
14  
15 412 mediate the association between SES and SBP in urban and rural settings in isolation,  
16  
17 413 suggesting that other factors may explain the association. Among those, dietary patterns and  
18  
19 414 stress have been reported to be independently associated with SBP [67, 68].  
20  
21  
22

23 415 The significant direct associations between BMI and SBP are in line with other findings in  
24  
25 416 South Africa and within the SSA region [11, 33, 40, 42, 69, 70]. This link was consistent in  
26  
27 417 rural, urban and pooled data sets, indicating the importance of BMI in the aetiology of high BP.  
28  
29 418 Munthali and colleagues reported that the link between obesity and hypertension could be  
30  
31 419 observed as early as five years of age. Children with early onset of obesity were at higher risk  
32  
33 420 of developing hypertension in late adolescence [38].  
34  
35

36 421 In this study, using SEM models to explore the mediation role of BMI and PA helped quantify  
37  
38 422 potential contributions of these variables to the effect of SES on SBP. The results show that  
39  
40 423 PA was not a significant mediator in the association between SES and BP in the urban or the  
41  
42 424 rural samples. SES was negatively associated with MVPA in urban and pooled samples,  
43  
44 425 indicating that as individuals transition from low to higher SES, they reduce their physical  
45  
46 426 activity level. We speculate that these differences in the association between SES and SBP in  
47  
48 427 both our rural and urban results, and in those from high-income countries are due to  
49  
50 428 differences in levels of nutritional and epidemiological transition in these regions [71, 72]. Those  
51  
52 429 with low SES in high-income countries are likely to consume cheaper, more energy dense  
53  
54 430 foods, participate in less leisure time PA and be more sedentary [73, 74]. In LMICs,  
55  
56  
57  
58  
59  
60

1  
2  
3 431 agricultural activities remain a part of everyday life and a day-to-day activity in rural living,  
4  
5 432 while those with higher SES in the same settings rapidly adopt the westernized life style with  
6  
7 433 less PA, fewer agricultural activities and home grown food. However, this speculation is not  
8  
9 434 supported by the data on PA in this study despite the rural participants having a higher PA.  
10  
11 435 Our understanding of the Agincourt rural economy is that agriculture is quite a minor aspect  
12  
13  
14 436 though very useful to augment the household income.

15  
16  
17 437 The limitations of this study are that other unmeasured data, such as undernutrition in infancy,  
18  
19 438 which is a known risk factor for high BP later in life [75], and dietary patterns were not  
20  
21 439 included in the current analyses. We are currently working on research to address this  
22  
23 440 limitation. We can also not rule out the role of genetics. Secondly, the low reliability of self-  
24  
25 441 report data on PA could introduce bias. Thus, there is need for more precise, objective  
26  
27 442 measures of physical activity to strengthen the results of our analysis. Lastly, longitudinal data,  
28  
29 443 especially as the socioeconomic environment is changing rapidly due to rural-urban labor  
30  
31 444 migration and other factors would be helpful to examine these associations over time. The  
32  
33 445 cross-sectional design lacks a temporal component between the factors analyzed. Thus, it is  
34  
35 446 difficult to say anything certain about the direction of the associations, hence the need for the  
36  
37 447 longitudinal data.

38  
39  
40  
41 448

## 42 43 449 **Conclusions**

44  
45  
46 450 Though the prevalence of overweight or obesity is relatively higher in both rural and urban than  
47  
48 451 those reported in other SSA countries, women in the urban setting were at more risk for  
49  
50 452 elevated blood pressure than their rural counterparts. The link between SES and SBP varies in  
51  
52 453 a more economically diverse population, as seen with the pooled rural and urban dataset, with  
53  
54  
55 454 BMI being the most likely mediator. There is need to consider optimizing BMI as a key

1  
2  
3 455 intervention strategy in young adults in part to combat hypertension. Our findings should be  
4  
5 456 replicated with prospective data.  
6  
7

8 457  
9

#### 10 11 458 **Funding** 12 13

14 459 Norris is supported by the UK MRC DfID African Research Leader Scheme and by the DST-  
15  
16 460 NRF Centre of Excellence in Human Development at the University of the Witwatersrand,  
17  
18 461 Johannesburg. Birth to Twenty data collection was supported by the Wellcome Trust under  
19  
20 462 Grant [092097/Z/10/Z]. The MRC/Wits- Agincourt Unit is supported by the South African Medical  
21  
22 463 Research Council, and the Wellcome Trust under Grants [058893/Z/99/A, 069683/Z/02/Z,  
23  
24 464 085477/Z/08/Z, 085477/B/08/Z]. Opinions expressed and conclusions arrived at, are those of the  
25  
26 465 authors and are not to be attributed to the CoE in Human Development.  
27  
28

#### 29 466 **Conflict of interest** 30

31 467 Authors have no conflicts of interest to disclose.  
32

#### 33 468 **Consent for publication** 34

35 469 Not applicable  
36

#### 37 470 **Data Sharing** 38

39 471 The datasets used and/or analysed during the current study are available from the  
40  
41 472 Developmental Pathways  
42  
43 473 for Health Research Unit data management department by contacting Prof. Shane A Norris on  
44  
45 474 reasonable request  
46  
47

#### 48 475 **Competing interest** 49

50 476 The authors declare that they have no competing interests  
51

#### 52 477 **Authors' contributions** 53 54 55 56 57 58 59 60

1  
2  
3 478 RJM and SAN conceptualized the manuscript. RJM analyzed the data. RJM MM RSM JK ST  
4  
5 479 KK FXG LKM DD SAN interpreted the data. RJM wrote the manuscript and all authors were  
6  
7 480 involved in editing and approving the final manuscript.  
8  
9

#### 10 481 **Acknowledgements**

11 482 We wish to thank the Bt20+ and Agincourt participants for taking part in the study and the  
12  
13 483 Bt20+ and Agincourt  
14  
15 484 team for their relentless support throughout the study.  
16  
17

18 485

#### 19 486 **Ethics Approval and Consent to Participate**

20 487 Prior to the study, the study protocols were approved by the Human Research Ethics  
21  
22 488 Committee of the University of the Witwatersrand (Clearance certificates M120138 for the  
23  
24 489 Ntshembo-Hope Cross Sectional Survey in Agincourt and M111182 for the BT20+ survey).  
25  
26 490 Independent written informed consent to participate was obtained from participants.  
27  
28  
29

30 491

31 492

32 493

33 494

34 495

35 496

36 497

37 498

38 499

39 500

1  
2  
3 501  
4  
5  
6 502  
7  
8  
9 503  
10  
11  
12 504  
13  
14  
15 505  
16  
17  
18 506  
19  
20 507  
21 508  
22 509  
23 510  
24 511  
25 512  
26 513  
27 514  
28 515  
29 516  
30 517  
31 518  
32 519  
33 520  
34 521  
35 522  
36 523  
37 524  
38 525  
39 526  
40 527  
41 528  
42 529  
43 530  
44 531  
45 532  
46 533  
47 534  
48 535  
49 536  
50 537  
51 538  
52  
53  
54  
55  
56  
57  
58  
59  
60

## References

1. Lim SS, Vos T, Flaxman AD, Danaei G, Shibuya K, Adair-Rohani H, AlMazroa MA, Amann M, Anderson HR, Andrews KG *et al*: **A comparative risk assessment of burden of disease and injury attributable to 67 risk factors and risk factor clusters in 21 regions, 1990–2010: a systematic analysis for the Global Burden of Disease Study 2010.** *The Lancet* 2012, **380**(9859):2224-2260.
2. Lozano R, Naghavi M, Foreman K, Lim S, Shibuya K, Aboyans V, Abraham J, Adair T, Aggarwal R, Ahn SY: **Global and regional mortality from 235 causes of death for 20 age groups in 1990 and 2010: a systematic analysis for the Global Burden of Disease Study 2010.** *The Lancet* 2013, **380**(9859):2095-2128.
3. Ezzati M, Geleijnse J: **Worldwide trends in blood pressure from 1975 to 2015.** *The Lancet* 2017, **389**(10064):37-55.
4. Sarki AM, Nduka CU, Stranges S, Kandala N-B, Uthman OA: **Prevalence of Hypertension in Low- and Middle-Income Countries: A Systematic Review and Meta-Analysis.** *Medicine* 2015, **94**(50):e1959.
5. Chow CK, Teo KK, Rangarajan S, Islam S, Gupta R, Avezum A, Bahonar A, Chifamba J, Dagenais G, Diaz R: **Prevalence, awareness, treatment, and control of hypertension in rural and urban communities in high-, middle-, and low-income countries.** *Jama* 2013, **310**(9):959-968.
6. Kearney PM, Whelton M, Reynolds K, Muntner P, Whelton PK, He J: **Global burden of hypertension: analysis of worldwide data.** *The lancet* 2005, **365**(9455):217-223.
7. Norman R, Gaziano T, Laubscher R, Steyn K, Bradshaw D, Collaboration SACRA: **Estimating the burden of disease attributable to high blood pressure in South Africa in 2000.** *South African Medical Journal* 2007, **97**(8):692-698.
8. Addo J, Smeeth L, Leon DA: **Hypertension in Sub-Saharan Africa a systematic review.** *Hypertension* 2007, **50**(6):1012-1018.
9. Simmons D, Barbour G, Congleton J, Levy J, Meacher P, Saul H, Sowerby T: **Blood pressure and salt intake in Malawi: an urban rural study.** *Journal of epidemiology and community health* 1986, **40**(2):188-192.
10. Gómez-Olivé FX, Ali SA, Made F, Kyobutungi C, Nonterah E, Micklesfield L, Alberts M, Boua R, Hazelhurst S, Debpuur C: **Stark Regional and Sex Differences in the Prevalence and Awareness of Hypertension: An H3Africa AWI-Gen Study Across 6 Sites in Sub-Saharan Africa.** *Global Heart* 2017.

- 1  
2  
3 539 11. Hendriks ME, Wit FW, Roos MT, Brewster LM, Akande TM, de Beer IH, Mfinanga SG, Kahwa  
4 540 AM, Gatongi P, Van Rooy G: **Hypertension in sub-Saharan Africa: cross-sectional**  
5 541 **surveys in four rural and urban communities.** *PloS one* 2012, **7(3):e32638.**  
6 542 12. Lemogoum D, Seedat YK, Mabadeje AF, Mendis S, Bovet P, Onwubere B: **International**  
7 543 **Forum for Hypertension control and prevention in Africa. Recommendations for**  
8 544 **prevention, diagnosis and management of hypertension and cardiovascular risk**  
9 545 **factors in sub-Saharan Africa.** *J Hypertens* 2003, **21.**  
10 546 13. Schutte A, Botha S, Fourie C, Gafane-Matemane L, Kruger R, Lammertyn L, Malan L, Mels C,  
11 547 Schutte R, Smith W: **Recent advances in understanding hypertension development in**  
12 548 **sub-Saharan Africa.** *Journal of Human Hypertension* 2017.  
13 549 14. Thorogood M, Connor MD, Lewando Hundt G, Tollman SM: **Understanding and managing**  
14 550 **hypertension in an African sub-district: A multidisciplinary approach1.** *Scandinavian*  
15 551 *Journal of Public Health* 2007, **35(69 suppl):52-59.**  
16 552 15. Yusufali A, Khatib R, Islam S, AlHabib K, Kelishadi R, Rangarajan S, Yusuf S: **LBOS 03-01**  
17 553 **PREVALENCE, AWARENESS, TREATMENT, AND CONTROL OF HYPERTENSION IN THE**  
18 554 **MIDDLE EAST: RESULTS FROM THE PROSPECTIVE URBAN RURAL EPIDEMIOLOGY**  
19 555 **(PURE) STUDY.** *J Hypertens* 2016, **34 Suppl 1:e551.**  
20 556 16. Poulter N, Khaw K, Hopwood B, Mugambi M, Peart W, Rose G, Sever P: **Blood pressure and**  
21 557 **its correlates in an African tribe in urban and rural environments.** *Journal of*  
22 558 *epidemiology and community health* 1984, **38(3):181-185.**  
23 559 17. Glass TA, McAtee MJ: **Behavioral science at the crossroads in public health: extending**  
24 560 **horizons, envisioning the future.** *Social science & medicine* 2006, **62(7):1650-1671.**  
25 561 18. Agyemang C: **Rural and urban differences in blood pressure and hypertension in**  
26 562 **Ghana, West Africa.** *Public Health* 2006, **120.**  
27 563 19. Agyemang C, Redekop WK, Owusu-Dabo E, Bruijnzeels MA: **Blood pressure patterns in**  
28 564 **rural, semi-urban and urban children in the Ashanti region on Ghana, West Africa.**  
29 565 *BMC Public Health* 2005, **5.**  
30 566 20. Kagura J, Adair LS, Musa MG, Pettifor JM, Norris SA: **Blood pressure tracking in urban**  
31 567 **black South African children: birth to twenty cohort.** *BMC pediatrics* 2015, **15(1):1.**  
32 568 21. Goon D, Amusa L, Mhlongo D, Khoza L, Any-Anwu F: **Elevated blood pressure among**  
33 569 **Rural South African Children in Thohoyandou, South Africa.** *Iran J Pub Health* 2013, **42.**  
34 570 22. Kemp C, Pienaar AE, Schutte AE: **The prevalence of hypertension and the relationship**  
35 571 **with body composition in Grade 1 learners in the North West Province of South**  
36 572 **Africa.** *South African Journal of Sports Medicine* 2011, **23(4).**  
37 573 23. Monyeki K, Kemper H, Makgae P: **The association of fat patterning with blood pressure**  
38 574 **in rural South African children: the Ellisras Longitudinal Growth and Health Study.**  
39 575 *International journal of epidemiology* 2006, **35(1):114-120.**  
40 576 24. Schutte A, Van Rooyen J, Huisman H, Kruger H, Malan N, De Ridder J: **Dietary risk markers**  
41 577 **that contribute to the aetiology of hypertension in black South African children: the**  
42 578 **THUSA BANA study.** *Journal of human hypertension* 2003, **17(1):29-35.**  
43 579 25. Cois A, Ehrlich R: **Analysing the socioeconomic determinants of hypertension in South**  
44 580 **Africa: a structural equation modelling approach.** *BMC public health* 2014, **14(1):414.**  
45 581 26. Kagura J, Adair LS, Pisa PT, Griffiths PL, Pettifor JM, Norris SA: **Association of**  
46 582 **socioeconomic status change between infancy and adolescence, and blood pressure,**  
47 583 **in South African young adults: Birth to Twenty Cohort.** *BMJ open* 2016, **6(3):e008805.**  
48 584 27. Wilson DK, Kliewer W, Plybon L, Sica DA: **Socioeconomic status and blood pressure**  
49 585 **reactivity in healthy black adolescents.** *Hypertension* 2000, **35(1):496-500.**  
50 586 28. Brummett BH, Babyak MA, Siegler IC, Shanahan M, Harris KM, Elder GH, Williams RB:  
51 587 **Systolic Blood Pressure, Socioeconomic Status, and Biobehavioral Risk Factors in a**  
52 588 **Nationally Representative US Young Adult Sample.** *Hypertension* 2011, **58(2):161-166.**  
53  
54  
55  
56  
57  
58  
59  
60



- 1  
2  
3 589 29. Chaix B, Bean K, Leal C, Thomas F, Havard S, Evans D, Jégo B, Pannier B:  
4 590 **Individual/Neighborhood Social Factors and Blood Pressure in the RECORD Cohort**  
5 591 **Study. Which Risk Factors Explain the Associations?** 2010, **55(3):769-775.**  
6 592 30. Griffiths PL, Sheppard ZA, Johnson W, Cameron N, Pettifor JM, Norris SA: **Associations**  
7 593 **between household and neighbourhood socioeconomic status and systolic blood**  
8 594 **pressure among urban South African adolescents.** *Journal of biosocial science* 2012,  
9 595 **44(04):433-458.**  
10 596 31. Longo-Mbenza B, Luila EL, M'Buyamba-Kabangu J: **Nutritional status, socio-economic**  
11 597 **status, heart rate, and blood pressure in African school children and adolescents.**  
12 598 *International journal of cardiology* 2007, **121(2):171-177.**  
13 599 32. Aounallah-Skhiri H, El Ati J, Traissac P, Romdhane HB, Eymard-Duvernay S, Delpuech F,  
14 600 Achour N, Maire B: **Blood pressure and associated factors in a North African adolescent**  
15 601 **population. A national cross-sectional study in Tunisia.** *BMC Public Health* 2012,  
16 602 **12(1):1.**  
17 603 33. Afrifa-Anane E, Agyemang C, Codjoe SNA, Ogedegbe G, Aikins Ad-G: **The association of**  
18 604 **physical activity, body mass index and the blood pressure levels among urban poor**  
19 605 **youth in Accra, Ghana.** *BMC public health* 2015, **15(1):269.**  
20 606 34. Anane AE, Agyemang C, Codjoe SNA, Ogedegbe G, Aikins A: **The association of physical**  
21 607 **activity, Body mass index and blood pressure among urban poor youth in Accra,**  
22 608 **Ghana.** *BMC Public Health* 2015, **15.**  
23 609 35. Hu G, Barengo NC, Tuomilehto J, Lakka TA, Nissinen A, Jousilahti P: **Relationship of**  
24 610 **physical activity and body mass index to the risk of hypertension: a prospective study**  
25 611 **in Finland.** *Hypertension* 2004, **43(1):25-30.**  
26 612 36. Juraschek SP, Blaha MJ, Whelton SP, Blumenthal R, Jones SR, Keteyian SJ, Schairer J, Brawner  
27 613 CA, Al-Mallah MH: **Physical fitness and hypertension in a population at risk for**  
28 614 **cardiovascular disease: the Henry Ford Exercise Testing (FIT) Project.** *Journal of the*  
29 615 *American Heart Association* 2014, **3(6):e001268.**  
30 616 37. Väistö J, Eloranta A-M, Viitasalo A, Tompuri T, Lintu N, Karjalainen P, Lampinen E-K, Ågren J,  
31 617 Laaksonen DE, Lakka H-M: **Physical activity and sedentary behaviour in relation to**  
32 618 **cardiometabolic risk in children: cross-sectional findings from the Physical Activity**  
33 619 **and Nutrition in Children (PANIC) Study.** *International Journal of Behavioral Nutrition*  
34 620 *and Physical Activity* 2014, **11(1):55.**  
35 621 38. Munthali RJ, Kagura J, Lombard Z, Norris SA: **Childhood adiposity trajectories are**  
36 622 **associated with late adolescent blood pressure: birth to twenty cohort.** *BMC Public*  
37 623 *Health* 2016, **16(1):1-10.**  
38 624 39. STATSSA: **Mortality and causes of death in South Africa, 2015: Findings from death**  
39 625 **notification.** In. Pretoria: Statistics South Africa; 2017 1-140. .  
40 626 40. Peer N, Steyn K, Lombard C, Gwebushe N, Levitt N: **A high burden of hypertension in the**  
41 627 **urban black population of Cape Town: The Cardiovascular Risk in Black South**  
42 628 **Africans (CRIBSA) Study.** *PLoS One* 2013, **8(11):e78567.**  
43 629 41. Pisa P, Behanan R, Vorster H, Kruger A: **Social drift of cardiovascular disease risk factors**  
44 630 **in Africans from the North West Province of South Africa: the PURE study:**  
45 631 **cardiovascular topics.** *Cardiovascular journal of Africa* 2012, **23(7):371-388.**  
46 632 42. Steyn K, Fourie J, Lombard C, Katzenellenbogen J, Bourne L, Jooste P: **Hypertension in the**  
47 633 **black community of the Cape Peninsula, South Africa.** *East African medical journal* 1996,  
48 634 **73(11):758-763.**  
49 635 43. Tibazarwa K, Ntyintyane L, Sliwa K, Gerntholtz T, Carrington M, Wilkinson D, Stewart S: **A**  
50 636 **time bomb of cardiovascular risk factors in South Africa: results from the Heart of**  
51 637 **Soweto Study “Heart Awareness Days”.** *International journal of cardiology* 2009,  
52 638 **132(2):233-239.**  
53  
54  
55  
56  
57  
58  
59  
60

- 1  
2  
3 639 44. Kahn K, Collinson MA, Gómez-Olivé FX, Mokoena O, Twine R, Mee P, Afolabi SA, Clark BD,  
4 640 Kabudula CW, Khosa A: **Profile: Agincourt health and socio-demographic surveillance**  
5 641 **system**. *International journal of epidemiology* 2012, **41**(4):988-1001.
- 6 642 45. Pradeilles R, Rousham EK, Norris SA, Griffiths PL: **Urban South African adolescents'**  
7 643 **perceptions of their neighborhood socio-economic environments: the Birth to**  
8 644 **Twenty plus cohort study**. *Children Youth and Environments* 2014, **24**(3):173-200.
- 9 645 46. Richter L, Norris S, Pettifor J, Yach D, Cameron N: **Cohort profile: Mandela's children: the**  
10 646 **1990 Birth to Twenty study in South Africa**. *International journal of epidemiology* 2007,  
11 647 **36**(3):504-511.
- 12 648 47. Chobanian AV: **Joint National Committee on Prevention, Detection, Evaluation, and**  
13 649 **Treatment of High Blood Pressure**. National Heart, Lung, and Blood Institute; National  
14 650 **High Blood Pressure Education Program Coordinating Committee: Seventh report of**  
15 651 **the Joint National Committee on Prevention, Detection, Evaluation, and Treatment of**  
16 652 **High Blood Pressure**. *Hypertension* 2003, **42**:1206-1252.
- 17 653 48. Strandberg TE, Pitkala K: **What is the most important component of blood pressure:**  
18 654 **systolic, diastolic or pulse pressure?** *Current opinion in nephrology and hypertension*  
19 655 2003, **12**(3):293-297.
- 20 656 49. Cameron N: **The measurement of human growth**: Taylor & Francis; 1984.
- 21 657 50. Lohman TG, Roche AF, Martorell R: **Anthropometric standardization reference manual:**  
22 658 **Human kinetics books**; 1988.
- 23 659 51. Houweling TA, Kunst AE, Mackenbach JP: **Measuring health inequality among children**  
24 660 **in developing countries: does the choice of the indicator of economic status matter?**  
25 661 *International journal for equity in health* 2003, **2**(1):8.
- 26 662 52. Feeley AB, Musenge E, Pettifor JM, Norris SA: **Investigation into longitudinal dietary**  
27 663 **behaviours and household socio-economic indicators and their association with BMI**  
28 664 **Z-score and fat mass in South African adolescents: the Birth to Twenty (Bt20) cohort**.  
29 665 *Public health nutrition* 2013, **16**(04):693-703.
- 30 666 53. Jones LL, Griffiths PL, Adair LS, Norris SA, Richter LM, Cameron N: **A comparison of the**  
31 667 **socio-economic determinants of growth retardation in South African and Filipino**  
32 668 **infants**. *Public health nutrition* 2008, **11**(12):1220-1228.
- 33 669 54. Bull FC, Maslin TS, Armstrong T: **Global physical activity questionnaire (GPAQ): nine**  
34 670 **country reliability and validity study**. *Journal of Physical Activity and health* 2009,  
35 671 **6**(6):790-804.
- 36 672 55. VanderWeele TJ: **Mediation analysis: a practitioner's guide**. *Annual review of public*  
37 673 *health* 2016, **37**:17-32.
- 38 674 56. Hu Lt, Bentler PM: **Cutoff criteria for fit indexes in covariance structure analysis:**  
39 675 **Conventional criteria versus new alternatives**. *Structural equation modeling: a*  
40 676 *multidisciplinary journal* 1999, **6**(1):1-55.
- 41 677 57. Schermelleh-Engel K, Moosbrugger H, Müller H: **Evaluating the fit of structural equation**  
42 678 **models: Tests of significance and descriptive goodness-of-fit measures**. *Methods of*  
43 679 *psychological research online* 2003, **8**(2):23-74.
- 44 680 58. Vandenberg RJ: **Introduction: Statistical and Methodological Myths and Urban**  
45 681 **Legends: Where, Pray Tell, Did They Get This Idea?** In.: Sage Publications Sage CA:  
46 682 Thousand Oaks, CA; 2006.
- 47 683 59. Fan X, Sivo SA: **Sensitivity of fit indexes to misspecified structural or measurement**  
48 684 **model components: Rationale of two-index strategy revisited**. *Structural Equation*  
49 685 *Modeling* 2005, **12**(3):343-367.
- 50 686 60. Alwin DF, Hauser RM: **The decomposition of effects in path analysis**. *American*  
51 687 *sociological review* 1975:37-47.



- 1  
2  
3 688 61. Williams R, Allison PD, Moral-Benito E: **Xtdpdml: Linear dynamic panel-data estimation using maximum likelihood and structural equation modeling**. In.; 2016.
- 4 689  
5 690 62. Kerry SM, Emmett L, Micah FB, Martin-Peprah R, Antwi S, Phillips RO, Plange-Rhule J, Eastwood JB, Cappuccio FP: **Rural and semi-urban differences in salt intake, and its dietary sources, in Ashanti, West Africa**. *Ethnicity & disease* 2005, **15**(1):33-39.
- 6 691  
7 692  
8 693 63. Lissock CNA, Sobngwi E, Ngassam E, Ngoa LSE: **Rural and urban differences in metabolic profiles in a Cameroonian population**. *Pan African Medical Journal* 2011, **10**.
- 9 694  
10 695 64. Stringhini S, Forrester TE, Plange-Rhule J, Lambert EV, Viswanathan B, Riesen W, Korte W, Levitt N, Tong L, Dugas LR: **The social patterning of risk factors for noncommunicable diseases in five countries: evidence from the modeling the epidemiologic transition study (METS)**. *BMC Public Health* 2016, **16**(1):956.
- 11 696  
12 697  
13 698  
14 699 65. de Hoog ML, van Eijsden M, Stronks K, Gemke RJ, Vrijkotte TG: **Association between body size and blood pressure in children from different ethnic origins**. *Cardiovascular diabetology* 2012, **11**(1):136.
- 15 700  
16 701  
17 702 66. Dinsa G, Goryakin Y, Fumagalli E, Suhrcke M: **Obesity and socioeconomic status in developing countries: a systematic review**. *Obesity reviews* 2012, **13**(11):1067-1079.
- 18 703  
19 704 67. Masala G, Bendinelli B, Versari D, Saieva C, Ceroti M, Santagiuliana F, Caini S, Salvini S, Sera F, Taddei S: **Anthropometric and dietary determinants of blood pressure in over 7000 Mediterranean women: the European Prospective Investigation into Cancer and Nutrition-Florence cohort**. *Journal of hypertension* 2008, **26**(11):2112-2120.
- 20 705  
21 706  
22 707  
23 708 68. Wilson BL, Albright GL, Steiner SS, Andreassi JL: **Cardiodynamic response to psychological and cold pressor stress: further evidence for stimulus response specificity and directional fractionation**. *Biofeedback and Self-regulation* 1991, **16**(1):45-53.
- 24 709  
25 710  
26 711  
27 712 69. Goon D, Amusa L, Mhlongo D, Khoza L, Any-Anwu F: **Elevated blood pressure among rural South African children in Thohoyandou, South Africa**. *Iranian journal of public health* 2013, **42**(5):489.
- 28 713  
29 714  
30 715 70. Moselakgomo VK, Toriola AL, Shaw BS, Goon DT, Akinyemi O: **Body mass index, overweight, and blood pressure among adolescent schoolchildren in Limpopo province, South Africa**. *Revista Paulista de Pediatria* 2012, **30**(4):562-569.
- 31 716  
32 717  
33 718 71. Lynch JW, Smith GD, Kaplan GA, House JS: **Income inequality and mortality: importance to health of individual income, psychosocial environment, or material conditions**. *BMJ: British Medical Journal* 2000, **320**(7243):1200.
- 34 719  
35 720  
36 721 72. Ploubidis GB, Mathenge W, De Stavola B, Grundy E, Foster A, Kuper H: **Socioeconomic position and later life prevalence of hypertension, diabetes and visual impairment in Nakuru, Kenya**. *International journal of public health* 2013, **58**(1):133-141.
- 37 722  
38 723  
39 724 73. Drewnowski A: **The cost of US foods as related to their nutritive value**. *The American journal of clinical nutrition* 2010, **92**(5):1181-1188.
- 40 725  
41 726 74. Popkin BM: **The nutrition transition and obesity in the developing world**. *The Journal of nutrition* 2001, **131**(3):871S-873S.
- 42 727  
43 728 75. Sawaya AL, Sesso R, Florencio TM, Fernandes MT, Martins PA: **Association between chronic undernutrition and hypertension**. *Maternal & child nutrition* 2005, **1**(3):155-163.
- 44 729  
45 730  
46 731  
47 732  
48 733  
49  
50  
51  
52  
53  
54  
55  
56  
57  
58  
59  
60

1  
2  
3 734  
4  
5 735  
6  
7  
8 736  
9  
10 737  
11  
12  
13  
14  
15  
16  
17  
18  
19  
20  
21  
22  
23  
24  
25  
26  
27  
28  
29  
30  
31  
32  
33  
34  
35  
36  
37  
38  
39  
40  
41  
42  
43  
44  
45  
46  
47  
48  
49  
50  
51  
52  
53  
54  
55  
56  
57  
58  
59  
60

For peer review only

**Table 2:** Descriptive characteristics

|                                              | Total          | n   | Urban         | n   | Rural          | p value |
|----------------------------------------------|----------------|-----|---------------|-----|----------------|---------|
| Age (years)                                  | 22.04 (1.24)   | 492 | 22.77 (0.49)  | 476 | 21.28 (1.31)   | 0.001   |
| Weight (kg)                                  | 64.62 (14.82)  | 492 | 64.67 (15.6)  | 473 | 64.55 (14.03)  | 0.90    |
| Height (m)                                   | 1.61 (0.007)   | 492 | 1.60 (0.07)   | 475 | 1.61 (0.07)    | 0.001   |
| BMI (kg/m <sup>2</sup> )                     | 25.05 (5.59)   | 492 | 25.32 (5.91)  | 476 | 24.78 (5.24)   | 0.13    |
| BMI classification (%)                       |                | 492 |               | 476 |                | 0.015   |
| Underweight (<18.4 kg/m <sup>2</sup> )       | 5.98           |     | 7.10          |     | 4.82           |         |
| Normal weight (18.5-24.9 kg/m <sup>2</sup> ) | 51.34          |     | 46.45         |     | 56.39          |         |
| Overweight (25-29.9 kg/m <sup>2</sup> )      | 26.19          |     | 29.21         |     | 23.06          |         |
| Obese (≥30 kg/m <sup>2</sup> )               | 16.49          |     | 17.24         |     | 15.72          |         |
| Waist circumference (cm)                     | 80.60 (12.08)  | 492 | 80.18 (12.63) | 476 | 81.03 (11.47)  | 0.26    |
| Central obesity, WC ≥ 80 cm , %              | 43.81          | 492 | 45.70         | 476 | 44.74          | 0.55    |
| Household SES index (sum of assets)          | 7.24 (2.70)    | 492 | 8.83 (2.37)   | 476 | 5.59 (1.91)    | <0.001  |
| Total MVPA (min/week)*                       | 870(280-1810)  | 492 | 420(160-900)  | 385 | 1680(970-2580) | <0.001  |
| Sitting time (mins/day)*                     | 300 (240-480)  | 492 | 360 (240-480) | 385 | 300 (180-360)  | <0.001  |
| Systolic blood pressure                      | 106.68 (11.64) | 492 | 110.30 (11.4) | 471 | 102.89 (10.7)  | <0.001  |
| Diastolic blood pressure                     | 70.23 (9.00)   | 492 | 72.78 (8.3)   | 471 | 67.57 (9.0)    | <0.001  |
| BP classification (%)                        |                | 492 |               | 471 |                | <0.001  |
| Low BP                                       | 12.46          |     | 5.49          |     | 19.75          |         |
| Normal BP                                    | 69.16          |     | 67.48         |     | 70.91          |         |

|                                |       |     |       |     |       |        |
|--------------------------------|-------|-----|-------|-----|-------|--------|
| Prehypertension                | 16.20 |     | 23.58 |     | 8.49  |        |
| Hypertensive                   | 2.18  |     | 3.46  |     | 0.85  |        |
| Elevated BP (%)                | 18.38 |     | 27.04 |     | 9.34  | <0.001 |
| Highest Education attained (%) |       | 480 |       | 371 |       | <0.001 |
| Primary school                 | 1.18  |     | 0     |     | 2.70  |        |
| Secondary school               | 60.75 |     | 48.33 |     | 76.81 |        |
| Tertiary education             | 38.07 |     | 51.67 |     | 20.49 |        |

Data presented as mean (SD) otherwise stated; \* Median (IQR)

**Table 3a:** Structural equation model for SES, MVPA and BMI on SBP in urban women

| Effect of:<br>N=489         | Outcome:        | Direct effects(95% CI)   | Indirect effects( 95%<br>CI) | Total effects(95% CI)     | Proportion of total effect<br>mediated |
|-----------------------------|-----------------|--------------------------|------------------------------|---------------------------|----------------------------------------|
| <b>Household<br/>assets</b> | SBP<br>via BMI  | -0.34 (-0.75; 0.07)      | 0.05 (-0.05; 0.14)           | -0.29 (-0.70; 0.12)       | 0.13 <sup>a</sup>                      |
|                             | BMI<br>via MVPA | 0.13 (-0.09; 0.35)       | -0.014 (-0.05; 0.013)        | 0.11 (-0.11; 0.33)        | 0.1 <sup>a</sup>                       |
|                             | MVPA            | -41.71 (-73.48; -9.94)** |                              | -41.71 (-73.48; -9.94)**  |                                        |
| <b>MVPA</b>                 | SBP<br>via BMI  | -0.0002 (-0.001; 0.001)  | 0.0001 (-0.0001;<br>0.0004)  | -0.0000 (-0.0012; 0.0011) | 0.3 <sup>a</sup>                       |
| <b>BMI</b>                  | SBP             | 0.37 (0.21; 0.53)***     |                              | 0.37 (0.21; 0.53)***      |                                        |

Adjusted for age; \* P<0.05; \*\* P< 0.01; \*\*\*P< 0.001; SBP; systolic blood pressure, MVPA; moderate to vigorous intensity physical activity, BMI; body mass index, SES; social economic status, <sup>a</sup> Assessed using the absolute values for both indirect and direct effects

**Urban Fit Indices:** LR test of model vs. saturated:  $\chi^2(4) = 0.97$ , Prob >  $\chi^2 = 0.91$ ; RMSEA = 0.00; CFI= 1.00 Comparative

1  
2  
3  
4  
5  
6  
7  
8  
9  
10  
11  
12  
13  
14  
15  
16  
17  
18  
19  
20  
21  
22  
23  
24  
25  
26  
27  
28  
29  
30  
31  
32  
33  
34  
35  
36  
37  
38  
39  
40  
41  
42  
43  
44  
45  
46  
47

fit index;

TLI= 1.12 Tucker-Lewis index; **SRMR=0.011**: Standardized root mean squared residual, CD= 0.017 Coefficient of determination.

For peer review only

**Table 3b:** Structural equation model for SES, MVPA and BMI on SBP in rural women

| Effect of:<br>N= 378        | Outcome:        | Direct effects(95% CI)   | Indirect effects( 95%<br>CI) | Total effects(95% CI)    | Proportion of total effect<br>mediated |
|-----------------------------|-----------------|--------------------------|------------------------------|--------------------------|----------------------------------------|
| <b>Household<br/>assets</b> | SBP<br>via BMI  | -0.65 (-1.19; -0.096)*   | 0.08 (-0.04; 0.19)           | -0.56 (-1.12; -0.02)*    | 0.11 <sup>a</sup>                      |
|                             | BMI<br>via MVPA | 0.27 (0.01; 0.53)*       | -0.01 (-0.04; 0.01)          | 0.26 (-0.005; 0.53)*     | 0.04                                   |
|                             | MVPA            | -29.51 (-87.81; 28.78)   |                              | -29.51 (-87.81; 28.78)   |                                        |
| <b>MVPA</b>                 | SBP<br>via BMI  | 0.0004 (-.0005729 .0013) | 0.0001 (-0.0000;<br>0.0003)  | 0.0005 (-0.0005; 0.0015) | 0.2                                    |
| <b>BMI</b>                  | SBP             | 0.33 (0.12; 0.54)**      |                              | 0.33 (0.12; 0.54)**      |                                        |

Adjusted for age; \* P<0.05; \*\* P< 0.01; \*\*\*P< 0.001; SBP; systolic blood pressure, MVPA; moderate to vigorous physical activity, BMI; body mass index, SES; social economic status, <sup>a</sup> Assessed using the absolute values for both indirect and direct effects

1  
2  
3  
4  
5  
6  
7  
8  
9  
10  
11  
12  
13  
14  
15  
16  
17  
18  
19  
20  
21  
22  
23  
24  
25  
26  
27  
28  
29  
30  
31  
32  
33  
34  
35  
36  
37  
38  
39  
40  
41  
42  
43  
44  
45  
46  
47

**Rural Fit Indices:** LR test of model vs. saturated:  $\chi^2(4) = 10.51$ , Prob >  $\chi^2 = 0.03$ ; RMSEA = 0.066; **CFI= 0.72** Comparative fit index;  
TLI= 0.37 Tucker-Lewis index; **SRMR= 0.04**: Standardized root mean squared residual, CD= 0.03 Coefficient of determination.

For peer review only



**Table 3c:** Structural equation model for SES, MVPA and BMI on SBP in the pooled sample of urban and rural women

| Effect of:<br>N=867         | Outcome: | Direct effects(95% CI)            | Indirect effects( 95%<br>CI) | Total effects(95% CI)             | Proportion of total effect<br>mediated |
|-----------------------------|----------|-----------------------------------|------------------------------|-----------------------------------|----------------------------------------|
| <b>Household<br/>assets</b> | SBP      | 0.23 (-0.08; 0.54)                |                              | 0.46 (0.15; 0.76)**               | 0.5                                    |
|                             | via BMI  |                                   | 0.23 (0.10; 0.35)***         |                                   |                                        |
|                             | BMI      | 0.20 (0.05; 0.34)**               |                              | 0.15 (0.01; 0.29)*                | 0.25 <sup>a</sup>                      |
|                             | via MVPA |                                   | -0.05 (-.100; 0.003)         |                                   |                                        |
|                             | MVPA     | -144.83 (-170.55; -<br>119.12)*** |                              | -144.83 (-170.55; -<br>119.12)*** |                                        |
| <b>MVPA</b>                 | SBP      | -0.001 (-0.002; -0.0005)**        |                              | -0.001 (-0.002; -0.0003)**        | 0.1 <sup>a</sup>                       |
|                             | via BMI  |                                   | 0.0001 (-0.0000;<br>0.0002)  |                                   |                                        |
| <b>BMI</b>                  | SBP      | 0.35 (0.21; 0.49)***              |                              | 0.35 (0.21; 0.49)***              |                                        |

Adjusted for age; \* P<0.05; \*\* P< 0.01; \*\*\*P< 0.001; SBP; systolic blood pressure, MVPA; moderate to vigorous intensity physical activity, BMI; body mass index, SES; social economic status, <sup>a</sup> Assessed using the absolute values for both indirect and direct effects

1  
2  
3  
4  
5 **Pooled Fit Indices:** LR test of model vs. saturated:  $\chi^2(4) = 24.829$ , Prob >  $\chi^2 = 0.000$ ; RMSEA = 0.077; **CFI= 0.89**

6  
7 Comparative fit index; TLI= 0.75 Tucker-Lewis index; **SRMR=0.033**: Standardized root mean squared residual, CD=0.137 Coefficient  
8  
9 of determination.  
10  
11  
12  
13  
14  
15  
16  
17  
18  
19  
20  
21  
22  
23  
24  
25  
26  
27  
28

### 29 **Figure legends**

30  
31 Figure 1: Selection of study participants in rural and urban

32  
33 Figure 2: Structural equation model for SES, MVPA and BMI on SBP in urban

34  
35 Figure 3: Structural equation model for SES, MVPA and BMI on SBP in rural

36  
37 Figure 4: Structural equation model for SES, MVPA and BMI on SBP pooled  
38  
39  
40  
41  
42  
43  
44  
45  
46  
47

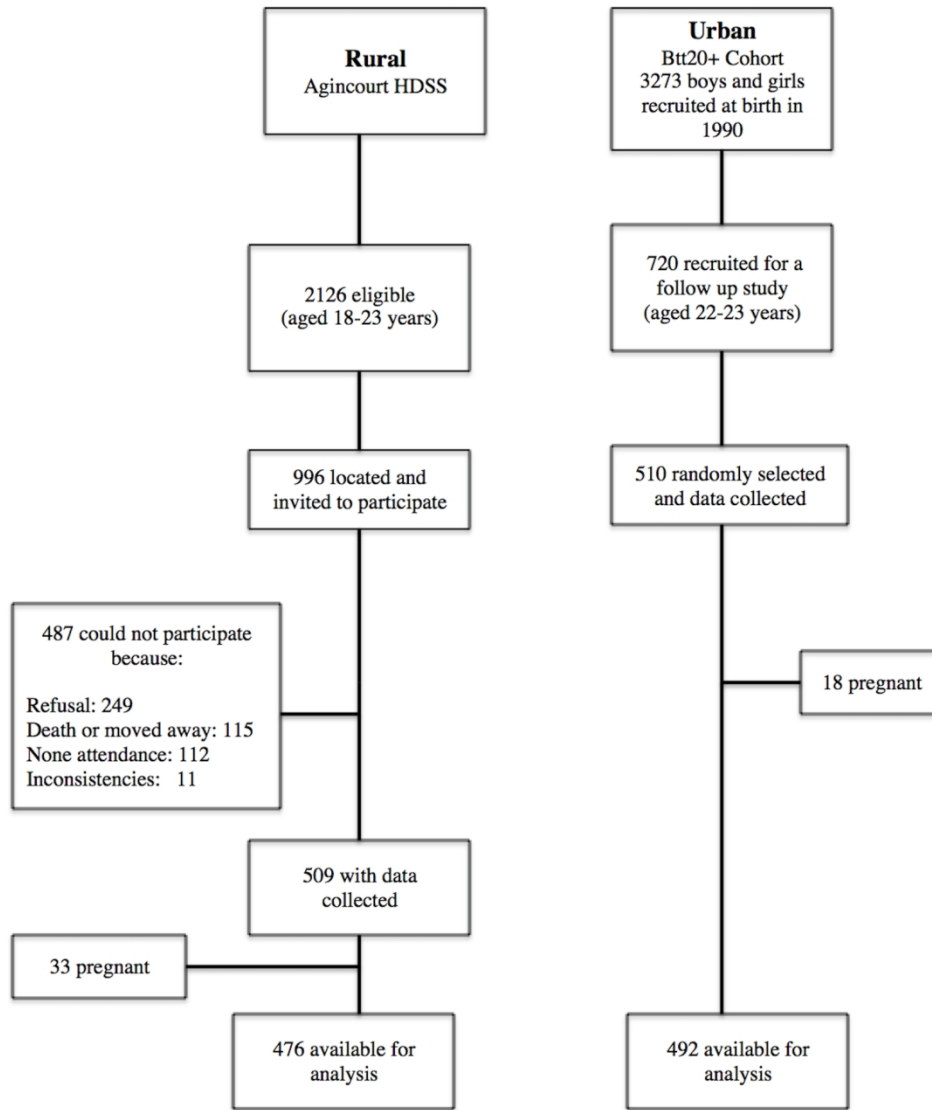

Figure 1: Selection of study participants in rural and urban

144x167mm (300 x 300 DPI)

1  
2  
3  
4  
5  
6  
7  
8  
9  
10  
11  
12  
13  
14  
15  
16  
17  
18  
19  
20  
21  
22  
23  
24  
25  
26  
27  
28  
29  
30  
31  
32  
33  
34  
35  
36  
37  
38  
39  
40  
41  
42  
43  
44  
45  
46  
47  
48  
49  
50  
51  
52  
53  
54  
55  
56  
57  
58  
59  
60

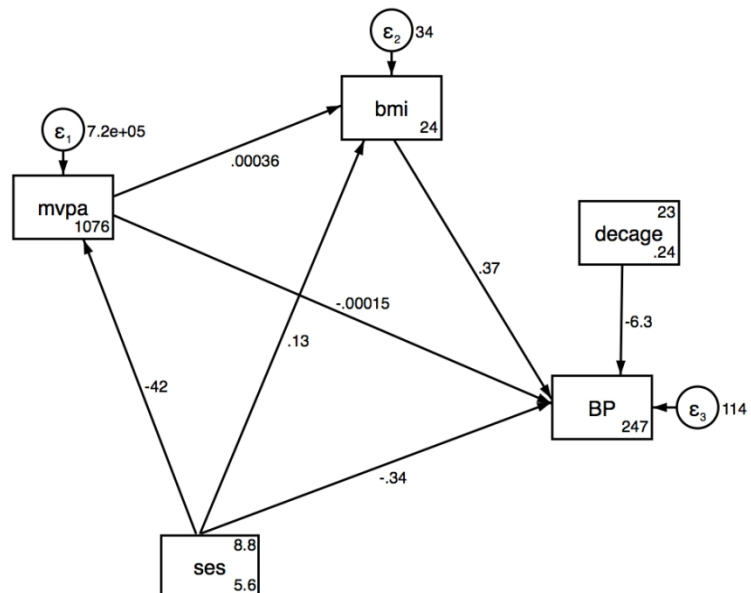

Figure 2: Structural equation model for SES, MVPA and BMI on SBP in urban  
106x70mm (300 x 300 DPI)



Figure 3: Structural equation model for SES, MVPA and BMI on SBP in rural  
106x70mm (300 x 300 DPI)

1  
2  
3  
4  
5  
6  
7  
8  
9  
10  
11  
12  
13  
14  
15  
16  
17  
18  
19  
20  
21  
22  
23  
24  
25  
26  
27  
28  
29  
30  
31  
32  
33  
34  
35  
36  
37  
38  
39  
40  
41  
42  
43  
44  
45  
46  
47  
48  
49  
50  
51  
52  
53  
54  
55  
56  
57  
58  
59  
60



Figure 4: Structural equation model for SES, MVPA and BMI on SBP pooled  
106x70mm (300 x 300 DPI)

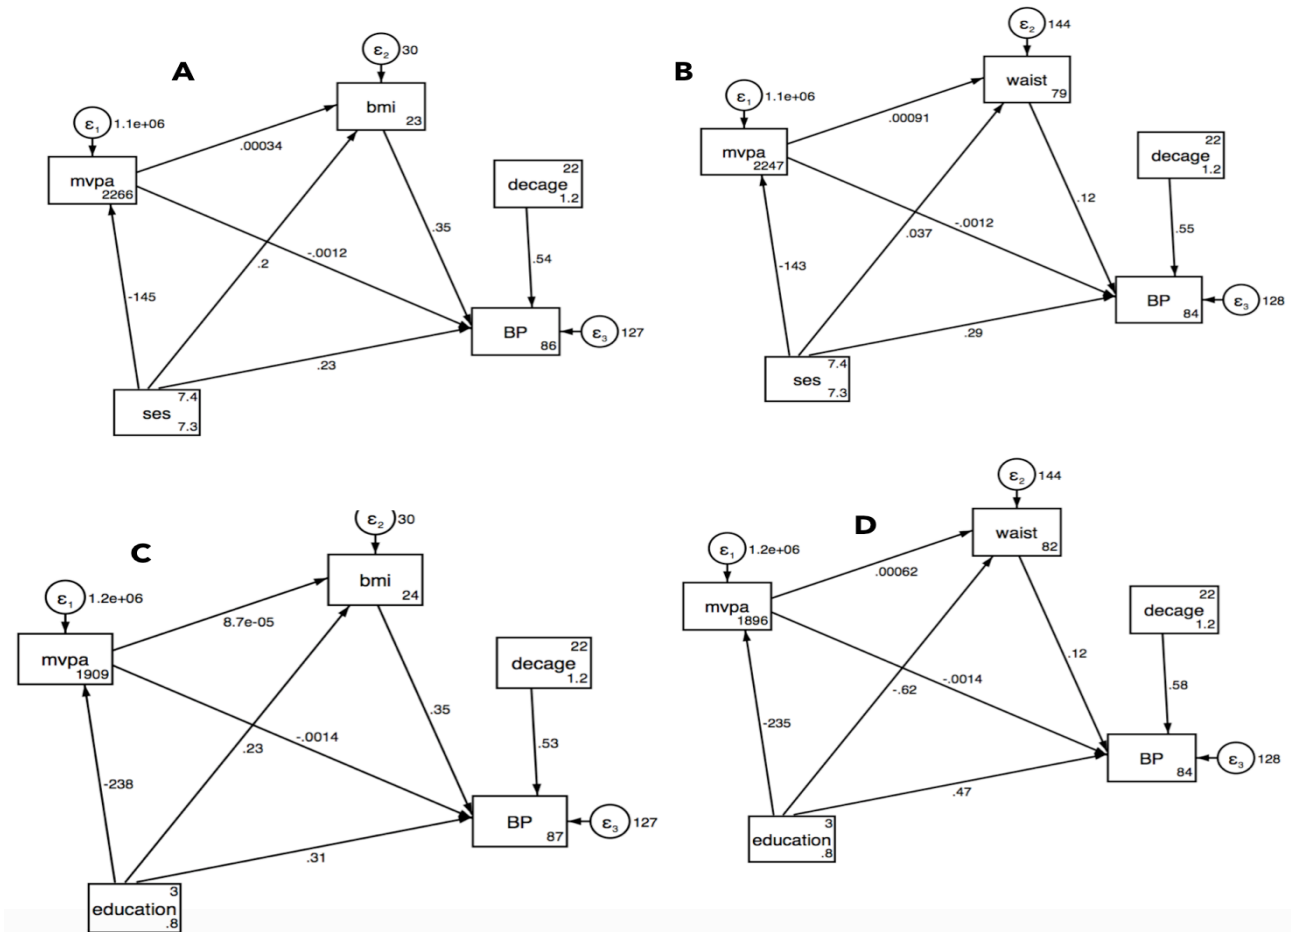

Figure SI; A: Structural equation model for **SES**, MVPA and **BMI** on SBP pooled; B: Structural equation model for **SES**, MVPA and **WC** on SBP pooled; C: Structural equation model for **education**, MVPA and **BMI** on SBP pooled; D: Structural equation model for **education**, MVPA and **WC** on SBP pooled.

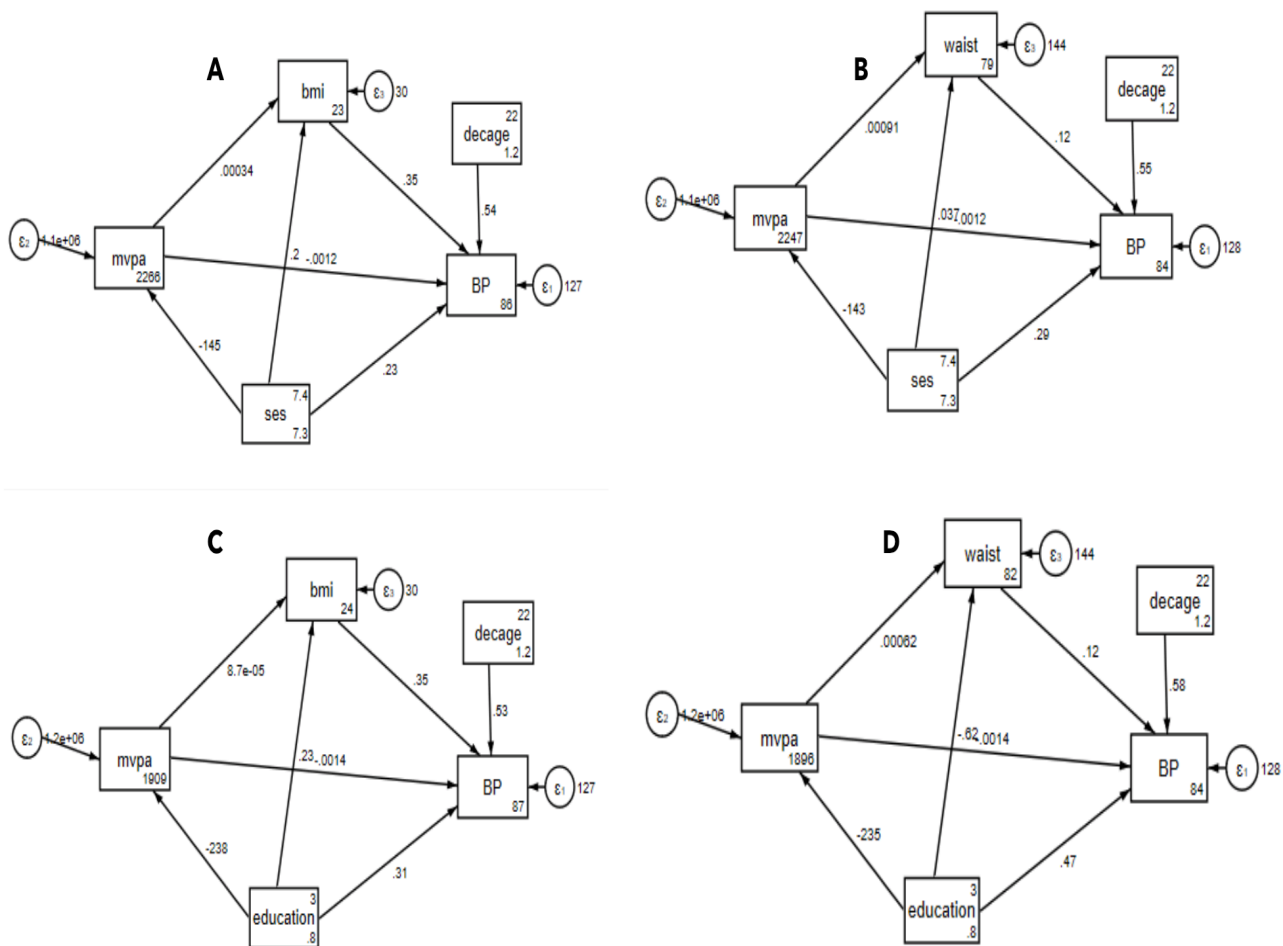

Figure S2 - SEMs based on Satorra–Bentler; A: Structural equation model for **SES**, **MVPA** and **BMI** on **SBP** pooled; B: Structural equation model for **SES**, **MVPA** and **WC** on **SBP** pooled; C: Structural equation model for **education**, **MVPA** and **BMI** on **SBP** pooled; D: Structural equation model for **education**, **MVPA** and **WC** on **SBP** pooled.



## STROBE Statement—checklist of items that should be included in reports of observational studies

|                           | Item No | Recommendation                                                                                                                                                                                                                                                                                                                                                                                                                                                                                                                                                                                                                                                                                                                                                                           |
|---------------------------|---------|------------------------------------------------------------------------------------------------------------------------------------------------------------------------------------------------------------------------------------------------------------------------------------------------------------------------------------------------------------------------------------------------------------------------------------------------------------------------------------------------------------------------------------------------------------------------------------------------------------------------------------------------------------------------------------------------------------------------------------------------------------------------------------------|
| <b>Title and abstract</b> | 1       | (a) Indicate the study's design with a commonly used term in the title or the abstract<br><b>MS Page 4 Par 2</b><br>(b) Provide in the abstract an informative and balanced summary of what was done and what was found <b>MS Page 4</b>                                                                                                                                                                                                                                                                                                                                                                                                                                                                                                                                                 |
| <b>Introduction</b>       |         |                                                                                                                                                                                                                                                                                                                                                                                                                                                                                                                                                                                                                                                                                                                                                                                          |
| Background/rationale      | 2       | Explain the scientific background and rationale for the investigation being reported<br><b>MS Pages 5-6</b>                                                                                                                                                                                                                                                                                                                                                                                                                                                                                                                                                                                                                                                                              |
| Objectives                | 3       | State specific objectives, including any prespecified hypotheses<br><b>MS Page 6 Par 2</b>                                                                                                                                                                                                                                                                                                                                                                                                                                                                                                                                                                                                                                                                                               |
| <b>Methods</b>            |         |                                                                                                                                                                                                                                                                                                                                                                                                                                                                                                                                                                                                                                                                                                                                                                                          |
| Study design              | 4       | Present key elements of study design early in the paper<br><b>Methods: MS Page 6 Par 3</b>                                                                                                                                                                                                                                                                                                                                                                                                                                                                                                                                                                                                                                                                                               |
| Setting                   | 5       | Describe the setting, locations, and relevant dates, including periods of recruitment, exposure, follow-up, and data collection<br><b>Methods: MS Page 6 Par 3</b>                                                                                                                                                                                                                                                                                                                                                                                                                                                                                                                                                                                                                       |
| Participants              | 6       | (a) <i>Cohort study</i> —Give the eligibility criteria, and the sources and methods of selection of participants. Describe methods of follow-up <b>N/A</b><br><br><i>Case-control study</i> —Give the eligibility criteria, and the sources and methods of case ascertainment and control selection. Give the rationale for the choice of cases and controls <b>N/A</b><br><br><i>Cross-sectional study</i> —Give the eligibility criteria, and the sources and methods of selection of participants <b>Methods: MS Page 6 Par 3</b><br>(b) <i>Cohort study</i> —For matched studies, give matching criteria and number of exposed and unexposed <b>N/A</b><br><br><i>Case-control study</i> —For matched studies, give matching criteria and the number of controls per case <b>N/A</b> |
| Variables                 | 7       | Clearly define all outcomes, exposures, predictors, potential confounders, and effect modifiers. Give diagnostic criteria, if applicable <b>Methods: MS Page 6 Par 4 – Page 8 Par 1</b>                                                                                                                                                                                                                                                                                                                                                                                                                                                                                                                                                                                                  |
| Data sources/measurement  | 8*      | For each variable of interest, give sources of data and details of methods of assessment (measurement). Describe comparability of assessment methods if there is more than one group <b>Methods: MS Page 6 Par 4 – Page 8 Par 1</b>                                                                                                                                                                                                                                                                                                                                                                                                                                                                                                                                                      |
| Bias                      | 9       | Describe any efforts to address potential sources of bias <b>Methods: MS Page 6 Par 3</b>                                                                                                                                                                                                                                                                                                                                                                                                                                                                                                                                                                                                                                                                                                |
| Study size                | 10      | Explain how the study size was arrived at <b>Methods: MS Page 6 Par 3</b>                                                                                                                                                                                                                                                                                                                                                                                                                                                                                                                                                                                                                                                                                                                |
| Quantitative variables    | 11      | Explain how quantitative variables were handled in the analyses. If applicable, describe which groupings were chosen and why <b>Methods: MS Page 8 Par 2</b>                                                                                                                                                                                                                                                                                                                                                                                                                                                                                                                                                                                                                             |
| Statistical methods       | 12      | (a) Describe all statistical methods, including those used to control for confounding<br><b>Statistical analyses: MS Page 8 Par 2 and 3</b><br>(b) Describe any methods used to examine subgroups and interactions <b>N/A</b><br>(c) Explain how missing data were addressed <b>Statistical analyses: MS Page 8 Par 2</b><br>(d) <i>Cohort study</i> —If applicable, explain how loss to follow-up was addressed<br><i>Case-control study</i> —If applicable, explain how matching of cases and controls was                                                                                                                                                                                                                                                                             |

1  
2  
3  
4  
5  
6  
7  
8  
9  
10  
11  
12  
13  
14  
15  
16  
17  
18  
19  
20  
21  
22  
23  
24  
25  
26  
27  
28  
29  
30  
31  
32  
33  
34  
35  
36  
37  
38  
39  
40  
41  
42  
43  
44  
45  
46  
47  
48  
49  
50  
51  
52  
53  
54  
55  
56  
57  
58  
59  
60

addressed **N/A**  
*Cross-sectional study*—If applicable, describe analytical methods taking account of  
sampling strategy **N/A**  

---

*(e)* Describe any sensitivity analyses **N/A**

Continued on next page

For peer review only

**Results**

|                  |     |                                                                                                                                                                                                                                                                                                                                                                                                                                                                  |
|------------------|-----|------------------------------------------------------------------------------------------------------------------------------------------------------------------------------------------------------------------------------------------------------------------------------------------------------------------------------------------------------------------------------------------------------------------------------------------------------------------|
| Participants     | 13* | (a) Report numbers of individuals at each stage of study—eg numbers potentially eligible, examined for eligibility, confirmed eligible, included in the study, completing follow-up, and analysed <b>Results: Page 8 Par 5 – Page 9 Par 1</b><br>(b) Give reasons for non-participation at each stage <b>N/A</b><br>(c) Consider use of a flow diagram <b>N/A</b>                                                                                                |
| Descriptive data | 14* | (a) Give characteristics of study participants (eg demographic, clinical, social) and information on exposures and potential confounders <b>Page 8 Par 5 – Page 9 Par 1</b><br>(b) Indicate number of participants with missing data for each variable of interest <b>Results: Page 8 Par 5</b><br>(c) <i>Cohort study</i> —Summarise follow-up time (eg, average and total amount) <b>N/A</b>                                                                   |
| Outcome data     | 15* | <i>Cohort study</i> —Report numbers of outcome events or summary measures over time <b>N/A</b><br><i>Case-control study</i> —Report numbers in each exposure category, or summary measures of exposure <b>N/A</b><br><i>Cross-sectional study</i> —Report numbers of outcome events or summary measures <b>Results: Page 8 Par 5</b>                                                                                                                             |
| Main results     | 16  | (a) Give unadjusted estimates and, if applicable, confounder-adjusted estimates and their precision (eg, 95% confidence interval). Make clear which confounders were adjusted for and why they were included <b>Results: Page 9 Par 1</b><br>(b) Report category boundaries when continuous variables were categorized <b>N/A</b><br>(c) If relevant, consider translating estimates of relative risk into absolute risk for a meaningful time period <b>N/A</b> |
| Other analyses   | 17  | Report other analyses done—eg analyses of subgroups and interactions, and sensitivity analyses <b>N/A</b>                                                                                                                                                                                                                                                                                                                                                        |

**Discussion**

|                  |    |                                                                                                                                                                                                                |
|------------------|----|----------------------------------------------------------------------------------------------------------------------------------------------------------------------------------------------------------------|
| Key results      | 18 | Summarise key results with reference to study objectives <b>Discussion: Page 9 Par 2</b>                                                                                                                       |
| Limitations      | 19 | Discuss limitations of the study, taking into account sources of potential bias or imprecision. Discuss both direction and magnitude of any potential bias <b>Discussion: Page 11 Par 4</b>                    |
| Interpretation   | 20 | Give a cautious overall interpretation of results considering objectives, limitations, multiplicity of analyses, results from similar studies, and other relevant evidence <b>Page 9 Par 3 – Page 11 Par 3</b> |
| Generalisability | 21 | Discuss the generalisability (external validity) of the study results <b>Discussion: Page 9 Par 3 – Page 11</b>                                                                                                |

**Other information**

|         |    |                                                                                                                                                                                             |
|---------|----|---------------------------------------------------------------------------------------------------------------------------------------------------------------------------------------------|
| Funding | 22 | Give the source of funding and the role of the funders for the present study and, if applicable, for the original study on which the present article is based <b>Funding: Page 12 Par 1</b> |
|---------|----|---------------------------------------------------------------------------------------------------------------------------------------------------------------------------------------------|

\*Give information separately for cases and controls in case-control studies and, if applicable, for exposed and unexposed groups in cohort and cross-sectional studies.

**Note:** An Explanation and Elaboration article discusses each checklist item and gives methodological background and published examples of transparent reporting. The STROBE checklist is best used in conjunction with this article (freely available on the Web sites of PLoS Medicine at <http://www.plosmedicine.org/>, Annals of Internal Medicine at <http://www.annals.org/>, and Epidemiology at <http://www.epidem.com/>). Information on the STROBE Initiative is available at [www.strobe-statement.org](http://www.strobe-statement.org).
